# Supplementary material for: A prospective trial comparing programmable targeted long-read sequencing and short-read genome sequencing for genetic diagnosis of cerebellar ataxia
Source: HighWire-hosted journal article supplement (doi:10.1101/gr.279634.124), 2025-02-27
Supplement: Supplemental_Fig_S1.pdf [file Supplemental_Fig_S1.pdf]

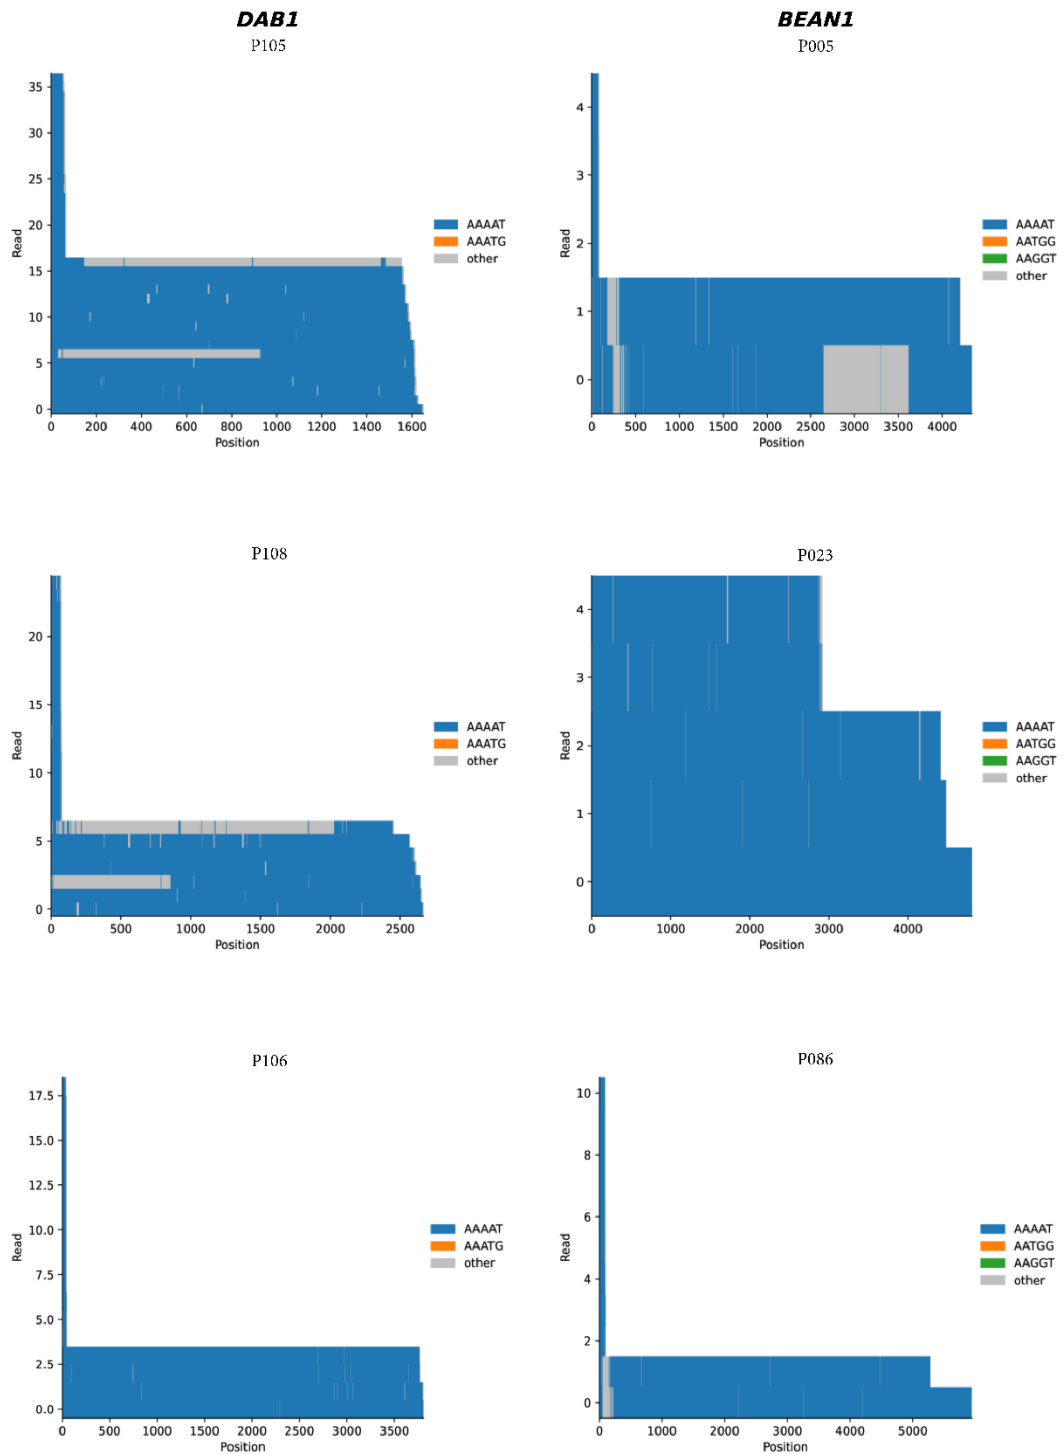

**Supplemental Fig. S1. IGV screenshots of repeat expansions in *BEAN1* and *DAB1*.**

Waterfall plots of LR-AS reads aligned to the *DAB1* and *BEAN1* loci in the three samples with largest Straglr allele sizes. The nonpathogenic reference motif is shown in blue on all plots; the pathogenic motif at each locus is depicted in orange if present.
