# Supplementary material for: A prospective trial comparing programmable targeted long-read sequencing and short-read genome sequencing for genetic diagnosis of cerebellar ataxia
Source: HighWire-hosted journal article supplement (doi:10.1101/gr.279634.124), 2025-02-27
Supplement: Supplemental_Fig_S5.pdf [file Supplemental_Fig_S5.pdf]

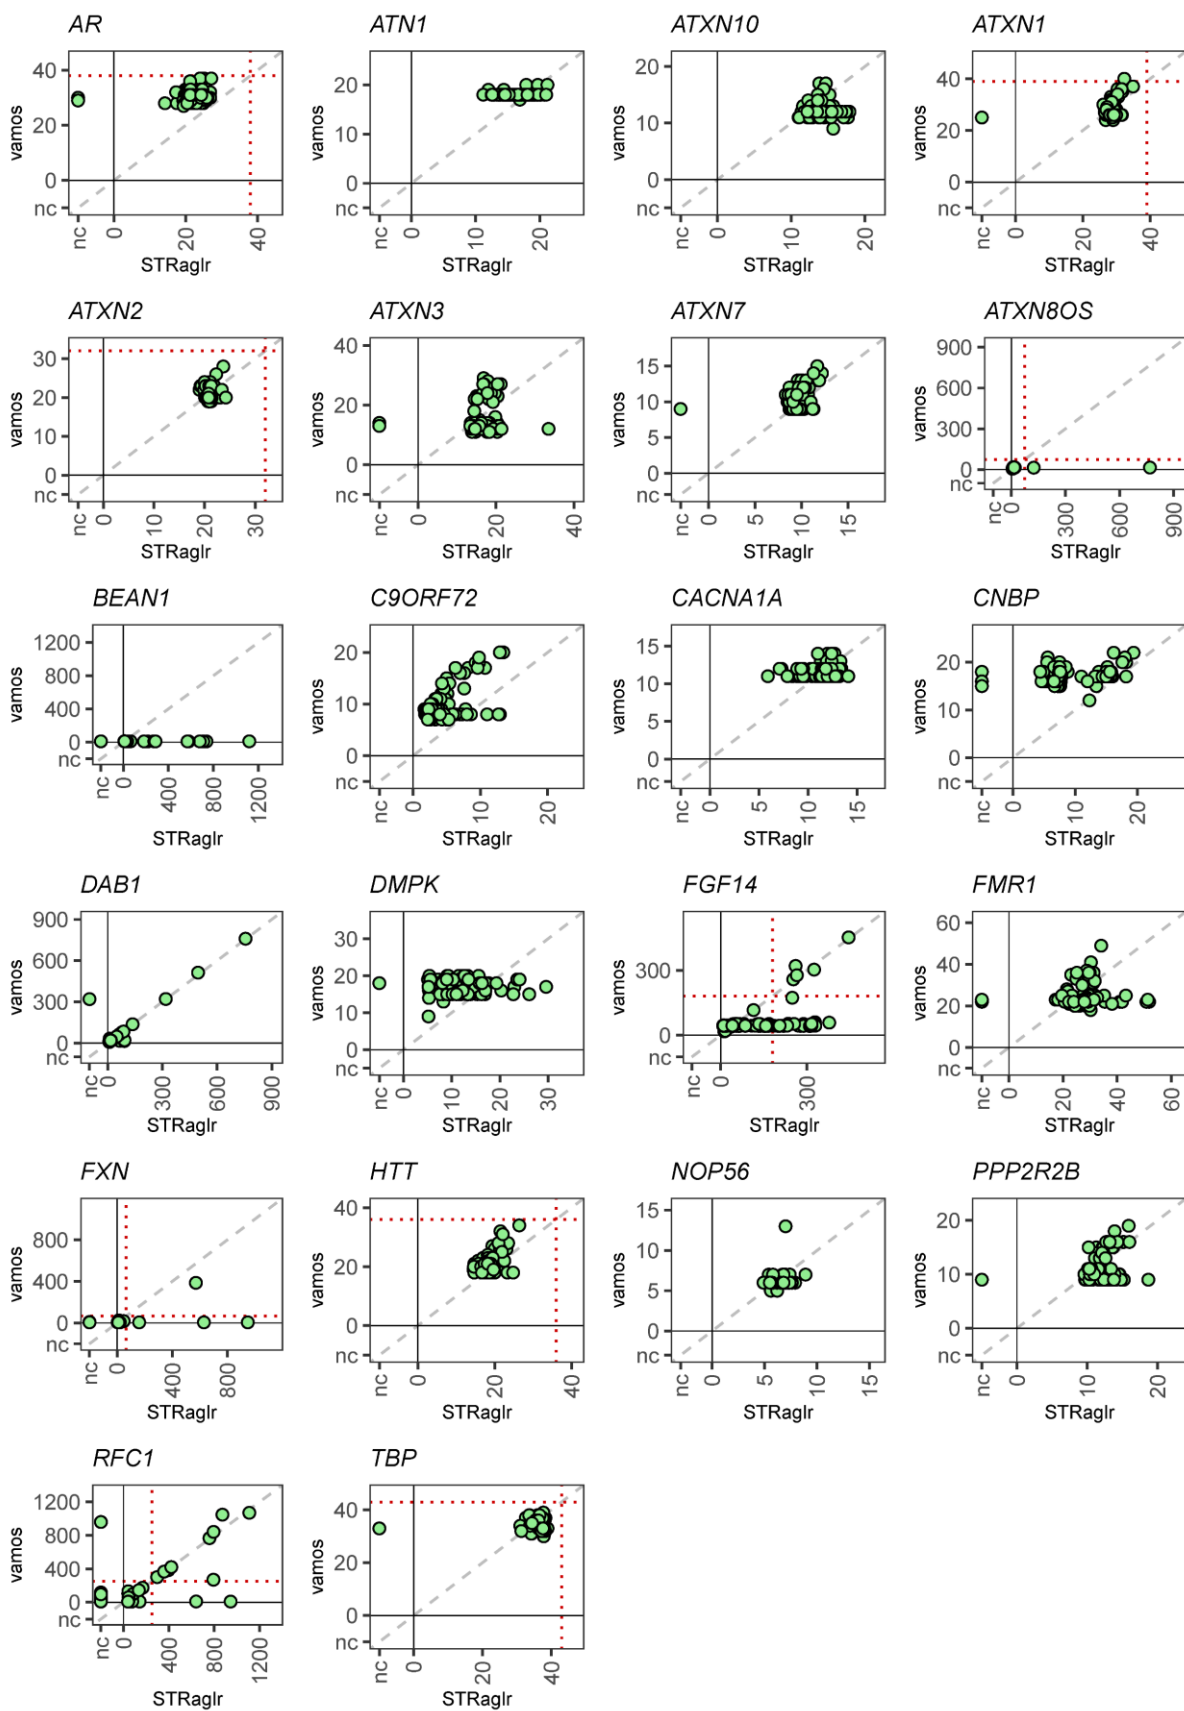

**Supplemental Fig. S5. Concordance plots LR-AS repeat expansions called with Straglr and vamos**

Concordance plot showing a comparison of predicted sizes of the larger allele by Straglr and vamos for all RE loci. The locus specific pathogenic thresholds are shown as dashed red lines. A 1:1 correlation is shown as a dashed grey line. Individuals with no call are indicated separately to the numbered axis and are labelled nc (i.e. no genotype call).
