# Supplementary material for: A prospective trial comparing programmable targeted long-read sequencing and short-read genome sequencing for genetic diagnosis of cerebellar ataxia
Source: HighWire-hosted journal article supplement (doi:10.1101/gr.279634.124), 2025-02-27
Supplement: Supplemental_Fig_S6.pdf [file Supplemental_Fig_S6.pdf]

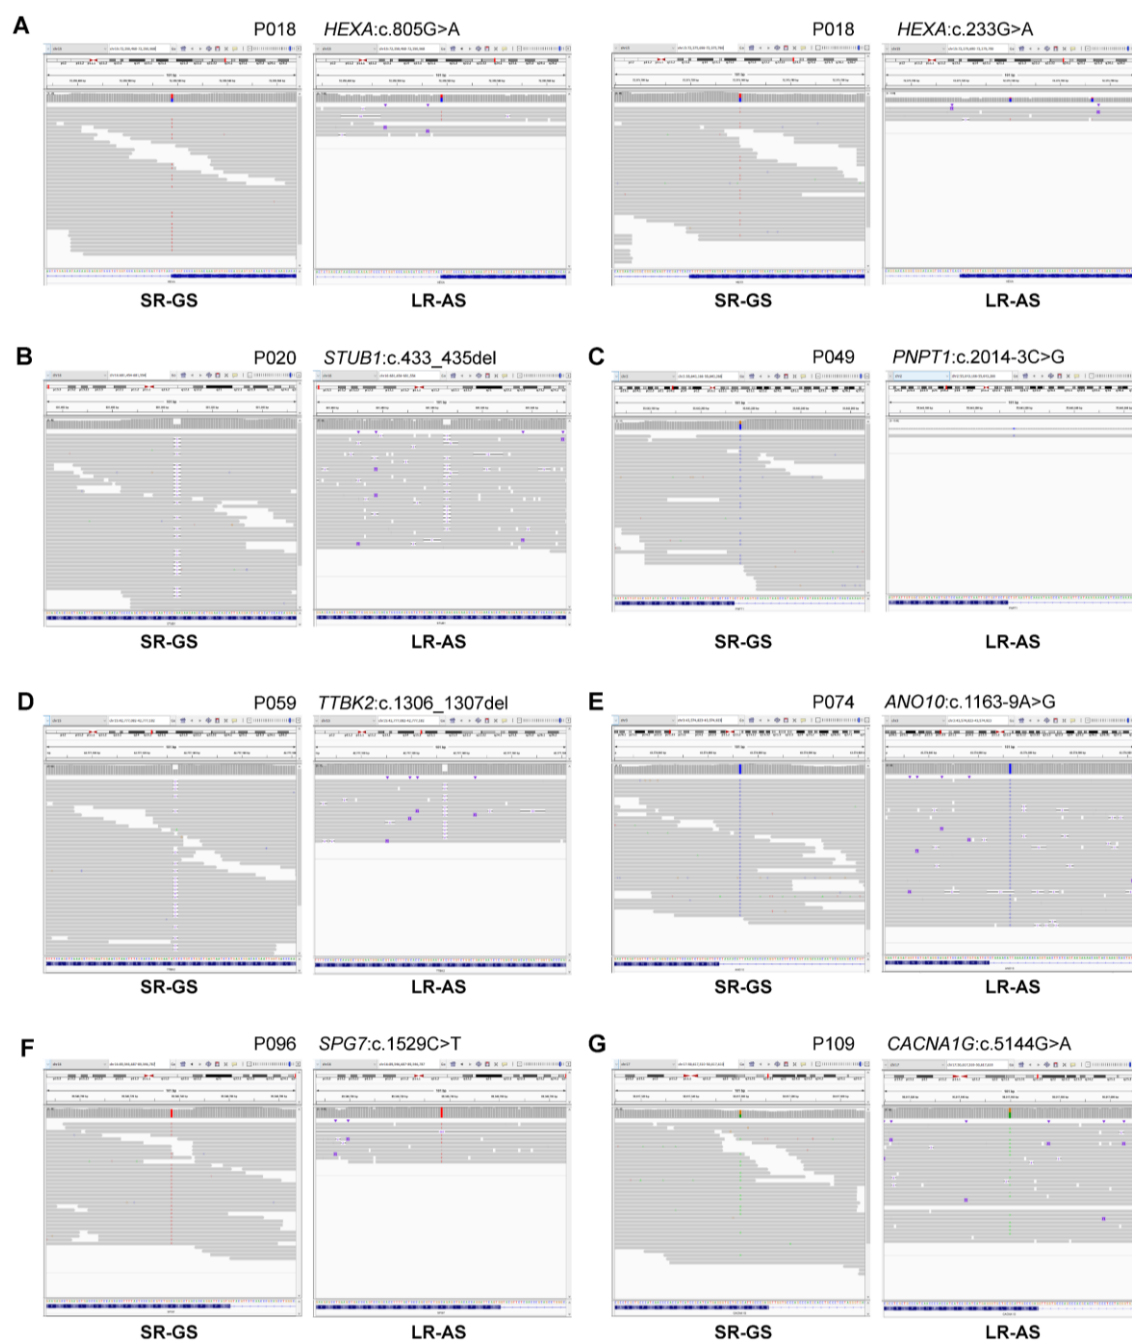

**Supplemental Fig. S6. IGV screenshots of short-read genome sequencing (SR-GS) and long-read adaptive sequencing (LR-AS) for single nucleotide and small insertion or deletion variant findings.** Full variant details in Table 3. The images confirm that all non-RE pathogenic variants identified in SR-GS data are also present in aligned LR-AS data.
