# Supplementary material for: A prospective trial comparing programmable targeted long-read sequencing and short-read genome sequencing for genetic diagnosis of cerebellar ataxia
Source: HighWire-hosted journal article supplement (doi:10.1101/gr.279634.124), 2025-02-27
Supplement: Supplemental_Methods.docx [file Supplemental_Methods.docx]

**Supplemental Methods:**

**Genomic DNA isolation**

Blood-derived genomic DNA was isolated by VCGS using the Qiasymphony DSP DNA Midi Kit (96) (Qiagen) or Mag-Bind Blood and Tissue DNA HDQ 96 Kit (Omega Bio-Tek) and Fluent liquid handler platform (Tecan) or isolated in the research laboratory using the NucleoBond CB Kit (Machery-Nagel). DNA integrity was assessed by TapeStation (Agilent Technologies) analysis. Electropherograms generally displayed a single peak maxima >60,000bp and a DIN between 7.5 and 10. Only samples with a DIN>7 were utilized for library preparation.

**Targeted long-read sequencing**

Genomic DNA was sheared by passage through a 26G needle ~10 times to achieve a fragment size distribution of 5-20kb. Nanopore sequencing libraries were prepared from ~3 μg of sheared gDNA, using SQK-LSK110 Ligation Sequencing Kit (Oxford Nanopore Technologies) and the NEBNext Companion Module (New England BioLabs) according to the manufacturer’s specifications.
