# Supplementary material for: A prospective trial comparing programmable targeted long-read sequencing and short-read genome sequencing for genetic diagnosis of cerebellar ataxia
Source: HighWire-hosted journal article supplement (doi:10.1101/gr.279634.124), 2025-02-27
Supplement: Supplemental_Table_S1.docx [file Supplemental_Table_S1.docx]

**Supplemental Table S1.** Repeat expansion carrier findings for *RFC1* and *FXN*

| **Individual ID** | **Gene** | **Disease** | **Inheritance** | **EH5 identified as expanded~** | **Straglr called motif** | **Straglr RE size** | **Zygosity** |
| --- | --- | --- | --- | --- | --- | --- | --- |
| P026 | *FXN* | FRDA | AR | + | (GAA)n | 14* | Het |
| P073 | *FXN* | FRDA | AR | + | (GAA)n | 570* | Het |
| P085 | *FXN* | FRDA | AR | + | (GAA)n | 629 | Het |
| P109 | *FXN* | FRDA | AR | + | (GAA)n | 160 | Het |
| P005 | *RFC1* | CANVAS | AR | + | (AAGGG)n | 395* | Het |
| P109 | *RFC1* | CANVAS | AR | + | (AAGGG)n | 1109* | Het |
| P014 | *RFC1* | CANVAS | AR | + | (AAAGG)n^ | 758* | Het |
| P047 | *RFC1* | CANVAS | AR | + | (AAGGG)n | 167* | Het |
| P090 | *RFC1* | CANVAS | AR | + | (AAAGG)n^ | 640* | Het |
| P106 | *RFC1* | CANVAS | AR | + | (AATGG)n^ | 793* | Het |

AR, autosomal recessive; EH5, ExpansionHunter5; +, identified; RE, repeat expansion; Het, heterozygous.

* less than 7 supporting reads.

^ motif incorrectly called by Straglr. Upon manual review and orthogonal testing, motif is AAGGG.

~ without k-mer filtering.
