# Supplementary material for: A prospective trial comparing programmable targeted long-read sequencing and short-read genome sequencing for genetic diagnosis of cerebellar ataxia
Source: HighWire-hosted journal article supplement (doi:10.1101/gr.279634.124), 2025-02-27
Supplement: Supplemental_Table_S2.docx [file Supplemental_Table_S2.docx]

**Supplemental Table S2.** Comparison of *FGF14* STR allele calls by SR-GS, PCR and LR-AS

| **Individual ID** |  | **Shorter allele RE size** | | | |  | **Longer allele RE size** | | | |  | **Comment** |
| --- | --- | --- | --- | --- | --- | --- | --- | --- | --- | --- | --- | --- |
|  | **EH5** | **PCR** | **Straglr** | **Straglr supporting reads** | **EH5** | **PCR** | **Straglr** | **Straglr supporting reads** |  |
| P001 |  | 9 | 9 | 9 | 3 | 87 | 169 | 168 | 8 |  |  |
| P002 |  | 18 | 17 | 24 | 11 |  | 120 | 240 | 237 | 3 |  | EH5 false positive |
| P003 |  | 134 | 182 | 155 | 10 |  | 134 | 286 | 289 | 10 |  |  |
| P004 |  | 10 | 10 | 9 | 6 |  | 105 | 346 | 327 | 6 |  |  |
| P005 |  | 101 | 54 | 72 | 3 |  | 101 | 308 | 328 | 2 |  |  |
| P006 |  | 10 | 9 | 10 | 6 |  | 43 | 35 | 36 | 3 |  |  |
| P007 |  | 9 | 9 | n/a | n/a |  | 25 | 24 | 20 | 8 |  |  |
| P008 |  | 12 | 11 | n/a | n/a |  | 53 | 58 | 59 | 6 |  |  |
| P009 |  | 12 | 11 | n/a | n/a |  | 79 | 87 | 13 | 7 |  | Discordant in LR-AS |
| P010 |  | 10 | 9 | 10 | 20 |  | 61 | 60 | 64 | 20 |  |  |
| P011 |  | 10 | 10 | n/a | n/a |  | 18 | 17 | 13 | 8 |  |  |
| P012 |  | 10 | 10 | n/a | n/a |  | 10 | 10 | 10 | 7 |  |  |
| P013 |  | 126 | 167 | 176 | 14 |  | 126 | 447 | 446 | 6 |  |  |
| P014 |  | 10 | 9 | 10 | 12 |  | 150 | 310 | 261 | 9 |  |  |
| P015 |  | 18 | 17 | 17 | 27 |  | 38 | 31 | 36 | 27 |  |  |
| P016 |  | 10 | 10 | n/a | n/a |  | 12 | 11 | 11 | 50 |  |  |
| P017 |  | 10 | 10 | n/a | n/a |  | 18 | 17 | 13 | 16 |  |  |
| P018 |  | 40 | 36 | n/a | n/a |  | 40 | 39 | 38 | 7 |  |  |
| P019 |  | 10 | 10 | 10 | 25 |  | 63 | 83 | 86 | 16 |  |  |
| P020 |  | 9 | 9 | 9 | 23 |  | 41 | 39 | 41 | 15 |  |  |
| P021 |  | 9 | 9 | 8 | 5 |  | 164 | 229 | 235 | 7 |  | EH5 false positive |
| P022 |  | 114 | 71 | n/a | n/a |  | 114 | 400 | 108 | 5 |  | Discordant in LR-AS |
| P023 |  | 18 | 17 | 16 | 6 |  | 39 | 36 | 38 | 9 |  |  |
| P024 |  | 77 | 43 | 47 | 22 |  | 77 | 161 | 162 | 12 |  |  |
| P025 |  | 10 | 9 | 33 | 11 |  | 118 | 315 | 312 | 15 |  |  |
| P026 |  | 17 | 16 | n/a | n/a |  | 138 | 293 | 16 | 2 |  | Discordant in LR-AS |
| P027 |  | 39 | 45 | n/a | n/a |  | 52 | 58 | 55 | 19 |  |  |
| P028 |  | 17 | 16 | 16 | 4 |  | 82 | 138 | 131 | 4 |  |  |
| P029 |  | 10 | 10 | n/a | n/a |  | 40 | 33 | n/a | n/a |  | Discordant in LR-AS |
| P030 |  | 88 | 76 | 79 | 5 |  | 88 | 198 | 185 | 2 |  |  |
| P031 |  | 9 | 9 | 9 | 3 |  | 36 | 38 | 40 | 5 |  |  |
| P032 |  | 79 | 44 | 46 | 4 |  | 79 | 129 | 132 | 6 |  |  |
| P033 |  | 10 | 9 | n/a | n/a |  | 12 | 11 | 10 | 8 |  |  |
| P034 |  | 10 | 10 | n/a | n/a |  | 12 | 11 | 10 | 5 |  |  |
| P035 |  | 9 | 9 | 9 | 15 |  | 55 | 158 | 157 | 16 |  |  |
| P036 |  | 41 | 35 | n/a | n/a |  | 49 | 48 | 42 | 14 |  |  |
| P037 |  | 10 | 10 | n/a | n/a |  | 17 | 16 | 13 | 7 |  |  |
| P038 |  | 95 | 55 | 57 | 2 |  | 95 | 313 | 325 | 4 |  |  |
| P039 |  | 10 | 9 | n/a | n/a |  | 12 | 11 | 11 | 40 |  |  |
| P040 |  | 17 | 16 | 16 | 3 |  | 188 | 400 | 127 | 2 |  | Discordant in LR-AS |
| P041 |  | 12 | 11 | n/a | n/a |  | 12 | 11 | 11 | 24 |  |  |
| P042 |  | 12 | 11 | 38 | 5 |  | 126 | 253 | 253 | 7 |  |  |
| P043 |  | 10 | 9 | n/a | n/a |  | 11 | 10 | 10 | 26 |  |  |
| P044 |  | 10 | 9 | 10 | 24 |  | 88 | 81 | 81 | 22 |  |  |
| P045 |  | 12 | 11 | 15 | 15 |  | 145 | 349 | 330 | 16 |  |  |
| P046 |  | 17 | 16 | 17 | 29 |  | 112 | 133 | 137 | 15 |  | EH5 false positive |
| P047 |  | 9 | 8 | n/a | n/a |  | 9 | 8 | 8 | 9 |  |  |
| P048 |  | 17 | 16 | n/a | n/a |  | 18 | 17 | 17 | 23 |  |  |
| P049 |  | 29 | 34 | n/a | n/a |  | 54 | 49 | 43 | 9 |  |  |
| P050 |  | 10 | 9 | 9 | 8 |  | 130 | 265 | 271 | 4 |  |  |
| P051 |  | 18 | 17 | n/a | n/a |  | 23 | 20 | 19 | 35 |  |  |
| P052 |  | 18 | 17 | 17 | 5 |  | 117 | 281 | 277 | 3 |  |  |
| P053 |  | 17 | 16 | 16 | 14 |  | 102 | 215 | 205 | 9 |  | EH5 false positive |
| P054 |  | 10 | 9 | 10 | 5 |  | 67 | 63 | 65 | 9 |  |  |
| P055 |  | 10 | 9 | n/a | n/a |  | 10 | 9 | 10 | 16 |  |  |
| P056 |  | 10 | 9 | 9 | 9 |  | 113 | 228 | 219 | 6 |  | EH5 false positive |
| P057 |  | 17 | 16 | 18 | 8 |  | 125 | 207 | 210 | 3 |  | EH5 false positive |
| P058 |  | 17 | 16 | 16 | 5 |  | 45 | 39 | 41 | 12 |  |  |
| P059 |  | 10 | 9 | n/a | n/a |  | 95 | 118 | 10 | 7 |  | Discordant in LR-AS; EH5 false positive |
| P060 |  | 34 | 35 | n/a | n/a |  | 43 | 50 | 44 | 23 |  | Not a pure GAA motif |
| P061 |  | 9 | 8 | n/a | n/a |  | 9 | 8 | 9 | 19 |  |  |
| P062 |  | 18 | 17 | 17 | 23 |  | 39 | 37 | 40 | 14 |  |  |
| P063 |  | 10 | 9 | 7 | 2 |  | 119 | 327 | 325 | 3 |  |  |
| P064 |  | 10 | 9 | 9 | 11 |  | 182 | 287 | 256 | 5 |  |  |
| P065 |  | 34 | 29 | 30 | 17 |  | 62 | 54 | 55 | 20 |  |  |
| P066 |  | 18 | 17 | 18 | 17 |  | 51 | 50 | 53 | 16 |  |  |
| P067 |  | 25 | 24 | 25 | 13 |  | 186 | 267 | 265 | 12 |  |  |
| P068 |  | 20 | 19 | 19 | 14 |  | 133 | 268 | 249 | 6 |  |  |
| P069 |  | 10 | 9 | n/a | n/a |  | 12 | 11 | 10 | 15 |  |  |
| P070 |  | 10 | 9 | n/a | n/a |  | 10 | 10 | 10 | 40 |  |  |
| P071 |  | 40 | 38 | n/a | n/a |  | 40 | 41 | 41 | 13 |  |  |
| P072 |  | 10 | 9 | 22 | 23 |  | 146 | 289 | 288 | 11 |  |  |
| P073 |  | 17 | 16 | n/a | n/a |  | 18 | 17 | 16 | 12 |  |  |
| P074 |  | 17 | 16 | n/a | n/a |  | 36 | 30 | 21 | 33 |  |  |
| P075 |  | 11 | 10 | 10 | 14 |  | 111 | 202 | 200 | 7 |  | EH5 false positive |
| P076 |  | 12 | 11 | 12 | 11 |  | 49 | 43 | 45 | 17 |  |  |
| P077 |  | 10 | 9 | n/a | n/a |  | 12 | 11 | 11 | 40 |  |  |
| P078 |  | 62 | 41 | 44 | 15 |  | 62 | 305 | 317 | 8 |  | Not a pure GAA motif |
| P079 |  | 12 | 11 | 12 | 8 |  | 82 | 113 | 114 | 10 |  |  |
| P080 |  | 18 | 17 | 17 | 18 |  | 45 | 40 | 42 | 16 |  |  |
| P081 |  | 85 | 41 | 45 | 8 |  | 85 | 165 | 166 | 7 |  |  |
| P082 |  | 109 | 53 | 59 | 17 |  | 109 | 230 | 232 | 9 |  | EH5 false positive |
| P083 |  | 18 | 17 | 16 | 16 |  | 41 | 34 | 35 | 8 |  |  |
| P084 |  | 12 | 11 | n/a | n/a |  | 18 | 17 | 15 | 31 |  |  |
| P085 |  | 10 | 9 | 10 | 9 |  | 57 | 82 | 86 | 9 |  |  |
| P086 |  | 16 | 15 | n/a | n/a |  | 17 | 16 | 16 | 29 |  |  |
| P087 |  | 10 | 9 | n/a | n/a |  | 17 | 16 | 14 | 30 |  |  |
| P088 |  | 10 | 9 | n/a | n/a |  | 10 | 9 | 10 | 36 |  |  |
| P089 |  | 34 | 29 | 31 | 14 |  | 118 | 146 | 149 | 20 |  | EH5 false positive |
| P090 |  | 44 | 39 | 47 | 11 |  | 109 | 315 | 310 | 9 |  |  |
| P091 |  | 16 | 9 | n/a | n/a |  | 18 | 15 | 13 | 26 |  |  |
| P092 |  | 17 | 16 | 16 | 36 |  | 102 | 135 | 136 | 20 |  | EH5 false positive |
| P093 |  | 34 | 31 | n/a | n/a |  | 39 | 32 | 33 | 35 |  |  |
| P094 |  | 9 | 8 | n/a | n/a |  | 9 | 9 | 9 | 49 |  |  |
| P095 |  | 41 | 35 | n/a | n/a |  | 47 | 39 | 40 | 41 |  |  |
| P096 |  | 12 | 11 | 12 | 11 |  | 44 | 43 | 46 | 13 |  |  |
| P097 |  | 10 | 9 | n/a | n/a |  | 17 | 16 | 15 | 18 |  |  |
| P098 |  | 17 | 16 | 17 | 17 |  | 57 | 120 | 121 | 19 |  |  |
| P099 |  | 10 | 9 | 15 | 25 |  | 61 | 88 | 149 | 7 |  | Not a pure GAA motif |
| P100 |  | 90 | 54 | 77 | 27 |  | 90 | 374 | 378 | 9 |  |  |
| P101 |  | 43 | 35 | 48 | 29 |  | 151 | 317 | 316 | 20 |  |  |
| P102 |  | 36 | 19 | 19 | 20 |  | 44 | 36 | 38 | 21 |  |  |
| P103 |  | 12 | 11 | 11 | 13 |  | 134 | 159 | 154 | 12 |  | EH5 false positive |
| P104 |  | 11 | 10 | 11 | 15 |  | 68 | 54 | 56 | 25 |  |  |
| P105 |  | 10 | 9 | 16 | 14 |  | 100 | 208 | 205 | 15 |  | EH5 false positive |
| P106 |  | 18 | 17 | 27 | 14 |  | 148 | 310 | 316 | 8 |  |  |
| P107 |  | 101 | 52 | 62 | 19 |  | 101 | 322 | 325 | 19 |  |  |
| P108 |  | 75 | 41 | 44 | 17 |  | 75 | 134 | 134 | 14 |  |  |
| P109 |  | 10 | 9 | 10 | 7 |  | 53 | 44 | 45 | 16 |  |  |
| P110 |  | 10 | 9 | n/a | n/a |  | 12 | 11 | 10 | 39 |  |  |

RE, repeat expansion; EH5, ExpansionHunter5; LR-AS, long-read sequencing with adaptive sampling.
