# Supplementary material for: A prospective trial comparing programmable targeted long-read sequencing and short-read genome sequencing for genetic diagnosis of cerebellar ataxia
Source: HighWire-hosted journal article supplement (doi:10.1101/gr.279634.124), 2025-02-27
Supplement: Supplemental_Table_S3.docx [file Supplemental_Table_S3.docx]

**Supplemental Table S3.** Repeat expansion variants of uncertain significance identified

| **Individual ID** | **Sex** | **Age at testing** | **Age at onset** | **FHx of CA** | **Gene** | **Disease** | **Inheritance** | **Variant motif** | **EH5 RE size** | **Straglr RE size** | **PCR RE size** | **Zygosity** | **Clinical presentation** |
| --- | --- | --- | --- | --- | --- | --- | --- | --- | --- | --- | --- | --- | --- |
| P002 | M | 82 | 59 | - | *FGF14* | SCA27B | AD | (GAA)n | 120 | 237* | 240 | Het | CABV |
| P021 | F | 77 | 72 | - | *FGF14* | SCA27B | AD | (GAA)n | 164 | 235 | 229 | Het | CA |
| P030 | M | 63 | 59 | - | *FGF14* | SCA27B | AD | (GAA)n | 88 | 185* | 198 | Het | CA |
| P053 | F | 85 | 73 | - | *FGF14* | SCA27B | AD | (GAA)n | 102 | 205 | 215 | Het | CABV |
| P056 | M | 81 | 70 | - | *FGF14* | SCA27B | AD | (GAA)n | 113 | 219* | 228 | Het | CABV |
| P057 | F | 37 | 34 | - | *FGF14* | SCA27B | AD | (GAA)n | 125 | 210* | 207 | Het | CA |
| P075 | F | 75 | ND | - | *FGF14* | SCA27B | AD | (GAA)n | 111 | 200 | 202 | Het | CA |
| P082 | F | 83 | 78 | - | *FGF14* | SCA27B | AD | (GAA)n | 109 | 232 | 230 | Het | Episodic CA |
| P105 | M | 77 | 72 | - | *FGF14* | SCA27B | AD | (GAA)n | 100 | 205 | 208 | Het | CA and sensory neuropathy |

M, male; F, female; ND, no data available; FHx, family history; CA, cerebellar ataxia; -, absent; AD, autosomal dominant; EH5, ExpansionHunter5; RE, repeat expansion; Het, heterozygous; CABV, cerebellar ataxia and bilateral vestibulopathy.

* less than 7 supporting reads.
