# Supplementary material for: A prospective trial comparing programmable targeted long-read sequencing and short-read genome sequencing for genetic diagnosis of cerebellar ataxia
Source: HighWire-hosted journal article supplement (doi:10.1101/gr.279634.124), 2025-02-27
Supplement: Supplemental_Table_S4.docx [file Supplemental_Table_S4.docx]

**Supplemental Table S4**. Single nucleotide and small insertion or deletion variants of uncertain significance

| **Individual ID** | **Sex** | **Age at testing** | **Age at onset** | **FHx of CA** | **Gene** | **Disease** | **Inheritance** | **Genomic variant (hg38)** | **HGVSc** | **HGVSp** | **Zygosity** | **Consequence** | **Classification** | **Clinical presentation** |
| --- | --- | --- | --- | --- | --- | --- | --- | --- | --- | --- | --- | --- | --- | --- |
| P017 | M | 45 | 34 | + | *CACNA1A* | *CACNA1A*-related disorder | AD | Chr19:13259654C>T | c.4298G>A | p.(Arg1433Gln) | Het | missense | VUS | CA and ID (1q21.1 microduplication) |
| P098 | M | 59 | 49 | + | *CACNA1A* | *CACNA1A*-related disorder | AD | Chr19:13455156A>G | c.350T>C | p.(Leu117Pro) | Het | missense | VUS | CA |
| P047 | F | 63 | 60 | - | *CACNA1G* | SCA42 | AD | Chr17:50604166G>A | c.4181G>A | p.(Arg1394Gln) | Het | missense | VUS | CA |
| P058 | M | 50 | 46 | - | *FAT2 KCND3* | SCA45 SCA19/22 | AD AD | Chr5:151543268ACATCTGCGTTCTGACCTT>A Chr1:111776162TC>T | c.7841_7858del c.1882del | p.(Glu2614_Asp2619del) p.(Glu628Lysfs*18) | Het Het | inframe deletion frameshift | VUS VUS | CA |
| P089 | M | 72 | 69 | - | *KCND3* | SCA19/22 | AD | Chr1:111982684C>T | c.43G>A | p.(Ala15Thr) | Het | missense | VUS | CA and upper limb hyperreflexia |
| P011 | F | 82 | 61 | + | *NPTX1* | SCA50 | AD | Chr17:80475584G>C | c.579C>G | p.(Asn193Lys) | Het | missense | VUS | CA |
| P027 | M | 76 | 71 | + | *NPTX1* | SCA50 | AD | Chr17:80475584G>C | c.579C>G | p.(Asn193Lys) | Het | missense | VUS | CA |
| P051 | F | 69 | 55 | - | *PRKCG* | SCA14 | AD | Chr19:53891737T>C | c.593T>C | p.(Leu198Pro) | Het | missense | VUS | CA |
| P055 | F | 68 | ND | - | *STUB1* | SCA48 | AD | Chr16:681475GGAC>G | c.400_402del | p.(Asp134del) | Het | inframe deletion | VUS | CA and dementia |

M, male; F, female; ND, no data available; FHx, family history; CA, cerebellar ataxia; -, absent; +, present; AD, autosomal dominant; Het, heterozygous; VUS, variant of uncertain significance; ID, intellectual disability.

Transcripts: *CACNA1A*, NM_001127222.2; *CACNA1G*, NM_018896.5; *FAT2*, NM_001447.3; *KCND3*, NM_001378969.1; *NPTX1*, NM_002522.4; *PRKCG*, NM_002739.5; *STUB1*, NM_005861.4.
