# Supplementary material for: A prospective trial comparing programmable targeted long-read sequencing and short-read genome sequencing for genetic diagnosis of cerebellar ataxia
Source: HighWire-hosted journal article supplement (doi:10.1101/gr.279634.124), 2025-02-27
Supplement: Supplemental_Table_S5.xlsx [file Supplemental_Table_S5.xlsx]

## Sheet: ST5_Sequencing_Depth_By_Interva
Supplemental Table S5. LR-AS outcomes for targeted loci calculated by mosdepth
Adaptive sequencing interval	Gene(s) in interval	P001	P002	P003	P004	P005	P006	P007	P008	P009	P010	P011	P012	P013	P014	P015	P016	P017	P018	P019	P020	P021	P022	P023	P024	P025	P026	P027	P028	P029	P030	P031	P032	P033	P034	P035	P036	P037	P038	P039	P040	P041	P042	P043	P044	P045	P046	P047	P048
Chr1_109516104_109732051	AMPD2	11.88	19.83	0.45	13.13	7.47	1.89	0.95	2.5	10.99	27.92	7.77	2.48	16.17	20.78	45.7	41.73	1.78	1.02	35.94	31.16	9.58	4.6	11.32	30.02	24.24	5.4	10.65	4.98	0.63	11.73	11.26	9.04	16.01	5.54	24.02	15.91	9.21	10.09	34.01	0.54	18.35	12.93	11.53	28.54	30.24	30.5	12.32	16.86
Chr1_110419837_110731474	KCNA2	12.31	22.49	0.57	15.38	7.86	5.17	2.82	4.91	10.66	29.63	8.81	4.18	17.22	20.6	50.38	44.07	4.66	1.69	40.07	35.44	10.72	4.78	14.88	30.76	29.35	5.2	12.76	5.41	1.09	12.03	13.97	8.98	18.27	6.28	30.71	15.95	8.88	11.76	35.5	1.57	18.21	12.84	14.55	28.56	38.69	26.48	12.76	15.83
Chr1_111670662_112089668	KCND3	12.71	22.38	0.48	15.55	8.45	7.77	4.22	7.12	10.63	30.18	8.85	5.14	18.06	23.04	46.25	44.01	8.16	2.16	38.49	34.76	11.12	4.53	14.52	29.13	30.9	5.84	13.78	6.34	1.36	11.72	12.47	8.84	18.63	6.31	29.86	15.76	8.97	12.02	34.81	2.05	17.79	13.12	15.28	31.3	35.43	30.37	13.56	16.76
Chr1_117763485_118029621	GDAP2	12.48	20.3	0.42	15.86	9.79	4.42	2.24	4.08	15.27	35.67	8.3	3.52	18.71	20.06	51.33	49.64	4.16	1.27	41.6	34.64	10.5	4.99	15.22	30.77	34.15	6.68	16.54	5.1	0.85	13.51	13.66	9.23	20.22	5.89	29.22	16.39	12.83	11.21	44.08	1.22	17.36	14.39	18.58	39.85	36.34	37.98	12.31	14.81
Chr1_118931216_119240654	WARS2	13.96	23.51	0.54	14.99	8.37	5.74	2.6	4.43	13.61	32.54	7.49	4.61	18.72	18.52	48.76	45	7.05	1.95	37.82	36.77	11.04	4.86	15.96	29.79	34.7	6.13	14.79	5.79	1.16	12.51	13.03	9.29	19.14	5.6	31.93	15.23	11.17	12.04	36.62	2.09	17.13	14.2	17.4	37.29	35.7	41.36	12.88	16.22
Chr1_119548411_119844218	PHGDH	14.37	21.18	0.48	16.37	7.98	5.18	2.82	5.6	11.72	31.9	8.71	3.97	17.91	21.77	50.41	44.1	6.62	1.69	41.27	34.25	12.92	4.49	13.34	33.5	32.87	5.72	15.19	5.67	1.06	12.94	13.9	9.79	19.09	6.28	30.04	16.61	9.81	10.62	38.67	1.42	16.96	13.77	15.04	33.13	38.52	34.09	14.61	17.43
Chr1_12130030_12612047	VPS13D	14.44	22.03	0.51	14.85	8.63	8.98	4.59	7.74	11.97	33.29	8.47	5.74	18.7	22.45	47.04	48.15	7.8	2.65	37.84	33.77	11.22	5.13	15.2	31.35	30.6	6.28	13.65	5.59	1.44	12.67	14.4	9.27	18.37	5.52	29.24	16.3	9.88	11.16	36.38	2.28	18.86	13.54	14.26	31.36	38	29.81	14.07	16.5
Chr1_1412162_1640624	VWA1;ATAD3A;TMEM240	13.79	26.79	10.4	15.92	8.15	3.08	1.48	3.89	7.63	28.58	8.05	2.79	18.51	24.55	46.28	40.72	2.88	1.05	35.54	37.57	10.69	4.82	13.26	25.77	22.31	5.91	12.42	5.12	0.57	12.39	15.9	8.81	15.89	6.32	30.3	15.73	6.41	12.74	18.31	0.85	18.1	13.99	9.72	23.66	32.32	17.43	12.6	15.24
Chr1_149290614_149568030	NOTCH2NLC	17.11	24.84	9.14	15.06	9.64	3.29	2.19	3.89	8.92	27.97	4.23	3.6	20.56	21.5	23.47	31.4	4.59	0.89	26.55	24.68	8.76	4.84	16.09	24.73	23.44	5.31	10.69	4.18	1.02	9.45	10.08	8.1	9.71	5.27	25.32	14.29	7.35	10.9	27.74	1.28	13.99	14.15	7.76	26.72	24.14	23.43	9.99	13.08
Chr1_155510205_155714951	MSTO1	14.19	26.93	0.54	14.37	8.68	1.6	0.72	2.09	13.58	34.33	9	2.64	20.08	22.33	47.7	40.72	2.11	0.74	39.15	33.74	11.72	5.1	16.95	32.43	32.68	5.6	12.97	6.63	0.6	12.19	13.64	9.54	18.74	6.14	28.11	16.93	11.17	12.09	35.18	0.58	19.07	14.73	15.16	31.98	31.63	30.05	13.26	17.24
Chr1_156491756_156709507	NAXE	12.49	22.6	0.54	16.36	8.98	1.77	0.69	2.65	9.47	26.08	7.56	2.76	17.92	22.17	42.49	36.26	2.57	0.92	35.97	35.26	11.33	4.38	12.95	30.07	27.98	6.68	13.5	5.96	0.69	12.61	14.51	8.75	17.41	6.82	28.36	15.97	7.96	10.07	28.04	0.6	16.07	13.74	11.76	28.93	33.31	26.68	14.31	16.92
Chr1_159898651_160170160	KCNJ10	12.32	25.65	0.5	15.54	8.65	3.81	2.26	3.96	10.59	28.83	8.56	4.25	18.84	23.06	45.62	44.54	5.66	1.28	37.72	34.68	11.43	4.69	15.72	29.05	25.1	6.71	12.16	5.76	0.85	11.79	12.97	9.3	18.73	6.41	30.27	16.74	8.84	10.93	35.01	1.53	17.37	13.49	14.6	29.91	36.91	27.5	12.97	16.04
Chr1_16885958_17111928	ATP13A2	16.23	32.6	0.65	17.06	9.37	2.06	1.44	3.22	11.87	35.3	10.95	2.85	21.8	26.98	49.41	42.45	2.63	1.14	38.4	43.25	11.31	5.14	16.94	34.1	30.76	6.36	12.32	6.33	0.76	11.57	17.17	9.81	18.58	6.24	35.81	17.52	10.04	11.35	40.47	0.91	20.85	17.48	14.09	32.03	44.58	29.97	13.49	17.31
Chr1_173724653_173958808	DARS2	13.23	23.55	0.48	14.58	9.13	3.09	1.83	2.82	15.82	37.72	8.35	3.11	18.2	21.26	50.4	46.76	2.95	1.17	40.44	31.55	9.27	5.92	14.61	32.97	30.92	5.94	16.75	5.05	0.72	11.53	14.73	9.49	19.72	5.87	32.02	16.44	13.23	11.88	43.63	0.83	16.85	14.38	17.71	35.88	39.89	36.51	14.14	16.67
Chr1_183951651_184223978	TSEN15	12.99	24.48	0.52	14.29	8.05	4.28	2.07	5.01	15.24	33.72	8.22	4.26	17.95	20.79	51.95	42.36	4.89	1.35	40.61	34.57	9.85	4.64	15.02	31.57	38.14	6.68	14.64	5.45	1.07	11.6	14.13	10.13	19.91	6.25	30.79	16.56	12.96	11.67	39.48	1.54	18.16	13.89	18.57	35.35	37.38	41.3	14.56	18.14
Chr1_18974510_19310266	UBR4	12.2	22.03	0.52	15.77	8.98	5.91	3.84	5.85	10.55	32.97	9	5.36	18.88	24.3	44.45	47.08	6.51	2.02	39.49	34.05	10.8	5.03	13.99	31.11	31.06	6.22	13.43	5.07	1.45	12.64	14.15	9.4	17.95	6.51	29.49	16.08	8.68	11.85	37.98	1.54	17.5	13.79	13.95	31.62	40.08	28.86	15.2	15.24
Chr1_212758275_212999363	FLVCR1	12.7	24.66	0.52	14.85	7.56	3.69	1.78	4	13.23	35.75	9.65	2.99	17.51	21.65	44.54	44.74	3.55	1.17	38.69	33.91	9.59	4.79	14.53	32.46	29.75	5.8	14.79	4.62	0.7	12.35	13.13	9.46	19.82	6.2	30.83	15.78	10.88	12.03	35.7	1.09	18.41	13.54	16.44	36.61	39.27	31.68	12.48	16.75
Chr1_226840286_227087544	COQ8A	12.67	25.26	0.48	13.39	8.59	2.77	1.61	3.15	13.81	34.63	7.72	3.18	20.3	20.82	49.59	44.47	4.06	1.64	35.89	32.74	11.95	4.75	15.17	31.12	34.31	5.86	13.29	6.72	0.79	11.72	13.77	9.25	18.91	6.23	30.49	15.61	11.52	11.31	31.08	1.16	18.97	14.17	16.9	32.04	36.95	33	14.1	16
Chr1_228049930_228259826	GJC2	11.84	23.68	0.48	14.83	8.37	2.19	0.67	2.44	10.17	29.43	9.07	2.55	19.47	24.45	45.51	41.14	1.76	0.87	36.35	33.39	11.01	4.62	13.52	29.62	27.56	5.76	12.63	5.37	0.67	10.9	11.95	8.51	16.66	5.77	27.97	16.39	8.68	12.67	29.66	0.88	16.73	13.14	9.82	24.63	33.78	18.18	11.58	16.18
Chr1_235267360_235604452	TBCE;B3GALNT2	13.38	20.89	0.54	15.35	8.8	6.42	2.9	6.5	14.61	38.56	8.42	4.84	19.14	22.11	48.6	42.53	6.59	1.92	42.27	33.86	12.43	5.48	17.06	33.15	32.88	6.13	13.15	7.21	1.03	12.36	13.31	10.03	19.21	6.12	29.77	16.85	11.98	13.16	37.57	1.47	18.59	13.74	16.12	31.03	34.45	33.42	12.03	16.97
Chr1_244735616_244945057	COX20	14.96	21.14	0.48	13.87	9.57	1.76	0.88	2.44	12.58	38.68	8.09	2.79	18.04	25.59	46.44	45.36	1.98	0.91	37.57	35.13	10.48	5.74	14.74	33.58	29.24	7.17	12.96	6.77	0.58	13.19	14.73	10	19.02	6.05	32.64	16.95	10.5	12.23	33.25	0.77	17.65	13.44	15.81	30.62	34.39	35.02	12.8	17.51
Chr1_26332282_26571306	DHDDS	13.55	21.13	0.47	14.31	9.11	3.5	1.33	3.2	9.46	33.4	8.19	3.18	18.86	20.75	47.13	41.64	3.47	1.21	36.64	32.74	10.36	5.2	15.15	29.67	27.67	6.59	12.95	6.14	0.86	12.69	13.14	9.46	17.85	6.56	27.64	16.46	7.51	12.11	35.34	1.39	18.82	14.47	13.31	30.03	35.64	26.25	13.72	16.83
Chr1_26998809_27266981	SLC9A1	12.1	22.87	0.54	14.7	8.05	4.05	2.67	4.13	12.04	32.82	8.9	3.6	19.6	22.63	48.22	41.29	3.23	1.29	36.04	33.36	9.57	5.66	14.94	32.97	26.22	6.04	12.54	5.9	0.77	13.87	14.2	9.91	18.34	6.12	30.32	16.31	9.99	11.39	31.01	1.7	18.84	14.27	12.82	29.18	35.21	24.95	12.38	17.38
Chr1_30831506_31165991	PUM1	13.94	26.9	0.45	15.99	8.84	6.82	3.17	6.17	13.03	35.74	8.64	4.12	19.85	22.4	45.23	45.69	6.62	2.01	40.01	34.67	11.59	5.24	16.64	31.95	29.1	6.66	13.22	5.65	1.09	12.18	12.24	10.19	18.18	5.89	28.52	17.34	10.87	10.98	37.37	1.81	17.89	14.15	14.01	31.59	36.25	34.27	13.72	17.44
Chr1_35988892_36193932	ADPRS	13.43	23.75	0.54	13.23	7.73	1.33	0.65	2.4	11.89	28.43	8.38	2.27	21.25	24.28	48.15	44.57	1.4	0.78	36.44	32.77	10.46	5.55	15.43	29	29.19	6.82	11.02	6.55	0.62	13.76	11.63	9.52	18.67	5.94	28.64	16.71	9.52	11.73	27.85	0.56	17.98	14.87	15.18	30.93	37.99	26.42	13.87	16.17
Chr1_42707052_43058893	SVBP;SLC2A1	13.01	22.27	0.47	14.19	7.98	3.21	1.01	3.43	10.57	32.28	8.68	3.23	16.6	21.75	45.5	43.66	2.91	1.12	38.9	34.81	11.61	5.08	14.13	29.87	27.7	5.62	14.93	4.9	0.75	12.52	14.42	8.9	18.85	5.83	31.21	16.44	8.81	11.31	32.35	0.83	18.91	14.43	13.39	31.95	39.89	29.58	12.95	17.12
Chr1_44305194_45086722	RNF220;EIF2B3	13.56	24.41	0.5	15.28	8.73	6.68	3.91	6.67	11.51	32.06	8.73	5.4	19.42	22.49	50.19	44.6	7.4	2.09	38.59	34.73	11.16	4.88	16	30.79	30.84	5.93	13.23	6.26	1.27	14.14	14.97	9.22	17.95	6.21	30.64	16.67	9.53	10.72	39.16	2.06	17.41	13.69	15.65	31.65	38.66	30.89	14.17	16.23
Chr1_45240052_45613382	MMACHC;TOE1	13.67	25.17	0.48	16.08	8.87	1.62	0.84	2.42	12.83	34.98	8.53	2.76	18.92	23.25	46	45.77	1.68	0.71	38.89	32.06	10.03	5.47	13.69	31.67	29.89	6.3	13.19	5.83	0.64	12.52	14.04	10.13	18.42	5.44	29.4	17.1	10.42	11.37	36.64	0.69	18.19	15.07	15.2	32.13	36.18	36.69	13.32	16.3
Chr1_46088683_46320305	POMGNT1	12.08	23.27	0.57	15.27	8.89	2.83	2.22	3.67	12.69	36.55	8.21	2.98	17.44	23.88	46.31	39.16	2.4	1.14	40.86	34.84	10.82	5.01	12.94	31.02	35.37	5.79	12.14	5.31	0.67	12.51	13.63	10.06	18.53	6.82	29.98	16.88	10.28	12.3	42.15	1.11	18.08	13.07	14.01	30.31	36.11	27.33	12.99	16.57
Chr1_52584449_52798347	COA7	13.62	21.59	0.47	15.5	8.67	2.01	1.08	2.56	13.89	35.15	8.24	2.89	18.43	21.47	44.36	43.13	2.01	0.84	34.71	34.21	12.73	5.74	16.51	31.53	28.71	7.14	14.28	7.11	0.7	11.52	13.31	9.92	18.56	6.34	33.15	17.25	11.66	11.03	34.49	0.69	17.23	14.47	13.98	30.19	36.09	28.18	14.66	17.07
Chr1_56894778_58646734	DAB1	13.18	23.44	2.55	15.93	8.56	12.06	6.57	10.35	13.16	33.29	7.95	7.88	19.37	20.52	51.23	46.45	12.11	3.48	38.99	33.74	10.74	4.83	13.92	31.05	34.96	5.89	15.38	6.18	1.82	12.06	14.28	9.28	19.08	5.99	30.75	15.92	11.01	11.73	39.61	3.24	18.72	13.67	19.27	36.42	38.23	37.52	12.96	15.87
Chr1_6685454_7869706	CAMTA1	12.93	23.46	0.5	15.73	8.72	10.95	6.7	10.02	10.85	30.85	8.32	7.6	18.76	23.38	48.69	44.33	11.02	3.35	38.48	36.66	11.15	4.91	14.06	30.57	27.9	6.03	13.23	5.93	1.77	12.88	13.95	8.88	18.45	6.01	29.87	15.7	9.09	11.71	35.44	3.3	17.93	12.84	14.45	30.91	37.58	28.39	13.76	17.15
Chr1_94318389_94618666	ABCD3	12.06	24.98	11.62	14.46	8.13	4.89	2.55	5.2	13.77	34.46	8.3	4.44	20.34	21.46	54.17	43.81	5.17	1.57	40.57	33.12	10.13	4.78	15.87	30.54	32.84	6.27	14.35	7.19	1.25	13.05	14.78	9.21	19.82	6.05	31.38	15.91	11.5	11.68	38.14	1.44	18.01	14.12	19.74	36.66	40.57	36.17	13.56	16.11
Chr10_100132298_100367680	CWF19L1	13.71	24.09	0.49	15.02	9.39	2.68	1.54	3.15	12.7	33.59	9.03	3.52	18.41	20.05	46.3	40.7	2.94	0.96	39.37	35.04	9.76	5.68	15.19	31.51	33.52	6.46	16.22	6.73	0.91	11.89	15.66	10.42	18.93	5.6	30.98	16.4	10.55	11.03	36.76	0.79	18.38	13.41	14.76	33.95	31.57	31.12	12.99	16.88
Chr10_100887367_101094403	TWNK	12.98	26.97	0.54	15.94	8.9	1.68	0.64	2.1	10.6	31.25	7.99	2.46	17.06	23.67	46.09	40.56	1.39	0.59	33.06	34.22	10.08	5.4	14.43	29.63	24.17	5.74	13.4	5.86	0.87	13.31	14.58	8.53	17.18	6.27	29.59	16.52	8.93	11.28	31.71	0.57	19.33	12.36	14.62	27.94	40.99	21.96	12.84	14.1
Chr10_102403972_102733535	SUFU	12.01	24.84	0.47	13.97	8.29	6.16	3.76	5.99	10.59	27.71	8.9	4.8	19.96	22.8	52.3	43.9	6.21	1.95	37.56	34.99	10.96	5.25	13.56	31.2	26.3	6.37	10.6	6.87	1.08	12.41	12.26	8.37	17.58	5.86	26.45	15.96	8.79	11.25	31.23	1.92	18.78	14.39	12.53	28.79	33.7	24.46	13.5	16.89
Chr10_119067720_119278812	PRDX3	12.46	26.75	0.47	15.76	8	2.38	0.85	2.42	12.02	31.75	8.84	2.76	18.13	23.84	43.68	46.18	1.83	0.85	36.94	31.63	10.81	6.12	16.95	31.48	28.58	5.88	10.77	6.1	0.59	13.3	12.28	9.32	19.13	6.54	27.58	16.74	9.97	12.76	32.42	0.84	18.21	14.65	12.95	30.87	34.87	29.23	12.67	18.73
Chr10_129735233_130073053	EBF3	12.07	24.42	0.43	15.43	9.55	6.89	3.07	5.01	10.15	28.02	7.93	4.26	18.37	21.24	45.37	45.9	5.41	1.82	37.1	36.08	10.7	5	12.27	31.9	28.34	5.71	12.7	5.74	1.21	12.17	13.41	9.09	17.9	6.24	28.15	15.53	8.59	13.74	34.88	1.62	17.94	12.43	14	29.62	36.01	31.21	12.62	14.91
Chr10_13177796_13402412	PHYH	14.65	24.19	0.5	15.1	9.04	2.73	1.37	2.77	12.15	33.29	8.34	3.13	19.52	19.78	46.58	40.88	2.83	1.42	37.83	31.64	11.36	5.33	18.48	35.42	28.85	6.65	13.94	5.33	0.72	14.48	14.38	10.59	18.64	6.68	28.7	15.87	9.96	12.56	35.68	0.82	19.86	14.46	14.47	28.54	39.53	31.3	12.26	17.79
Chr10_132683179_132886147	NKX6-2	11.78	21.79	0.52	15.33	9.67	1.24	0.79	1.94	8.29	23.3	7.15	1.93	14.66	24.66	39.26	39.05	1.51	0.52	33.79	34.08	11.29	3.97	12.9	28.28	22.34	4.56	10.19	6.19	0.52	10.72	11.94	7.38	16.63	6.24	28.53	14.59	7.28	11.49	25.59	0.69	14.68	12.93	9.38	22.4	35.62	16.04	12.66	14.41
Chr10_23092312_23294245	PTF1A	13.46	20.49	0.49	15.07	9.49	1.57	0.65	1.97	13.81	33.05	7.78	2.24	17.81	19.71	46.73	45.81	1.5	0.57	36.31	30.16	9.87	4.66	13.53	30.71	34.18	5.76	14.97	5.42	0.52	12.7	13.41	9.51	18.91	5.68	30.67	15.92	11.44	11.06	38.11	0.44	17	14.28	17.11	36.48	37.49	35.01	12.79	16.48
Chr10_27068135_27343046	ACBD5	11.65	18.54	0.42	11.93	7.33	4.7	2.27	3.9	15.78	37.19	8.23	3.74	18.48	18.41	45.62	45.68	4.13	1.85	30.93	31.21	10.76	4.55	13.57	29.43	33.73	4.89	14.06	5.89	0.87	10.25	13.51	9	17.82	5.49	26.66	15.29	13.19	10.89	38.86	1.59	16.27	12.71	16.21	35.13	31.78	37.86	13.4	14.81
Chr10_30209801_30474448	MTPAP	12.57	24.82	0.57	13.53	8.65	4.32	1.81	3.95	13.59	39.75	8.18	3.84	20.83	22.47	50.56	44.66	4.83	1.11	37.72	31.87	10.64	5.75	14.12	34.22	28.59	5.88	15.38	6.33	1.02	12.65	13.11	9.97	18.97	6.55	29.83	16.92	11.3	12.24	40.94	0.88	18.77	13.97	17.17	32.82	35.45	30.69	13.83	16.99
Chr10_3037728_3272841	PITRM1	11.81	22.44	0.58	15.3	8.4	3.49	1.26	3.59	10.11	31.01	7.77	2.92	19.08	21	45.76	43.89	2.83	1.18	36.07	33.9	10.37	4.7	12.78	30.16	26.04	6.26	12	5.99	0.91	13.35	14.91	9.21	18	6.32	28.55	17.16	8.42	11.08	30.74	1.28	16.55	12.08	13.47	31	35.64	28.13	13.7	15.59
Chr10_77875149_78129515	POLR3A	11.84	21.31	0.48	13.02	8.25	4.05	1.37	3.22	10.28	30.15	6.77	3.5	16.05	18.63	43	39.9	4.49	1.04	36.28	34	8.66	5.18	15.73	27.39	26.93	6.46	11.02	6.1	0.8	10.98	11.29	8.4	16.63	5.52	25.55	14.51	8.56	11.53	32.6	1.22	16.94	11.45	13.12	28.26	32.8	28.91	10.97	14.29
Chr10_79715885_79941573	NUTM2B-AS1	11.79	21.59	18.23	16.34	8.36	1.85	0.95	2.68	14.64	30.86	7.61	2.68	19	17.42	43.03	34.52	3.38	0.88	33.51	27.15	10	4.43	15.64	37.7	31.18	5.95	12.91	5.58	0.8	12.27	12.96	8.4	16.25	5.18	27.89	15.03	11.98	10.29	32.43	0.73	16.9	14.15	16.39	34.67	32.27	35.46	11.52	14.29
Chr10_87404875_87653461	MINPP1	13.62	24.65	4.05	15.59	9.61	3.63	2.52	3.43	15.41	37.96	7.53	2.94	20.21	22.99	43.86	42.34	3.57	1.22	36.96	32.7	10.87	5.69	14.63	32.2	30.57	6.62	17.42	7.6	0.86	11.41	11.48	9.92	17.49	5.52	29.65	15.29	12.8	11.57	39.26	1.08	18.2	14.8	18.94	36.44	32.41	37.12	13.05	16.58
Chr10_93567883_93802592	FRA10AC1	13.52	22.49	16.35	16.19	8.11	3.42	1.98	2.94	13.94	35.37	7.91	3.31	17.85	22.52	51.52	43.15	2.77	0.95	35.76	36.07	10.51	4.76	12.57	31.93	35.74	5.31	13.96	5.35	0.8	12.77	13.37	9.82	18.79	6.29	28.75	15.92	11.42	12.16	38.31	0.97	19.28	13.01	17.96	35.95	32.16	37.2	13.29	16.49
Chr10_95559823_95794143	TCTN3	13.5	21.67	0.49	14.22	8.83	3.37	1.24	3.57	15.73	35.5	8.65	3.1	18.63	21.69	51.82	45.61	3.01	1.44	38.02	32.8	11.91	5.46	14.07	34.19	30.35	6.46	13.74	6.06	0.75	13.04	14.26	9.94	19.61	5.98	30.76	16.69	12.67	12	35.47	0.8	17.63	14.41	18.3	35.38	36.18	34.66	14.67	16.9
Chr11_108123044_108469102	ATM	12.59	23.2	0.44	14.68	8.16	6	3.69	5.54	16.29	39.63	8.88	4.31	20.07	20.73	52.4	46.48	6.65	2.08	38.86	33.17	11.65	4.86	15.52	31.57	35.15	6.36	15.51	5.71	1.39	13.01	13.77	9.73	19.16	5.78	30.9	16.24	13.63	11.18	38.78	1.84	19.03	14.54	20.85	36.05	33.55	39.72	12.75	16.51
Chr11_119106298_119413926	CBL	13.48	26.77	13.5	13.95	9.2	5.51	3.09	5.49	11.95	32.85	8.66	4.77	18.75	22.2	45.91	44.68	5.94	1.54	36.55	35.22	10.96	5.69	15.8	30.72	30.41	6.33	13.99	6.19	0.97	12.32	13.44	8.99	17.58	6.11	28.73	16.47	9.99	11.23	36.16	1.69	17.75	14.25	15.61	30.38	40.2	28.93	13.92	16.16
Chr11_124765432_124981471	ROBO3	13	23.95	0.49	13.41	8.32	1.77	0.7	2.59	11.57	33.62	9.03	2.96	17.92	21.08	41.16	41.58	2.05	0.82	37.25	32.05	10.93	5.33	13.62	28.66	31.95	5.72	13.8	4.49	0.54	11.79	14.05	8.72	18.26	6.35	29.66	15.82	9.7	10.68	38.37	0.64	19.91	13.62	16.4	32.88	33.33	33.98	13.11	16.76
Chr11_31684779_31917961	PAX6	14.24	20.04	0.43	14.25	9.32	2.64	1.64	3.69	14.72	35.52	8.34	3.05	17.71	20.92	50.57	46.89	2.84	0.87	37.95	33.15	11.47	4.96	13.82	31.75	35.45	6.47	14.4	5.48	0.75	12	12.77	9.12	18.42	5.86	30.19	14.73	12.03	10.99	34.95	0.98	17.07	13.43	19.26	35.8	35.58	37.43	13.47	16.52
Chr11_45809663_46018812	PEX16	11.25	23.1	0.49	14.91	8.37	1.84	0.98	2.76	10.8	31.77	9.14	2.39	17.14	19.83	45.68	40.93	1.99	0.76	38.54	33.98	10.83	4.8	14.68	28.41	31.12	7.01	12.08	4.83	0.6	12.57	12.2	8.74	18.91	6.04	30.55	15.12	9.04	11.58	32.82	0.63	18.27	13.34	13.31	31.83	35.44	25.08	12.91	16.81
Chr11_57548188_57761865	CLP1	12.58	24.51	0.53	15.2	8.23	1.93	0.67	2.81	12.85	31.99	9.92	2.51	22.03	23.46	51.19	43.37	1.95	1.05	37.16	34.57	9.82	5.21	14.85	32.38	27.27	6.53	14.48	8.21	0.56	11.97	12.1	9.58	19.48	6.1	29.14	17.42	10.93	11.97	32.87	0.68	20.44	14.5	13.41	31.12	33.64	29.76	13.08	17.48
Chr11_61261964_61498866	TMEM216;TMEM138	12.39	23.59	0.5	15.23	8.81	2.73	0.9	3.18	10.28	27.43	9.01	2.37	18	23.03	51.81	47.51	2.28	0.85	37.41	35.51	11.07	5.27	14.55	29.57	29.3	6.52	12.66	5.67	0.58	13.14	13.22	9.09	18.81	6.08	30.03	15.74	8.53	13.04	32.92	0.65	18.37	15.02	14.18	30.88	34.95	26.96	12.71	15.81
Chr11_65080566_65312006	CAPN1	12.02	24.04	0.6	14.3	8.72	2.28	1.4	3.14	10.5	32.93	7.92	3.3	20.18	23.2	43.32	40.39	3.22	1	37.41	35.68	10.37	4.1	16.49	28.87	30.06	6.2	11.62	6.04	0.81	12.2	12.72	8.74	18.52	6.39	31.5	16.69	8.91	12.73	29.28	1.09	16.99	14.38	13.53	28.74	35.83	25.14	12.19	16.55
Chr11_6512768_6719448	TPP1	11.6	24.38	0.44	16.28	8.94	1.53	0.79	2.43	12.31	34.11	8.42	2.29	19.56	22.11	45.51	43.61	1.63	0.83	35.68	32.26	10.38	4.36	14.37	31.11	31.22	5.14	15.97	4.14	0.68	12.45	12.92	8.83	18.33	5.78	29.41	15.95	10.46	10.78	36.45	0.69	16.2	13.1	14.7	34.25	34.77	29.93	12.19	16.29
Chr11_65425077_65638704	SCYL1	11.61	23.44	0.47	14.61	9.31	1.45	1.17	2.06	10.92	33.15	8.84	2.83	18.33	23.66	50.64	41.56	1.55	0.57	36.52	32.95	12.62	5.55	14.02	27.56	23.64	6.12	11.67	7.77	0.62	13.01	12.92	9.08	17.01	7.07	27.62	16.42	9.22	12.4	26	0.64	17.32	14.49	12.37	24.88	34.57	21.01	14.2	14.75
Chr11_66245374_66943516	SPTBN2;B4GAT1;TOP6BL;BBS1	12.74	25.21	5.67	14.32	9.09	4.48	2.13	4.52	10.41	32.47	8.35	4.28	20.15	23.54	49.44	45.8	4.64	1.33	36.94	35.48	10.69	5.25	14.3	30.65	29.86	6.17	11.77	7.15	0.92	13.03	14.36	9.07	17.77	6.35	30.56	16.37	8.69	11.89	32.77	1.19	18.9	13.83	13	28.51	38.81	24.11	13.47	16.25
Chr11_72089558_72296323	FOLR1	12.12	22.26	0.54	15.14	9.39	1.51	0.97	2.13	11.13	29.5	9.01	2.3	17.58	22.88	41.39	42.27	1.58	0.92	35.33	29.79	11.22	4.64	14.38	31.3	28.75	5.34	11.94	5.51	0.58	13.08	14.93	9.16	18.12	6.79	28.71	15.08	9.23	11.77	31.04	0.7	20.11	13.15	14.89	29.97	33.39	27.71	11.23	14.97
Chr11_94315570_94593885	MRE11	13.22	24.37	0.48	15.7	8.91	5.63	2.89	4.83	15.65	40.58	8.8	3.65	21.23	20.91	48.57	46.11	5.65	1.64	36.77	36.96	11.66	4.89	15.09	32.28	39.82	5.5	15.54	6.94	0.9	12.75	13.04	9.76	19.58	6.22	29.07	16.86	13.22	10.88	37.84	1.59	18.57	15.03	16.74	35.43	38.63	35.94	12.98	17.19
Chr12_106257748_106610198	POLR3B	13.57	23.81	0.51	16.74	9.12	5.85	3.35	6.87	13.68	36.33	8.73	4.51	18.06	21.34	49.47	44.22	6.47	1.72	39.38	34.47	12.87	5.39	16.04	30.88	34.01	6.34	14.5	5.18	0.93	12.58	12.3	9.39	18.94	5.91	28.77	15.18	11.41	12.6	37.37	2.01	17.88	13.93	18.2	33.31	36.53	35.85	12.31	15.68
Chr12_109473255_109698125	MVK	12.91	26.11	0.46	17.72	9.36	1.92	1.48	2.57	7.68	29.05	8.87	2.68	17.9	20.8	46.24	42.26	3.07	1	35.5	33.53	10.08	4.36	16.19	27.8	24.46	6.09	10.41	8.04	0.6	12.69	13.1	8.76	17.84	6.4	30.02	16.69	6.44	11.77	28.91	0.7	16.66	13.38	12.4	30.16	34.22	27.27	14.38	15
Chr12_110514027_110763431	TCTN1	12.57	24.59	0.49	14.29	8.95	3.91	1.37	4.22	12.32	33.49	8.8	3.05	17.29	22.66	53.46	44.07	3.68	1.01	39.13	32.1	11.22	6.1	14.3	32.63	29.53	6.56	15.15	6.43	1.06	11.99	12.91	9.73	18.28	5.98	31.3	15.65	10.24	11.36	34.98	1.02	17.88	14.14	15.4	31.53	35.14	29.01	13.57	18.06
Chr12_111343485_111699676	ATXN2	14.5	26.07	11.64	14.41	9.59	6.4	3.13	6.69	13.44	35.52	9.07	4.87	20.58	21.13	49.02	46.06	7.39	1.87	39.45	35.68	12.55	5.49	16.42	31.55	29.21	6.49	12.27	5.85	1.33	13.07	14.33	9.65	17.85	5.87	29.83	16.92	11.03	11.43	33.93	1.91	18.39	14.13	15.58	31.14	33.82	29.14	13.88	17.47
Chr12_123370054_123808399	TCTN2;EIF2B1;RILPL1	13.05	25.77	8.46	14.35	9.35	4.8	2.33	4.6	12	33.68	9.14	4.02	19.38	22.2	49.42	43.65	4.38	1.53	36.5	35.6	10.85	6.28	14.6	30.71	27.64	6.86	13.59	6.23	1.02	13.33	12.84	9.94	18.62	5.99	29.33	15.98	9.8	11.27	31.35	1.19	19.02	14.18	15.29	30.16	36.38	30.04	13.74	16
Chr12_42356757_42690355	PRICKLE1	12.14	22.52	0.48	15.76	8.69	6.03	3.54	5.04	15.18	39.64	9.23	4.71	20.51	21.06	45.02	46.73	6.15	1.66	36.8	31.25	9.97	5.02	15.47	33.52	33.65	6.9	13.33	6.02	1.3	12.21	12.05	10.15	18.84	6.3	30.09	16.74	12.58	11.69	37.49	1.36	17.5	13.59	16.97	34.23	35.58	38.29	13.49	17.38
Chr12_4809905_5018256	KCNA1	13.41	24.44	0.47	16.09	9.8	1.7	0.9	2.05	10.53	33.42	8.13	2.36	17.6	20.06	42.42	41.3	1.85	0.73	39.31	33.69	10.92	4.89	14.19	31.1	34.9	6.01	15	5.31	0.53	11.92	14.75	9.43	17.86	6.06	28.4	16.6	8.78	11.35	36.45	0.78	19.08	13.78	13.26	30.75	37.42	31.69	12.12	15.91
Chr12_49084686_49289080	TUBA1A	14.7	24.83	0.46	14.47	9.13	1.26	0.55	2.26	12.58	34.15	8.98	2.45	18.89	19.97	52.1	46.21	1.81	0.69	34.52	34.01	12.39	5.04	12.95	31.27	28.43	5.99	14.01	6.49	0.73	12.79	11.51	9.63	19.42	6.59	31.24	16.48	10.4	9.56	33.4	0.49	18.73	14.21	13.03	30.36	35.81	27.31	13.14	17.28
Chr12_50404985_50848657	DIP2B	12.94	24.88	9.35	14.27	9.54	8.26	4.22	7.08	15.81	39.21	9.61	5.49	21.49	22.94	51.63	46.17	8.15	2.15	37.88	34.26	10.21	5.33	15.62	33.96	30.27	6.8	14.25	6.99	1.3	13.32	13.66	9.85	18.85	5.89	30.18	15.9	13.07	11.61	39.7	2.23	17.38	14.18	16.01	35.15	36.07	35.06	13.14	16.74
Chr12_51490266_51912864	SCN8A	12.6	23.36	0.53	14.61	7.77	7.83	3.92	7.61	12.83	31.82	8.17	5.12	20.55	22.76	46.09	44.74	8.36	2.43	38.33	31.9	9.5	4.74	15.8	30.76	28.6	5.82	13.35	5.45	1.18	12.62	12.29	9.24	18.34	5.78	29.61	16.69	10.79	11.29	37.57	2.07	19.27	13.18	16.03	33.4	39.39	32.13	12.44	16.53
Chr12_53207456_53424864	AAAS	11.75	26.28	0.63	14.31	9.7	1.89	1.14	2.97	11.7	30.71	8.95	2.55	18.69	22.09	48.54	44.99	1.98	0.7	35.43	32.35	10.44	6.22	15.54	29.18	29.76	7.04	13.1	5.36	0.64	11.84	13.12	9.25	16.88	6.03	28.5	16.89	9.39	11.83	35.62	0.86	18.53	13.86	14.27	27.94	32.54	23.97	12.5	16.33
Chr12_57682761_57908071	TSFM	13.88	22.22	0.48	14.49	7.94	3.54	1.29	2.87	11.02	32.29	8.04	2.79	18.47	24.51	46.45	46.4	2.86	0.9	38.59	31.86	12.17	4.57	15.31	31.67	30.76	5.86	12.66	6.21	0.75	12.2	13.09	9.14	18.4	6.72	30.11	16.6	9.37	11.25	35.43	1	17.73	15.08	13.68	29.92	33.59	27.86	12.37	17.42
Chr12_6362237_6570677	VAMP1	13.44	24.97	0.45	15.33	9.76	1.9	0.63	2.03	10.15	32.95	8.59	2.48	19.05	22.36	47.7	44.12	2.08	1.15	36.05	30.5	10.89	4.52	11.99	30.87	31.11	6.72	13.76	5.33	0.56	11.72	11.57	9.4	18.5	6.49	27.62	17.05	8.31	11.45	33.61	0.68	17.13	13.69	13.48	29.7	33.93	26.94	12.48	15.78
Chr12_63679833_63909792	RXYLT1	14.05	23.86	0.46	14.44	9.84	2.16	1.22	3.32	16.17	40.17	8.05	2.79	20.61	22.01	46.62	46.79	3.04	0.91	35.08	35.69	10.76	5.62	15.17	35.93	31.56	6.51	14.37	5.76	0.72	13.03	13.07	9.28	19.85	5.75	31.1	16.49	13.38	12.49	37.79	1.19	20.27	15	19.26	38.06	35.62	35	13.6	16.02
Chr12_6824463_7042321	ATN1	11.42	23.91	17.4	15.7	7.12	2.1	1.05	2.17	10.73	35.22	9.06	2.37	15.94	21.34	43.82	41.98	2.03	0.82	36.29	32.14	11.4	4.54	15.08	28.08	30.28	6.73	11.58	5.51	0.61	12.03	12.46	8.59	17.71	6.29	28.65	16.61	9.04	11.94	31.84	0.63	17.44	13.44	12.46	29.76	36.18	25.98	14.07	16.36
Chr12_87949016_88242099	CEP290	12.62	20.48	0.47	15.62	8.68	4.7	2.98	4.81	19.29	44.97	7.7	4.73	21.48	20.98	48.02	49.43	5.39	1.68	37.79	33.53	10.03	4.59	15.92	32.64	39.68	5.51	17.17	5.39	1.15	10.93	13.36	9.47	19.46	5.53	30.47	16.1	15.99	10.59	42.64	1.51	17.53	14.02	20.53	41.44	36.58	45.24	13.62	15.49
Chr13_101610804_102502457	FGF14	13.06	21.86	4.57	15.14	9.32	11.39	5.72	9.28	16.35	40.3	7.72	7.09	20.11	20.46	50.23	45.87	12.3	3.13	38.33	34	10.07	4.87	15.35	31.33	37.74	6.31	15.99	6.39	0	11.86	14.18	9.37	19.27	5.84	31.45	16	13.71	10.7	44.45	2.74	18.65	13.73	21.74	39.83	34.65	40.85	13.45	16.37
Chr13_23188689_23533763	SACS	12.69	24.93	0.54	15.65	8.25	6.39	3.46	6.06	15.52	38.18	8.57	5.01	20.11	20.81	52.58	47.58	6.32	1.53	37.52	33.96	11.3	4.81	15.01	33.15	31.99	5.88	14.63	6.25	0	13.12	13.85	9.56	19.3	5.45	29.67	15.42	12.89	12.17	40.84	1.58	17.27	14.24	18.39	34.67	35.77	34.49	13.42	16.58
Chr13_25271974_26125851	ATP8A2	11.29	22.37	0.46	14.02	7.93	10.3	5.16	8.43	12.21	32.58	7.14	5.79	17.12	18.8	44.97	41.06	9.22	2.63	34.8	32.71	10.14	4.42	13.36	27.92	31.54	5.27	13.08	5.89	0	11.69	11.5	8.24	16.95	5.15	25.87	13.77	10.29	10.8	34.77	2.76	16.46	11.59	16.12	32.22	34.41	32.83	12.16	14.41
Chr13_35950434_36150492	DCLK1	13.07	24.04	15.29	14.75	9.01	1.12	0.57	1.98	14.89	33.91	7.32	2.25	20.2	19.69	48.23	45.14	1.33	0.53	33.2	30.33	9.44	5.23	15.05	31.35	30.32	5.84	15.74	8.03	0	12.21	12.58	9.42	18.15	5.53	30.07	15.96	12.23	12.12	35.79	0.45	16.52	15.48	20.45	35.01	36.32	40.22	11.26	14.57
Chr13_48132612_48370357	ITM2B	12.89	23.48	0.49	15.03	10.19	2.55	1.26	3.52	16.2	37.75	8.18	3.52	20.96	19.97	47.49	45.65	3.25	1.27	37.25	33.81	10.8	5.04	16.02	32.15	37.12	6.16	14.28	7.81	0	12.78	14.47	10.06	19.92	6.31	31.37	17.47	13.56	11.44	37.47	1.34	17.48	16.25	18.29	39.8	33.3	40.33	12.48	17.45
Chr13_70007213_70271738	ATXN8OS	11.94	19.35	11.68	16.27	7.53	4.99	2.24	4.62	17.77	38.85	7.34	3.82	21.22	18.25	44.03	44.46	5.2	1.03	38.53	29.92	11.5	4.83	13.93	32.28	37.48	5.95	19.55	5.35	0	11.64	14.16	9.27	20.9	5.74	30.32	15.93	14.69	11.15	43.69	1.04	16.66	14.66	21.48	43.93	40.54	46.62	12.52	15.45
Chr13_71337966_71967204	DACH1	1.57	0.77	0.44	1.44	1.34	1.06	0.53	2.02	6.52	44.58	2.06	2.33	1.02	1.88	50.27	47.82	1.51	0.58	41.7	33.29	1.31	1.1	0.68	33.43	42.24	1.55	2.31	1.15	0	2.23	1.55	4.24	19.61	1.56	30.75	15.9	5.11	1.87	46.02	0.47	3.04	3.01	1.9	43.74	36.11	48.24	2.73	3.45
Chr13_76890660_77119143	CLN5	14.35	20.02	0.47	17.27	8.43	3.25	1.17	3.03	15.83	35.88	8.26	3.19	20.82	20.44	45.03	47.61	3.89	1.14	40.1	30.62	10.68	4.8	14.72	32.2	34.27	7.1	14.73	6.12	0	11.26	12.16	10.28	19.15	5.58	31.06	16.34	12.76	12.04	44.44	1.34	17.34	13.96	18.37	38.69	34.5	36.6	12.76	18.33
Chr13_78498362_78703552	POU4F1	12.05	25.49	0.53	14.12	8.42	1.16	0.95	2.19	15.65	36.7	6.91	2.16	19.61	20.16	47.1	45.06	1.75	0.72	37.61	34.01	9.95	5.03	16.43	31.82	37.47	6.73	16.81	5.15	0	12.49	13.94	9.27	19.63	5.47	30.46	15.03	13.32	10.36	37.83	0.75	19.17	14.54	21.39	40.67	38.95	34.86	11.26	15.09
Chr13_99881784_100086765	ZIC2	14.09	27.46	17	15.43	9.03	1.56	0.71	2.27	12.64	32.13	8.64	2.56	18.03	22.91	47.94	37.86	1.76	0.65	37.52	33.01	11.24	5.1	15.83	32.88	28.85	6.25	12.07	5.04	0	11.68	14.48	9.28	17.91	6.27	29.28	17.48	10.3	13.52	35.64	0.53	17.65	12.72	14.25	29.88	37.03	30.61	12.59	15.61
Chr14_23221289_23426185	PABPN1	12.6	20.83	17.57	13.44	8.89	1.59	0.75	2.04	11.13	33.16	8.66	2.45	18.84	23.18	42.09	46	1.64	0.83	37.77	33.09	11.35	4.69	16.24	30.26	31.25	6.47	12.78	6.76	0.61	11.77	13.86	8.8	17.26	5.94	30.28	16.89	9.13	12.09	34.8	0.71	18.94	14.12	11.48	32.8	33.98	29.41	13.26	15.96
Chr14_24139643_24342674	TINF2	12.78	25.06	0.47	14.15	8.16	1.57	0.6	1.79	9.11	31.15	8.14	2.36	19.12	21.62	43.33	37.75	1.51	0.64	35.57	36.11	9.02	4.31	13.48	30.12	26.72	6.57	12.29	7.69	0.61	12.85	11.44	8.93	17.67	6.74	29.58	16.76	7.65	11.37	31.22	0.43	17.49	15.06	10.83	28.78	33.3	22.18	14.25	16.07
Chr14_31389956_31961224	NUBPL	12.72	22.21	0.51	14.95	8.91	8.73	4.91	7.92	16.04	38.47	8.3	5.91	19.52	21.05	49.22	42.68	10.58	2.32	39.68	35.39	10.73	5.35	15.61	33.02	35.63	5.93	16.38	5.49	1.67	12.41	14.44	9.32	19.89	5.95	30.61	15.91	13.4	11.39	43.04	2.39	17.92	15.25	19.81	38.02	37.87	38.11	13.43	16.87
Chr14_36416392_36621149	NKX2-1	13.05	26.29	0.48	14.93	8.77	1.36	0.87	2.05	14.74	37.58	6.45	2.46	18.37	19.75	43.44	45.85	1.76	0.63	38.03	32.54	11.09	4.14	13.72	31.98	33.15	5.95	14.92	4.23	0.59	11.63	15.7	9.07	19.01	5.43	31.52	16.58	12.41	12.04	38.33	0.6	16.94	12.19	14.61	36.62	38.85	32.6	12.06	16.12
Chr14_67627374_67916590	ZFYVE26	13.02	23.71	0.47	15.8	8.68	4.52	2.26	4.27	14.35	36.41	8.05	4.06	19.6	22.81	47.62	50.31	5.1	1.46	38.27	29.65	10.16	4.85	15.5	30.92	32.02	5.88	13.36	6.25	1.45	11.66	12.13	9.47	19.23	5.88	29.59	16.58	11.5	11.84	39.11	1.42	15.98	14.32	15.96	37.68	35.05	34.49	12.4	17.08
Chr14_74376192_74594177	NPC2	11.41	23.19	0.5	15.5	9.9	1.71	0.96	2.72	10.36	28.59	8.06	3.1	16.21	24.2	46.82	45.08	2.06	1	37.99	33.12	11.43	5.02	14.18	31.02	26.26	6.63	10.99	5.27	0.75	13.78	14.08	8.43	17.2	6.36	29.25	16.52	8.57	12.16	30.5	0.55	18.44	12.79	14.55	31.49	35.28	23.49	12.02	15.65
Chr14_74902921_75112366	EIF2B2	11.27	23.23	0.49	14.52	8.54	1.4	0.95	2.78	11	31.71	8.81	2.4	18.55	21.25	43.41	42.48	1.69	0.54	37.74	30.83	9.42	4.78	16.57	31.06	31.72	6.7	12.84	4.19	0.79	14.23	12.49	9.05	18.92	6.03	28.67	15.71	9.28	13.32	34.81	0.54	18.83	14.35	12.73	31.18	37.32	27.73	12.84	17.95
Chr14_76924543_77128708	IRF2BPL	13.18	24.31	0.5	14.54	9.08	1.17	0.7	1.74	10.49	30.24	8.39	2.44	17.74	23.33	46.92	43.89	1.38	0.65	34.7	34.69	10.12	5.58	14.4	32.41	27.61	6.46	14.75	6.65	0.55	12.34	12.66	8.7	19.09	5.96	32.09	16.83	8.82	11.09	30.19	0.73	19.53	13.41	11.65	30.87	34.38	24.77	13.51	15.82
Chr14_77174956_77420883	POMT2	10.97	22.09	0.54	16.72	7.86	3.1	1.46	3.23	10.96	30.44	8.64	3.48	18.04	23.18	46.61	42.57	3.69	1.13	37.27	36.45	11.02	4.83	14.74	31.61	26.07	5.48	12.26	5.6	0.63	13.68	12.42	9.59	17.84	5.96	27.7	16.52	9.15	12.88	34.39	1.22	18.19	11.88	12.44	29.4	34.8	28.06	16.2	16.23
Chr14_89854939_90144764	TDP1	13.98	21.1	0.45	15.63	8	4.12	2.96	4.43	14.42	34.91	9.41	4.33	19.57	22.01	46.08	43.93	5.56	1.48	39.79	37.12	11.48	5.04	15.41	31.64	33.64	6.76	13.13	5.15	1.12	12.32	13.85	9.22	18.41	6.09	28.34	16.91	12.18	11.91	39.29	1.02	17.22	13.07	16.75	34.51	37.24	33.35	13.88	16.28
Chr14_91171323_91517844	CCDC88C	13.29	24.74	0.49	15.39	9.05	6.98	3.01	5.99	10.92	33.23	9.1	5.14	18.99	22.31	50.57	47.87	6.69	1.62	40.72	34.22	12.19	5.59	15.32	31.57	28.75	6.86	13.29	7.31	1.44	12.58	14.44	9.49	17.93	6.37	28.39	16.05	9.07	11.89	32.42	2.06	18.47	13.38	13.35	30.69	36.08	25.55	13.92	17.01
Chr14_91944496_92206621	ATXN3	13.84	24.99	13.8	15.96	9.02	3.69	2.44	4.68	15.61	39.31	8.76	3.63	19.98	22.13	49.43	43.05	4.61	1.52	37.17	32.67	10.83	5.26	17.17	33.59	35.21	6.25	14.53	6.05	0.86	12.75	13.97	9.22	19.95	5.66	29.8	16.21	12.8	11.14	38.52	0.8	17.39	13.66	16.55	33.38	34.42	33.5	14.08	17.06
Chr14_96697304_97054846	VRK1	12.17	23.33	0.47	15.63	8.6	6.64	3.76	7.04	11.92	32.2	9.29	4.82	20.98	21.31	51.47	42.54	6.41	1.97	38.74	35.98	11.24	5.11	15.21	31.15	34.01	6.73	14.26	5.76	1.1	12.91	14.64	9.23	19.28	6.17	31.44	15.94	10.05	11.6	36.45	1.74	18.77	12.07	16.52	34.53	38.45	34.5	13.03	17.13
Chr15_22673063_22929789	NIPA1	11.58	22.57	14.85	15.12	9.05	3.49	1.93	4.12	12.99	33.49	7.26	3.34	19.8	24.32	47.38	41.34	3.75	1.22	36.76	29.99	10	5.06	13.39	31.57	27.19	5.76	14.33	5.82	1.01	11.03	12.92	8.86	16.63	5.66	26.71	15.73	11.08	10.54	34.41	0.92	17.66	14.12	18.5	32.82	34.63	31.51	12.25	14.9
Chr15_41130839_41381887	CHP1	13.58	24.84	0.69	14.09	8.3	4.29	1.23	3.88	13.39	35.8	9.83	3.6	19.26	22.56	54.05	48.54	3.88	1.38	37.04	35.02	10.6	5.49	14.01	33.82	30.43	6.37	14.61	5.86	1.02	11.77	14.2	9.85	18.68	5.87	29.5	16.41	11.19	10.9	36.34	1.42	17.11	15.45	16.22	31.92	31.61	32.79	13.77	15.16
Chr15_42638730_43020809	TTBK2	14.24	23.28	0.5	14.78	8.5	8	4.13	6.71	14.62	36.12	9.31	5.04	21.16	21.3	50.07	45.26	7.15	1.51	38.32	33.66	12.07	5.48	15.15	30.7	33.43	5.5	15.06	5.76	1.32	12.6	14.01	8.92	17.94	6.01	31.77	16.19	12.2	10.78	39.46	2.01	17.72	14.34	19.29	36.66	36.75	34.2	14.06	16.28
Chr15_51347711_51722833	DMXL2	13.29	21.94	0.46	14.99	8.51	6.36	4.05	6.67	15.03	38.32	8.66	4.71	20.26	21.28	50.15	42.77	7.98	2.08	36.85	32.84	10.76	4.9	15.35	31.92	31.53	5.9	15.3	6.55	1.02	11.94	12.86	9.87	20.26	5.64	28.21	16.23	12.33	11.91	39.18	2.12	18.39	13.74	21.07	35.96	35.12	37.73	14.07	16.11
Chr15_60388284_61329302	RORA	12.88	24.02	0.48	15.01	8.29	11.5	6.05	9.32	13.7	36.34	8.43	7.01	20.42	21.29	49.38	44.78	10.69	3.03	37.95	34.05	10.89	4.76	15.74	31.53	35.79	6	14.49	6.8	1.51	12.7	13.38	9.25	19.3	5.8	29.15	15.75	11.37	12.16	39.62	3.18	17.38	13.65	18.42	34.66	37.48	39.21	13.9	17.54
Chr15_64901512_65129639	MTFMT	12.58	23.65	0.44	15.06	8.19	2.02	1.14	2.74	10.61	31.18	8.28	3.53	18.01	21.49	47.15	45.66	3.11	1.1	36.29	32.64	11.63	5.32	11.21	31.69	31.09	5.8	15.43	6.71	0.61	13.09	12.47	9.13	17.44	6.19	30.57	16.36	8.75	11.51	33.66	0.78	18.96	12.73	13.64	29.77	34.13	32.72	14.3	15.83
Chr15_68106992_68357211	CLN6	13.47	20.99	0.49	15.05	9.02	3.61	2.12	3.82	14.73	31.11	8.8	3.59	18.1	21.43	44.95	40.35	3.9	1.26	40.49	32	11.21	4.76	15.42	32.41	30.29	6.73	13.24	6.19	0.78	12.91	11.7	9.81	17.86	5.8	28.86	17.32	12.16	10.65	33.22	1.26	17.77	13.9	17.88	33.71	35.49	33.61	12.22	16.84
Chr15_72240924_72476420	HEXA	13.35	24.37	0.47	16.22	7.72	2.8	1	3.23	12.4	33.31	8.96	3.25	21.29	20.5	46.89	40.97	3.44	1.35	38.39	32.49	10.52	5.6	14.28	28.91	31.26	6.04	14.62	5.89	0.89	12.11	13.24	10.23	18.92	5.87	30.88	16.8	10.29	11.29	37.24	1.43	17.62	14.81	19.03	32.87	38.78	31.23	12.75	16.79
Chr15_84539285_84754343	WDR73	12.83	21.87	0.5	13.33	9.47	1.9	0.88	2.54	13.94	33.8	8.36	3	20.47	20.95	50.46	43.96	2.66	0.81	36.73	34.34	13.89	5.19	15.89	32.69	31.03	6.27	14.59	9.11	0.77	13.45	15.12	9.03	19	6.69	31.94	16.22	11.81	12.23	31.28	0.65	17.26	15.77	15.51	34.29	36	30.75	12.79	15.94
Chr15_89205198_89434861	POLG	12.76	23.92	0.48	16.46	7.61	2.24	1.68	2.78	10.32	31.54	8.43	2.9	18.99	22.65	46.7	42.9	2.99	1.04	38.45	32.9	12.91	5.44	16.83	28.33	29.48	6.54	13.24	3.97	1.02	12.28	14.17	9.32	17.22	6.33	31.03	15.79	8.7	11.05	32.35	0.95	17.69	11.88	14.7	32.52	35.92	26.7	13.06	15.3
Chr15_89508789_89763086	KIF7	13.44	24.14	0.52	14.4	7.92	3.95	1.77	3.51	12.24	31.5	8.29	3.73	21.63	21.51	48.08	44.38	3.66	1.35	37.46	35.83	11.25	5.26	16	31.77	26.8	5.88	13.17	6.36	0.71	11.76	13.38	9.12	18.37	6.04	31.74	15.72	10.38	12.14	36.65	1.13	18.01	13.11	15.7	29.67	33.1	28.25	14.35	15.65
Chr16_0_153608	POLR3K	10.03	17.59	0.45	14.3	6.81	1.18	0.77	2.24	8.53	21.12	7.31	2.13	16.41	22.1	30.77	40.31	2.07	0.65	27.83	28.27	7.07	4.01	9.96	24.45	18.93	5.64	9.19	4.93	0.62	10.13	11.45	8.04	15.04	6.1	25.03	13.16	7.31	9.08	19.08	0.42	14.14	12.3	7.03	19.29	24.65	16.67	11.96	12.84
Chr16_1053106_1321771	CACNA1H	12.03	24.45	16.37	14.71	8.33	3.93	2.28	4.04	7.05	20.65	7.83	3.99	16	22.7	44.33	38.98	2.98	1.77	32.3	35.18	12.67	4.37	14.49	25.61	21.1	5.83	10.08	5	0.93	11.75	13.81	8.06	15.34	7.18	28.19	15.34	6.02	11.24	26.15	1.22	18.53	12.2	7.19	21.87	31.35	17.92	11.18	14.5
Chr16_13820138_14052348	ERCC4	12.39	21.43	0.41	13.87	8.59	2.78	1.51	3.08	14.04	33.6	8.57	2.8	17.61	20.56	51.65	39.65	2.93	0.87	39.88	33.27	9.42	4.75	13.51	30.61	36.01	5.58	14.32	7.06	0.69	12.6	14.11	9.26	19.32	5.62	31.2	16	11.64	11.99	36.58	0.79	19.73	14.55	15.15	35.39	36.82	33.35	13.18	16.2
Chr16_1606166_1870351	MAPK8IP3	12.07	21.73	0.47	15.47	8.08	4.19	2.22	3.59	9.43	29.3	8.27	3.4	21.47	24.93	46.62	44.39	3.74	1.22	35.49	37.82	10.75	4.82	15.72	29.63	25.54	6.31	11.76	6.99	0.74	11.53	12.83	8.47	17.68	5.71	29.48	16.81	7.61	12.44	30.69	1.8	17.49	13.67	11.38	26.53	35.99	21.36	13.27	15.24
Chr16_17001769_17570960	XYLT1	12.88	25.43	6.84	14.47	8.88	9.01	6.21	7.57	11.24	33.61	8.71	6.22	18.37	23.33	50.37	46.45	9.53	2.22	38.36	35.41	11.56	5.44	15	30.99	31.96	5.93	12.38	5.62	1.41	12	13	9.7	19.37	5.83	30.52	16.41	9.16	10.76	34.53	2.31	17.77	13.34	15.24	31.6	37.04	31.82	12.6	17.29
Chr16_24510209_24927632	TNRC6A	13.39	23.46	9.38	14.25	8.72	7	4.14	6.78	13.92	35.79	8.76	5.57	20.04	23.35	50.1	42.6	8.59	2.47	40.8	33.37	12.11	5.37	14.3	33.12	33.8	6.44	15.42	6.55	1.31	13.28	14.44	9.86	19.02	6.17	29.8	16.62	11.37	12.44	38.76	2.14	18.05	14.28	15.95	33.67	37.1	29.8	14.05	17.83
Chr16_29711382_29915892	PRRT2	13.11	23.4	0.48	14.83	7.83	1.34	0.71	2.13	9.28	28.4	8.24	2.32	20.68	24.32	44.57	40.24	1.4	0.61	40.15	31.42	11.01	6.76	14.98	29.61	25.65	6.23	10.2	6.14	0.54	11.69	12.15	9.94	17.56	6.52	29.42	17.37	7.77	10.67	33.59	0.56	16.53	13.71	10.42	27.82	33.83	23.13	12.38	15.56
Chr16_53498153_53803938	RPGRIP1L	14.18	24.38	0.46	14.39	8.15	5.49	3.27	4.98	16.03	39.14	8.88	4.15	20.69	20.58	51.55	47.4	4.94	1.8	40.29	33.58	11.63	4.96	14.17	31.04	40.94	6.62	16.33	5.41	1.05	12.1	13.03	9.76	18.77	6.2	30.39	16.72	13.13	12.65	39.11	1.14	18.96	13.84	19.31	36.79	36.05	39.95	13.1	17.69
Chr16_57510652_57765580	ADGRG1	11.75	22.42	0.61	14.93	9.21	2.89	2.35	3.75	9.49	26.97	8.46	2.93	15.77	22.22	52.24	39.95	4.3	1.6	34.94	33.79	11.62	4.65	14.7	27.86	24.76	5.82	11.96	7.43	0.96	11.03	12.97	8.27	16.87	6.22	29.32	15.65	8.12	11.87	28.05	1.58	18.32	13.95	13.82	26.51	33.5	21.89	11.99	16.74
Chr16_580224_782870	STUB1	12.72	23.86	0.68	14.5	8.7	1.25	0.71	1.71	7.15	23.72	7.89	2.26	17.67	22.81	45.25	39.77	0.99	0.53	33.34	37.71	11.2	4.71	12.74	27.97	17.46	6.49	8.46	4.81	0.55	10.66	12.21	7.56	16.05	6.63	27.5	16.27	5.89	10.74	18.97	0.41	19.37	13.91	8.39	18.59	31.76	17.18	12.52	13.66
Chr16_66327295_66593529	BEAN1	13.26	24.07	14.78	15.84	9.26	4.07	2.02	4.27	10.58	29.69	8.26	3.78	20.06	21.97	48.57	44.35	3.88	1.1	34.52	35.92	12.41	5.92	15.16	32.34	28.82	5.93	15.21	6.03	0.73	11.73	12.48	9.59	17.73	6.23	28.92	16.62	8.65	12.61	34.05	1.65	19.15	13.01	14.38	28.3	36.56	27.15	12.08	16.52
Chr16_74612955_74874831	FA2H	12.42	23.58	0.51	15.58	8.01	4.34	1.96	3.73	12.56	33.16	8.75	3.93	19.25	22.13	48.76	43.78	3.93	1.52	35.67	34.48	11.43	5.55	14.5	32.29	30.65	6.27	13.94	7.03	0.76	12.34	13.08	10.28	17.67	6.01	29.97	16	10.63	12.65	40.73	1.13	18.29	13.48	14.8	30.86	37.38	28.65	14.41	16.23
Chr16_75436741_75656289	TMEM231	13.63	25.56	0.55	14.94	8.49	2.05	1.07	3.28	12.78	31.51	8.64	2.69	16.57	23.91	47.49	49.24	2.3	0.83	39.31	35.31	11.65	5.45	14.42	28.81	28.46	6.22	14.13	5.97	0.77	12.03	12.78	9.39	19.04	6.21	29.24	16.59	10.58	11.55	33.74	0.87	20.52	14.1	13.03	32.28	36.83	27.43	13.54	15.78
Chr16_77999400_79312667	WWOX	12.74	24.36	0.47	16.51	8.22	11.99	5.78	9.47	12.68	34.17	8.2	7.32	19.47	21.23	49.67	47.32	11.58	3.17	39.87	35.03	11.12	5.07	15.25	32.21	33.27	5.83	15.22	6.68	1.84	12.68	13.8	9.4	18.94	5.96	30.18	16.64	10.58	11.58	38.5	3.21	18.48	13.21	16.42	33.86	38.23	34.21	13.01	17.07
Chr16_87501835_87798156	JPH3	11.85	23.29	13.54	14.91	7.93	5.32	1.8	5	8.06	27.58	8.85	4.04	18.08	23.01	49.72	44.29	5.32	1.78	36.68	35.54	10.5	4.8	14.39	31.34	24.46	5.82	10.81	6.78	1.17	12.48	14.74	9.32	17.5	6.39	28.64	16.46	6.75	11.43	32.26	1.47	17.27	13.34	12.02	25.57	34	25.04	11.67	15.94
Chr16_89390719_89757738	CHMP1A;SPG7	12.88	27.08	0.5	15.45	9.8	3.45	1.81	3.31	9.56	29.93	8.38	3.65	18.93	22.18	45.59	39.39	4.7	1.32	33.99	35.72	11.75	5.32	14.48	30.81	28.92	6.31	12.18	6.62	0.87	12.34	14.28	9.38	17.95	6.24	29.49	16.24	7.94	12.53	31.43	1.19	17.41	14.69	11.12	25.96	32.44	20.96	12	15.94
Chr16_89821392_90038761	TUBB3	12.33	24.12	0.65	16.78	9.76	1.82	1.06	2.78	7.83	27.74	9.38	2.83	17.8	22.26	49.88	37.96	2.24	0.64	34.51	32.21	13.31	5.12	15.29	29.15	23.86	5.77	11.1	6.07	0.63	11.84	13.07	8.72	16.32	6.02	29.25	15.07	6.56	11.17	30.24	0.78	18.56	13.5	11.36	24.93	34.5	21.47	12.61	14.26
Chr17_15899784_16145015	TTC19	12.8	23.84	0.48	15.49	8.4	3.48	1.63	3.65	13.82	34.85	8.91	4.02	17.97	23.14	48.74	43.6	4.62	1.02	40.04	35.99	12.17	4.53	16.35	31.8	32.78	6.66	14.79	7.9	0	13.65	12.27	9.79	19.83	5.46	31.3	17.81	11.61	10.91	40.13	1.13	19.16	13.7	14.23	36.98	33.3	34.97	13.79	16.87
Chr17_1616523_1838599	WDR81	9.1	16.62	0.37	10.05	5.92	1.68	0.43	1.62	7.37	22.08	5.59	2.05	15.86	17.52	30.13	30.33	1.64	0.44	25.28	20.95	7.08	3.59	11.26	22.74	20.23	4.41	7.92	4.77	0	9.38	8.92	6.24	11.62	4.25	21.7	10.48	5.87	8.65	21.31	0.6	10.81	10.67	8.41	16.38	26.11	19.67	8.67	11.41
Chr17_28453383_28671794	PIGS	13.09	24.52	0.45	14.84	8.81	1.85	1.08	2.2	9.37	26.98	8.11	2.54	18.16	21.94	44.86	40.79	2.39	0.73	33.95	34.18	11.04	4.34	13.54	29.82	28.69	5.78	12.46	5.18	0	12.93	11.22	8.47	16.97	6.22	29.69	15.88	7.97	11.44	28.86	0.88	18.27	13.81	12.41	30.69	35.53	26.06	13.88	15.55
Chr17_34880512_35109743	LIG3	12.33	26.35	0.47	15.12	8.86	2.9	1.03	3.41	11.91	33.11	9.43	3.06	19.69	22.15	48.82	47.61	3.15	0.88	37.39	35.98	9.6	5.79	16.48	31.07	30.3	6.55	15.51	5.07	0	11.68	14.23	9.63	19.2	6.14	31.08	16.94	9.77	11.17	34.97	1.01	18.75	13.06	14.7	31.7	38.28	33.4	14.5	15.85
Chr17_408503_821717	VPS53	12.24	21.27	0.45	13.37	7.13	7.57	4.3	6.87	9.72	26.9	7.92	4.69	17.26	20	44.77	39.82	7.27	1.84	31.87	30.3	9.66	5.14	13.29	27.81	24.02	6.34	11.36	5.67	0	10.19	12.33	9.31	15.82	5.72	26.42	13.91	8.07	10.99	31.13	2.14	14.93	12.22	13.09	25.92	31.75	25.17	11.57	14.33
Chr17_42358844_42666277	ATP6V0A1;COASY	13	22.43	0.53	15.16	9.4	3.18	2.64	3.97	12.4	34.16	8.43	3.73	20.71	23.56	52.14	42.6	3.67	1.32	39	35.33	11.6	5.8	15.36	32.28	29.82	6.7	12.61	7.17	0	14.33	12.45	9.6	18.06	6.34	30.2	16.65	10.38	12.58	34.64	1.09	17.74	14.7	13.94	29.8	34.9	30.17	12.27	16.89
Chr17_44105033_44321626	UBTF	12.73	23.91	0.51	13.7	9.39	1.97	1.1	2.93	9.07	26.86	9.27	2.61	19.39	23.25	43.38	46.38	1.48	0.68	35.98	35.53	9.44	4.98	13.96	29.45	26.71	5.83	11.26	5.81	0	12.56	13.43	8.53	17.37	6.12	30.21	16.09	7.3	13.37	30.67	0.68	17.08	14.42	12.49	26.23	35.13	20.36	13.83	14.68
Chr17_44803159_45016937	GFAP	12.85	22.81	0.59	15.81	9.22	2.21	1.14	2.14	10.13	27.73	9.48	2.72	17.56	22.58	43.88	42.22	1.66	1.1	37.32	32.98	10.71	5.05	14.27	31.35	25.52	5.94	10.69	5.69	0	13.35	12.85	9.08	18.66	6.74	27.97	16.58	8.42	11.88	31.85	0.88	18.22	14.16	12.51	29.41	33.06	23.87	12.55	15.31
Chr17_46823075_47075524	GOSR2	9.99	20.32	0.49	13.2	7.26	3.14	1.78	3.72	9.09	24.64	7.25	3.79	15.75	16.9	41.4	36.69	3.15	0.84	29.3	28.15	11.55	4.63	11.66	25.67	24.28	4.84	8.79	5.07	0	10.21	10.75	7.62	14.13	5.31	23.2	14.22	7.68	10.16	32.45	1.41	17.42	9.98	10.32	24.93	31.74	21.45	11.87	14.18
Chr17_4897950_5128401	KIF1C	13.23	23.85	0.59	15.62	8.52	2.77	1.13	3.06	9.59	29.46	8.95	3.36	18.75	22.93	47.31	44.57	2.76	0.81	35.14	33.34	11.1	5.4	13.5	30.67	27.79	5.58	11.85	5.85	0	12.28	13.65	8.84	17.84	7.12	28.5	16.71	8.09	14.13	29.5	0.75	18.47	15.34	11.85	29.2	33.82	21.4	11.37	16.5
Chr17_50460715_50727474	CACNA1G	13.03	23.92	0.56	15.9	8.49	3.86	1.9	3.71	8.91	24.94	8.32	3.52	20.54	23.63	44.27	44.04	3.58	1.08	34.69	35.7	10.45	5.06	13.02	28.78	22	5.75	12.4	5.75	0	13.18	14.12	8.55	18.33	6.55	28.45	16.12	7.43	11.08	29.18	1.39	18	14.37	12.53	26.43	39.98	20.1	13.74	15.6
Chr17_51530312_52260022	CA10	12.47	23.02	6.07	15.5	8.77	10.04	5.75	8.39	13.95	33.7	7.63	6.66	18.64	20.47	47.45	46.47	11.02	2.47	39.7	35.72	11.04	4.97	14.76	30.81	35.33	5.69	15.01	6.06	0	12.04	13.16	9.01	19.3	6.24	30.64	16.63	11.67	12.09	41.06	3.09	17.52	13.93	18.06	38.73	36.88	38.32	13.8	16.27
Chr17_58105441_58319605	MKS1	13.27	22.79	0.48	17.91	9.13	1.81	0.99	2.1	11.99	32.44	8.37	2.64	18.13	21.68	43.35	42.25	2.09	0.71	37.78	33.9	8.5	5.59	18.02	31.69	25.44	5.57	13.11	5.85	0	11.12	13.42	9.15	18.67	6.1	29.8	15.31	10.15	11.12	35.44	0.87	17.63	12.76	15.78	31	38.24	32.65	13.92	16.4
Chr17_59574636_59807626	PTRH2	12.65	24.77	0.45	15.17	8.59	2.22	1.44	3.1	17.45	40.77	9.14	3.04	19.44	21.01	50.28	44.11	3	0.94	38.03	33.12	11.6	5.21	13.75	32.6	34.05	7.2	15.38	5.89	0	12.22	13.43	10.34	19.52	5.62	29.93	15.96	13.96	11.19	38.47	0.88	17.37	13.62	18.92	37.73	34.25	32.91	14.12	17.45
Chr17_75415944_75624735	TSEN54	13.41	24.34	0.52	12.81	7.72	1.59	0.76	2.18	8.46	23.66	9.22	2.52	16.91	21.84	48.4	40.55	1.46	0.67	35.26	31.8	11.32	5.11	13.44	28.17	26.68	6.55	10.93	5.73	0	12.43	13.06	8.43	16.7	6.81	27.75	15.95	7.08	12.02	26.73	0.62	18.38	14.44	9.32	23.92	35.31	19.66	12.79	14.84
Chr18_12228944_12477227	AFG3L2	13	22.29	0.5	14.19	8.03	3.83	2.1	3.75	11.89	32.43	8.25	3.71	17	21.88	40.27	44.67	3.54	1.27	35.74	37.34	9.5	4.98	13.73	31.03	28.52	5.53	13.67	4.7	0.89	13.64	15.09	10.06	18.08	6.38	26.74	17.02	9.86	12.22	34.09	1.11	17.56	12.69	14.9	31.25	35.82	28.79	13.42	16.87
Chr18_23406184_23686506	NPC1	13.33	24.43	0.46	14.77	8.67	4.58	2.3	4.46	13.83	34.82	8	4.07	19.11	22.39	47.94	45.87	5.36	1.84	41.07	34.65	11.14	5.45	14.58	31.81	30.89	5.8	13.81	6.27	0.99	12.87	14.06	9.85	19.31	6.33	30.42	17.03	11.47	13.03	36.25	1.49	18.28	13.65	16.34	31.24	33.53	31.41	14.1	15.98
Chr18_52240197_53635903	DCC	12.87	23.35	0.45	15.96	8.36	11.52	6.36	9.88	15.54	39.12	7.58	7.27	20.47	20.58	51.98	47.02	12.61	3.14	37.46	33.5	10.99	4.59	15.32	30.36	39.61	5.93	16.59	6.81	1.62	12.28	13.78	9.22	19.78	5.67	30.3	16.03	12.93	11.78	44.77	3.23	17.92	14.61	20.79	39.8	38.29	43.4	13.17	15.89
Chr18_55122185_55764787	TCF4	12.95	24.15	6.04	15.31	8.46	10.45	5.22	8.77	16.15	40.85	7.93	6.19	21.72	20.61	46.66	44.48	10.14	3.1	38.88	34.26	10.91	4.78	14.58	31.91	35.41	5.9	14.77	6.72	1.51	13.34	13.99	9.53	19.56	5.8	29.78	16.05	13.46	11.32	41.6	2.76	18.34	14.52	19.81	39.02	36.71	40.54	13.51	17.14
Chr18_6841742_7217797	LAMA1	13.57	24.79	0.49	15.48	9.13	6.82	2.95	6.16	14	37.99	8.47	5.84	19.46	21.5	52.75	45	7.59	1.73	41.72	35.63	11.86	5.09	16.03	31.92	34.21	5.89	12.99	7.12	1.24	12.45	14.48	9.52	18.16	6.27	30.02	17.06	11.77	12.19	37.02	2.08	18.05	13.34	17.14	32.16	36.84	36.98	12.4	16.67
Chr18_8605556_8932778	MTCL1	12.69	22.17	0.51	13.94	9.16	5.83	2.95	5.91	11.44	30.69	8.53	4.31	18.99	21.82	48.51	44.5	7.27	1.55	38.98	33.15	11.9	5.43	16.34	32.21	30.57	6.01	12.09	6.01	1.53	11.01	14.7	9.3	18.61	6.48	29.43	16.46	9.26	12.45	40.5	1.41	18.21	14.41	17.65	31.11	37.91	31.66	12.98	16.59
Chr19_10033342_10331286	DNMT1	12.66	23.01	0.5	15.56	9	5.57	2.66	5.7	9.23	30.27	8.28	4.16	21.8	23.97	48.3	45.24	5.39	0	37.06	34.8	11.33	5.58	13.74	29.63	26.8	6.14	11.07	6.02	0	13.29	13.28	8.56	17.75	6.36	31.82	16.83	7.87	11.62	30.48	1.33	17.74	13.31	10.47	27.17	37.53	23.82	12.21	15.8
Chr19_13106442_13733025	CACNA1A	13.71	26.28	6.95	15.36	8.33	9.97	5.44	8.51	10.58	30.87	9.03	6.92	19.25	23.57	48.82	44.06	9.37	0	39.11	33.94	12.22	5.2	15.6	31.77	28.41	6.1	12.01	6.55	0	13.79	12.39	9.29	17.82	6.22	29.56	16.42	8.86	12.44	35.27	2.71	18.56	13.18	15.24	30.84	36.49	27.45	13.07	15.29
Chr19_14377760_14596149	GIPC1	12.29	27.76	12.9	13.87	9.11	1.78	1.06	2.54	9.41	29.98	8.7	2.95	19.47	26.52	49.14	46.96	2.52	0	34.08	36.73	11.94	5.24	15	29.73	23.58	6.77	9.94	8.23	0	13.45	11.33	8.7	17.24	6.75	29.16	15.81	7.63	11.03	31.99	0.85	18.04	14.57	11.19	26.48	34.82	23.77	12.98	15.49
Chr19_19092229_19301869	RFXANK	12.27	25.11	0.52	15.45	7.91	1.7	0.68	1.95	8.29	25.04	8.52	2.64	18.55	23.97	48.95	41.63	1.4	0	35.52	34.66	12.2	5.59	12.64	30.17	19.51	6.06	9.44	3.96	0	12.15	13.2	9.22	17.26	6.38	28.8	16.48	6.98	13.35	31.71	0.68	17.74	13.35	10.11	24.95	29.24	21.33	13.04	15.39
Chr19_35192125_35413807	MAG	13.47	23.35	0.49	17.58	7.62	2.55	1.53	3.25	10.32	28.43	8.36	2.84	17.72	22.23	45	37.82	2.38	0	38.89	33.73	12.69	5.26	13.84	27.83	25.66	6.01	10.6	4.15	0	12.58	13.09	9.1	18.02	6.49	27.79	16.14	8.69	11.56	28.63	0.81	19.55	12.55	12.44	29.31	36.78	23.13	11.29	16.72
Chr19_3779864_4085463	EEF2;ATCAY	12.31	25.77	0.6	15.52	7.89	3.02	1.48	3.71	9.43	28.7	8.29	3.6	18.49	24.8	44.07	41.06	3.39	0	36.59	36.19	11.01	5.33	13.21	30.36	20.56	6.93	11.07	6.34	0	12.64	13.53	8.68	16.34	6.68	29.27	15.28	7.86	12.05	29.37	1.09	18.55	13.81	9.77	24.26	32.63	19.31	12.68	16.11
Chr19_40248456_40480439	PLD3	14.82	25.19	0.46	14.93	8.57	3.27	1.49	3.05	8.92	31.13	8.54	2.82	20.06	24.9	48.44	42.65	3.04	0	35.4	31.21	9.89	4.96	14.48	29.68	26.81	6.21	13.17	7.74	0	13.67	13.97	8.6	17.09	6.81	27.63	16.7	7.4	10.67	31.02	0.88	17.61	13.74	10.8	27.38	30.92	27.33	13.21	16.29
Chr19_41286371_41497362	EXOSC5	10.53	23.78	0.45	13.68	7.4	1.87	0.62	2.56	9.91	27.85	7.84	2.29	18.54	21.89	44.81	43	1.77	0	33.06	32.67	12.37	5.43	13.98	30.03	25.14	5.4	11.32	5.63	0	10.97	12.14	8.67	15.92	5.51	27.32	14.76	8.31	11.47	30.88	0.79	15.67	15.62	12.67	25.93	31.07	25.11	11.89	14.66
Chr19_41866582_42097497	ATP1A3	12.63	22.68	0.61	16.33	8.21	2.96	1.31	3.19	7.32	23.98	8.52	3.07	18.4	22.67	43.25	43.86	2.66	0	35.01	35.46	11.82	4.12	14.71	29.62	26.26	6.31	12.29	5.27	0	12.53	13.51	7.65	16.43	6.87	29.15	15.6	5.97	12.63	30.48	0.57	18.22	13.19	10.51	24.53	32.31	23.32	13.16	14.51
Chr19_43443311_43680473	XRCC1	13.63	25.92	0.53	14.5	8.32	3.22	1.95	3.26	9.28	30.32	8.68	3.36	17.54	21.67	46.58	42.95	3.22	0	36.19	35.42	11.81	4.66	18.08	30.93	28.29	6.5	11.93	5.74	0	13.03	12.05	9.56	17.74	5.89	28.97	16.51	7.74	12.93	27.47	1.19	18.99	13.42	16.01	27.07	35.47	25.8	12.89	15.7
Chr19_45427767_46074044	NOVA2;DMPK;OPA3	14	23.8	7.06	14.81	8.83	3.25	1.64	3.65	10.49	31.04	8.45	3.2	19.68	23.29	51.11	46.34	2.97	0	36.35	34.28	11.24	5.17	14.12	31.03	28.56	6.45	12.73	6.83	0	12.75	12.88	9.13	18.01	6.47	29.19	16.65	8.78	11.74	30.52	1.12	17.79	14.31	12.93	28.99	38.02	25.92	14	15.6
Chr19_46646046_46876988	FKRP	14.01	24.1	0.59	14.21	8.37	2.46	1.34	3.21	10.37	28.92	9.88	3.12	19.18	23.92	54.43	48.19	2.61	0	36.35	35.34	11.78	5.94	14	31.68	25.73	6.14	12.86	4.75	0	12.91	14.35	8.96	16.75	6.2	27.81	16.61	8.7	10.86	29.43	1.34	17.77	14.39	11.49	26	38.87	18.53	13.15	15.6
Chr19_49759882_49978351	PNKP	12.33	24.45	0.49	14.7	7.94	1.93	1.2	2.33	9	27.74	9.72	2.42	18.48	23.33	41.4	47.7	2.16	0	31.32	36.16	11	4.98	15.7	28.66	22.77	5.9	12.75	5.17	0	14.07	14.18	8.79	17.36	6.36	30.72	15.78	7.37	11.64	30.01	0.95	18.23	16.29	10.56	28.27	35.94	19.21	12	16.7
Chr19_50211937_50433515	KCNC3	12.08	24.79	0.53	17.43	8.27	3.09	1.16	2.74	9.12	27.26	9.57	2.99	17.2	23.24	47.72	42.39	1.85	0	38.23	33.83	11.74	5.78	15.25	27.98	25.17	6.36	10.03	5.66	0	12.41	14.18	9.04	16.96	6.35	32	15.88	7.53	11.37	31.07	0.72	17.09	14.2	12.81	27.97	35.16	24.44	13.17	14.86
Chr19_53779190_54007652	PRKCG	12.01	26.91	0.6	13.81	8.9	2.61	0.94	3.23	11.18	30.78	8.07	2.97	21.55	24.14	40.2	45.29	2.34	0	37.28	34.27	10.53	5.39	14.83	30.81	27.04	5.81	10.93	4.07	0	12.74	13.62	9.76	17.58	6.52	28.85	16.26	9.09	11.18	30.41	0.91	17.52	13.4	12.67	27.6	38.83	27.41	13.27	15.55
Chr19_54089938_54294536	TSEN34	3.18	7.76	0.13	4.97	2.38	0.27	0.22	0.47	0.57	8.78	2.29	0.55	7.91	6.88	10.48	12.63	0.57	0	7.56	8.83	2.88	1.45	3.07	8.64	6.83	0.74	1.88	1.16	0	1.69	3.57	3.76	5.53	3.02	6.05	5.52	0.38	4.34	11.38	0.13	5.7	4.58	3.08	7.35	8.73	2.22	2.32	4.82
Chr19_6261531_6602848	CLPP;TUBB4A	13.69	21.99	0.6	16.54	9.39	1.61	0.91	2.51	10.49	31.31	9.44	2.54	18.86	21.8	41.86	41.27	1.77	0	36.67	39.3	11.58	5.31	14.57	30.16	27.04	6.24	11.23	6.21	0	12.85	11.93	8.86	17.52	5.86	29.14	16.13	8.57	12.21	30.44	0.67	17.75	13.34	11.62	27.18	33.17	20.54	14.09	15.27
Chr19_7434004_7661764	PNPLA6	12.07	22.53	0.64	14.7	9.83	2.92	1.56	3.44	9.24	26.88	8.38	2.68	19.51	23.88	43.77	43.42	3.02	0	34.23	33.05	11.4	4.66	14.4	28.04	25.24	5.99	13.01	5.73	0	11.17	11.73	8.48	16.69	6.92	28.28	16.04	8.01	10.52	29.74	0.74	16.43	13.94	11.24	25.07	32.89	21.95	11.73	14.49
Chr2_110022311_110305066	NPHP1	12.5	25.32	0.46	15.26	8.36	4.82	2.48	4.88	11.15	28.18	7.59	3.59	18.66	20.1	37.33	35.81	4.06	1.35	32.64	31.66	7.7	4.86	13.75	26.97	26.36	6.4	11.54	4.31	1.04	9.2	11.44	7.75	16.61	5.45	26.32	13.63	9.09	11.27	32.73	1.47	15.39	12.77	16.02	26.76	32.77	27.69	12.25	14.47
Chr2_130051392_130282750	SMPD4	12.54	22.75	0.5	14.71	8.44	2.72	1.37	3.24	16.25	27.55	6.98	3.25	15.88	21.94	39.2	42.03	3.02	0.78	34.33	30.49	8.22	4.69	13.54	28.99	23.53	5.69	13.48	4.93	0.82	10.9	11.13	8.19	17.13	5.79	28.49	14.38	13.43	11.98	28.11	0.97	15.96	12.83	14.83	26.71	31.13	24.13	12.03	14.46
Chr2_165094993_165492310	SCN2A	12.99	20.73	0.47	15.96	7.97	7.58	3.88	6.37	17.54	42.12	7.29	5.03	20.22	19.46	45.33	46.2	7.21	2.03	39.34	31.92	10.54	4.76	14.94	31.44	40.59	6.64	16.14	6.71	1.37	13.26	12.59	9.96	19.47	5.7	32.56	17.08	14.6	10.88	39.87	2.5	16.72	15.77	24.95	40.27	36.42	42.74	12.12	16.29
Chr2_165884641_166249214	SCN1A	14.68	22.41	0.46	14.04	8.36	6.94	3.81	6.25	18.77	42.77	8.67	5.33	22.9	20.58	48.87	44.79	7.33	1.87	38.39	34.41	11.02	4.92	13.74	32.62	39.64	6.05	17.91	8.43	1.22	12.12	12.96	9.48	19.32	5.93	30.27	16.14	15.56	11.29	42.47	1.69	18.44	15.12	20.57	42.07	36.59	42.56	12.59	17.15
Chr2_190780821_191065552	GLS	13.05	23.08	12.12	15.05	8.32	5.68	2.52	4.56	17.25	40.6	8.47	3.79	20.2	21.46	47.31	46.92	5.27	1.14	39.46	31.91	12.19	4.66	14.45	32.51	39.63	7	14.71	6.65	1.23	12.93	12.78	9.8	19.62	5.81	29.92	17.12	14.15	11.79	40.09	1.18	18.81	14.69	18.44	36.61	33.62	36.63	13.05	15.83
Chr2_197605369_197808395	MARS2	11.95	17.89	0.68	14.01	8.86	1.31	0.67	2.09	14.66	35.25	8.39	2.39	18.77	21.09	47.02	44.45	1.91	0.64	39.27	29.89	10.79	4.88	15.43	30.57	39.3	5.94	15.87	6.09	0.59	10.96	14.21	8.75	19.23	5.41	30.04	15.35	12.26	11.19	42.17	0.55	16.63	14.81	15.77	33.48	36.21	38.44	10.95	16.28
Chr2_201520184_201743570	TMEM237	13.18	26.03	0.53	12.71	8.6	1.94	0.97	2.91	16.21	37.89	7.67	3.15	20.95	18.64	50.16	46.74	3.23	1.04	40.55	34.71	10.7	5.17	14.12	31.41	33.02	6.13	14.09	5.85	0.68	12.52	14.36	9.69	19.47	5.98	28.56	14.86	13.41	10.98	38.04	0.92	18.29	14.5	18.5	37.34	35.47	40.96	14.04	16.09
Chr2_218169651_218446793	PNKD	14.09	23.38	0.51	14.37	9.07	4.23	2.74	4.61	10.09	30.62	9.04	3.93	17.03	22.79	47.8	43.79	5.03	1.31	37.56	35.35	11.06	5.14	15.07	31.08	28.84	6.07	10.66	6.85	0.82	12.66	15.28	9.41	17.8	6.35	28.61	17.56	7.97	11.19	31.87	1.06	18.84	14.48	11.49	27.96	36.02	28.06	12.39	17.01
Chr2_218681749_218915293	CYP27A1	10.91	22.61	0.51	14.95	9.28	2.64	1.34	3.39	11.36	29.95	8.54	2.82	18.07	22.34	48.73	42.81	2.82	0.86	38.84	35.67	11.99	5.57	13.05	30.98	26.28	6.33	13.18	7.51	0.84	12.62	13.26	9.33	19.29	6.17	31.03	15.96	9.8	12.22	30.74	0.83	17.45	13.28	13.7	29.32	35.01	27.1	12.09	15.77
Chr2_238038668_238252947	KLHL30	1.45	0.76	0.56	1.58	1.18	1.17	0.42	1.7	2.71	25.75	2.3	2.15	0.74	2.24	47.59	42.21	1.2	0.66	37.61	31.6	1.07	0.93	0.63	30.16	27.33	1.25	1.17	0.48	0.5	2.15	1.43	3.09	6.42	1.7	30.21	16.45	2.17	1.86	30.53	0.43	2.4	2	0.91	4.27	35.65	3.27	2.37	2.64
Chr2_240613761_240924293	KIF1A	11.18	22.63	0.61	15.79	8.44	4.88	2.96	4.94	8.5	23.03	8.12	4.62	17.34	24.31	46.33	38.64	5.09	1.55	34.02	33.93	10.77	4.51	13.19	27.1	27.98	6.06	11.46	6.88	1.26	12.25	13.74	8.33	16.95	6.51	30.12	15.9	7.33	12.37	27.89	1.64	17.05	12.82	10.94	24.63	34.45	21.34	11.87	16.03
Chr2_26747747_27050351	DPYSL5	13.8	23.79	0.49	16.36	7.5	5.49	2.7	5.85	10.91	31.45	7.85	4.12	18.73	21.81	45.56	45.11	5.53	1.53	36.49	34.8	11.68	5.02	15.63	32.03	29.65	6.15	11.61	6.67	1.16	12	13.2	9.66	19.25	5.87	29.53	16.97	9	11.03	33.36	1.44	18.51	15.06	13.89	31.42	40.58	29.85	13.43	16.44
Chr2_27117369_27470338	EIF2B4;CAD	12.28	25.42	0.49	14.8	7.96	2.06	0.8	2.56	10.22	29.45	9.24	2.73	19.6	22.92	46.27	44.74	2.31	0.9	37.92	31.96	10.86	5.01	15.52	30.43	28.78	6.05	13.24	5.56	0.59	13.16	13.14	8.94	18.07	6.42	30.07	16.72	8.46	11.63	33.45	0.72	16.94	14.23	11.8	29.23	37.68	25.1	12.96	15.51
Chr2_36868383_37184372	HEATR5B	13.07	20.16	0.54	13.45	9.33	5.9	2.44	5.93	17.03	40.83	7.97	4.66	20.33	24.36	50.46	44.97	5.78	1.59	40.06	31.92	9.93	5.43	14.88	34.07	31.7	5.96	16.16	6.67	1.03	12.07	14.27	10.09	18.16	5.99	30.85	16.64	14.17	11.25	38.66	1.65	17.89	13.62	16.39	40.13	40.4	34.92	13.3	16.16
Chr2_55534061_55793863	PNPT1	1.62	0.8	0.5	1.44	1.51	1.18	0.53	1.94	5.24	37.92	2.22	2.31	0.88	2.21	47.53	43.61	1.35	0.61	41.01	30.92	1.37	1.14	0.68	32.78	30.81	1.51	1.78	0.92	0.6	2.37	1.68	4.01	20.02	1.64	30.17	17.58	4.18	2.04	40.13	0.52	2.96	2.8	1.41	36.26	35.28	39.13	2.95	3.58
Chr2_72787382_72992158	SPR	12.7	22.3	0.46	14.52	7.53	1.58	0.51	1.97	12.32	30.02	8.63	2.45	18.5	23.18	46.7	45.35	1.74	0.67	36.58	35.14	10.4	4.65	14.95	29.81	28.71	5.95	13.92	4.68	0.8	11.1	13.01	9.17	19.32	6.09	28.63	16.52	10.2	11.9	33.83	0.58	18.05	14.3	16.84	33.4	42.33	28.98	13.93	16.28
Chr2_96084859_96308825	STARD7	13.07	26.81	16.82	14.53	8.44	2.75	1.1	3.25	9.75	27.99	8.76	3.08	17.83	22.94	49	45.18	2.31	0.87	36.16	35.27	10.73	4.78	15.66	28.27	28.81	5.23	11.52	4.67	0.58	12.98	12.38	9.37	17.2	6.38	27.98	16.04	8.26	12.07	29.63	1.04	17.13	14.17	12.96	28.82	35.62	25.73	12.43	15.61
Chr2_99445419_100292428	AFF3	13.33	22.88	4.98	15.21	9.03	10.34	6.3	9.64	13.83	35.09	8.39	6.77	19.73	22.36	51.52	47.04	10.58	3.38	39.49	36.74	11.51	4.96	14.21	31.63	33.03	6.33	15.09	6.85	1.65	12.4	13.69	9.51	19.05	5.97	30.06	16.46	11.52	12.18	39.14	3.1	18.43	14.34	17.25	35.09	39.34	36.81	12.7	16.38
Chr20_10072395_10534222	MKKS;SNAP25	13.36	23.13	0.49	14.33	8.3	6.31	3.14	5.16	14.46	36.52	8.15	4.4	18.75	21.8	49.95	45.29	6.11	0	38.95	34.2	10.42	4.73	15.51	31.53	36.09	6.23	15.97	6.15	0	13.21	13.04	9.47	19.66	6.07	29.99	16.66	12.05	11.24	45.12	0	17.56	14.81	16.89	36.54	36.77	38.16	12.88	16.47
Chr20_1878757_2094285	PDYN	12.89	23.23	0.46	15.7	8.55	1.53	0.84	2.48	10.23	27.9	6.94	2.95	20.11	21.51	48.86	39.32	1.71	0	39.31	31.85	10.28	4.82	13.16	30.06	26.88	5.24	13.16	6.39	0	12.96	14.23	9.78	19.5	6.06	29	16.27	8.86	12.06	38.54	0	19.58	12.41	14.59	29.38	37.08	30.33	11.63	16.11
Chr20_2280901_2532753	TGM6	12.51	22.38	0.52	14.86	8.23	3.8	1.87	3.6	12.11	34.54	7.82	3.7	19.5	22.64	47.58	43.44	3.99	0	36.82	34.51	12.98	4.35	14.95	31.71	31.56	5.81	13.79	4.24	0	12.82	13.39	9.81	20.12	6.11	30.47	16.05	9.7	11.76	43.85	0	17.32	12.95	16	31.05	36.92	31.18	12.66	17.05
Chr20_25194742_25490835	ABHD12	13.06	23.85	0.61	14.72	8.11	4.93	2.61	5.34	11.52	30.71	7.86	4.64	19.23	21.75	50.65	40.11	5.71	0	36.46	33.95	11.37	4.88	12.61	32.47	30.72	6.05	12.38	4.72	0	13.33	13.9	9.49	18.42	6.31	30.68	16.94	9.54	11.82	29.12	0	17.57	14.05	12.38	29.66	37.09	26.09	12.76	16.55
Chr20_2552593_2758393	NOP56	13.69	26.66	14.91	16.5	8.68	1.99	0.69	2.07	11.81	32.37	8.01	2.53	19.29	23.24	48.04	42.64	1.77	0	35.97	31.4	10.58	5.41	13.11	29.82	28.89	5.71	12.45	6.47	0	14.13	14.04	9.26	17.76	6.14	32.1	16.95	9.92	10.74	38.9	0	16.53	11.91	13.81	31.7	40.44	31.95	13.25	16.19
Chr20_34828432_35056027	GSS	12.29	24.32	0.49	14.95	7.76	1.96	1.07	2.97	10.47	29.06	7.65	2.88	15.17	22.38	51.66	41.96	2.04	0	38.04	33.91	9.76	4.93	16.39	28.98	24.57	6.82	11.55	5.1	0	11.29	13.52	8.69	18.77	6.05	29.39	16.55	8.86	12.18	32.35	0	18.27	13.05	14.38	30.59	32.04	32.12	12.58	17.16
Chr20_4586350_4801590	PRNP	12.75	27.38	0.45	14.81	8.16	2.42	0.83	2.4	12.16	30.47	8.22	2.65	18.97	22.09	45.53	40.63	2.3	0	42.03	33.7	11.76	4.65	16.13	31.52	31.63	6.22	12.43	6.44	0	12.34	11.56	9.72	19.62	6.13	30.25	15.95	10.04	12.4	39.53	0	18.99	12.83	15.23	32.11	37.85	30.31	12.14	16.71
Chr20_46179815_46379902	CDH22	13.37	21.99	18.82	15	9.6	1.04	0.41	1.78	8.84	23.89	9.04	2.21	16.88	24.25	43.8	39.47	0.99	0	34.73	34.03	10.89	4.66	14.02	29.94	24.87	5.69	10.92	5.38	0	12.59	12.12	8.57	18.01	6.22	29.01	14.76	7.73	11.73	29.22	0	18.65	12.72	10.49	28.34	35.63	24.83	13.42	16.17
Chr20_63300208_63572677	KCNQ2	10.61	20.18	0.66	13.16	6.51	3.58	1.32	2.37	6.12	18.72	6.9	2.93	15.43	20.88	40.35	37.19	3.37	0	29.01	31.41	9.02	4.26	12.23	23.84	20.23	4.98	8.23	4.24	0	11.19	11.42	7.26	13.32	5.93	24.91	15.08	5.07	10.17	18.92	0	14.69	11.74	8.65	20.82	32.4	13.83	12.07	13.59
Chr20_63795126_64036031	DNAJC5	13.29	24.14	0.56	14.82	7.95	3.27	1.74	3.52	9.41	27.66	8.53	3.31	19.16	24.8	46.19	39.9	3.33	0	36.03	36.31	10.91	5.21	14.64	30.57	23.82	5.86	10.51	6.93	0	12.4	13.45	9.25	17.22	6.31	27.41	15.85	7.67	11.93	32.31	0	18.29	14.47	9.27	25.24	34.32	20.16	11.91	14.81
Chr21_43672511_43877330	CSTB	11.82	26.15	17.77	13.71	8.5	1.44	0	2.03	9.46	29.83	10.32	0	18.89	22.83	46.74	41.06	1.85	0	35.8	37	10.8	5.95	15.07	31.39	20.3	5.98	11.13	6.82	0.73	12.06	13.56	9.4	18.03	6.28	28.87	16.16	8.12	10.5	23.87	0	18.22	13.26	12.91	26.66	36.31	24.43	13.29	14.44
Chr22_18010100_18246683	TUBA8	12.32	22.56	0.47	15.24	7.73	2.81	1.93	3.22	9.02	23.16	7.78	3.04	19.76	22.37	37.75	38.11	2.82	0.94	29.58	27.43	10.03	5.65	14.63	24.99	23.43	5.71	9.17	6.2	1.08	11.31	10.25	8.53	15.83	5.21	22.95	14.11	7.55	11.08	29.94	0.92	16.4	12.79	11.63	24.49	24	27.65	10.37	14.24
Chr22_20607691_20959417	PI4KA	13.84	23.14	0.52	14.48	9.44	7	4.21	6.97	11.52	28.99	8.67	4.43	18.84	22.06	47.77	42.71	6.28	2.45	38.19	36.09	10.39	5.03	16.86	30.83	28.31	6.53	13.41	6.63	1.23	12.39	14.12	8.66	18.06	6.22	30.51	16.43	9.72	11.21	32.55	1.85	16.32	14.28	12	30.16	33.96	24.9	13.69	15.64
Chr22_30825130_31068774	MORC2	14.57	24.55	0.46	15.47	9.29	2.86	1.87	3.51	10.95	29.48	8.19	3.03	18.07	20.51	44.92	40.06	3.39	1.31	38.51	34.19	8.7	5.31	15.12	32.64	28.36	6.43	14.07	5.27	0.78	13.05	13.27	9.38	17.74	5.94	29	15.9	9.11	12.25	37.17	1.04	16.59	14.15	15.7	27.81	34.35	28.48	12.93	15.93
Chr22_33062226_34022841	LARGE1	13.03	25.59	0.5	16.63	8.53	11.38	5.88	9.82	11.88	31.05	8.17	7.1	18.55	22.51	50.32	45.92	11.01	2.81	39.07	34.25	10.58	4.87	15.39	31.6	32.84	5.87	13.48	5.78	1.64	12.45	14.01	9.21	18.35	6.31	29.54	15.88	9.71	11.58	39.1	2.9	17.76	12.97	17.12	33.24	37.89	35.09	13.07	16.03
Chr22_38011495_38314778	PLA2G6	13.19	23.59	0.52	16.09	9.22	5.42	3.11	5.58	8.7	26.26	8.15	3.95	19.88	24.2	46.38	40.48	5.56	1.59	36.16	32.83	11.03	5.19	15.4	27.87	23.96	6.66	12.22	5.5	1.21	13.71	13.61	9.04	17.51	6.73	29	16.85	7.23	10.56	26.27	2.01	17.29	12.9	12.74	25.29	32.34	19.35	13.52	16.69
Chr22_38556636_38773854	CBY1	12.26	26.96	0.63	13.72	8.07	1.85	1.33	2.72	11	30.8	9.55	2.82	17.55	22.54	47.37	41.87	2.24	1.08	38.59	33.44	9.55	5.43	14.44	31.61	27.71	5.73	11.72	5.93	0.62	13.35	13.68	9.48	17.86	5.85	28.76	16.14	9.1	11.63	28.97	0.88	19.48	14.11	13.12	30.75	38.11	25.49	12.94	15.44
Chr22_41347830_41629273	ACO2	14.16	25.55	0.46	14.76	9.48	4.89	2.87	4.46	10.34	31.22	8.74	4.14	18.7	23.4	47.8	45.81	4.98	1.16	37.81	35.67	11.39	5.01	15.86	30.81	27.63	5.9	12.9	8.06	0.91	12.68	12.47	9.03	17.26	6.12	28.92	17.33	8.44	11.7	33.48	1.25	17.67	14.75	12.92	27.32	36.53	24.17	13.97	16.93
Chr22_45571798_45945307	ATXN10	12.4	22.65	10.78	15.13	7.7	6.65	4.21	6.33	11.75	31.18	8.33	5.02	19.72	23.22	46.21	43.77	7.18	2.07	37.8	36.4	11.49	4.7	14.83	30.09	32.85	6	13.6	5.44	1.42	12.18	13.56	8.89	18.34	6.2	31.17	16.42	9.92	12.45	35.24	2.03	18.72	12.91	14.95	31.56	38.05	31.42	12.65	16.05
Chr22_50522754_50728173	ARSA	13.07	24.45	0.55	14.7	8.63	1.51	0.75	1.94	10.24	28.03	9.22	2.33	18.05	24.62	41.07	42.05	2.03	0.62	35.33	32.81	10.62	4.46	13.49	28.35	22.68	6.58	11.18	6.85	0.52	11.35	12.54	8.42	16.72	6.11	27.74	17.14	8.88	12.29	30.27	0.5	17.37	13.58	11.45	23.96	35.23	24.25	13.18	14.5
Chr3_100160992_100425251	TBC1D23	13.15	24.81	0.48	14.75	9.1	4.32	2.26	4.22	14.83	37.27	7.85	3.35	21.08	20.57	49.56	44.79	4.1	1.54	37.57	35.5	10.92	4.55	13.71	30.99	33.59	7.03	15.38	4.94	0.99	12.25	12.67	9.96	19.55	5.9	30.17	15.98	12.31	11.9	41.03	1.48	18.75	14.55	15.95	36.47	34.46	37.18	13.35	15.61
Chr3_10892186_11139247	SLC6A1	13.05	25.21	15.85	15.67	8.85	4.19	1.58	3.34	9.57	26.97	8.52	3.28	18.95	23.1	52.53	41.87	3.45	1.2	37.44	34.9	11.98	4.84	16.33	30	28.66	5.9	12.63	6.08	0.85	12.64	12.07	9.82	17.3	5.96	28.1	16.91	7.88	11.47	30.19	1.32	18.04	12.02	15.08	28.58	34.17	25.42	11.13	16.3
Chr3_11172309_11657665	ATG7	12.41	22.24	0.51	15.61	8.54	8.54	4.75	8.21	12.66	34.99	8.08	5.86	17.72	22.69	49.15	44.62	7.65	1.96	39.05	33.28	11.44	5.07	14.51	31.85	31.01	6.57	13.87	5.14	1.33	12.76	13.7	9.35	18.81	6.28	30.36	16.32	10.33	11.8	41.43	2.49	17.75	13.2	15.63	31.86	37.66	31.28	13.03	16.58
Chr3_12384421_12641549	TSEN2	11.91	23.84	0.48	14.59	7.1	3.93	2.06	3.79	13.48	31.88	8.89	3.18	19.34	22.26	47.71	39.03	3.26	1.77	36.66	32.71	10.47	5.09	15.4	33.26	28.58	5.68	14.85	6.29	0.96	10.74	13.64	10.15	18.56	6.5	28.5	17.39	11.18	12.38	36.76	1.5	18.11	12.19	16.48	34.66	34.98	30.55	13.75	16.85
Chr3_129067827_129283922	CNBP	12.83	25.47	14.82	14.76	9.38	2.29	1.11	2.49	11.2	35.13	9.33	2.61	18.4	23.18	45.77	45.47	2.17	0.68	35.57	35.18	10.42	5.48	18.93	31.6	29.18	5.91	14.23	5.13	0.71	12.55	14.13	9.54	18.21	6.14	28.93	16.23	9.14	11.5	29.5	0.85	18.18	15.23	12.92	28.97	34.31	29.24	13.49	16.45
Chr3_132554446_132779794	UBA5	13.45	22.61	0.5	15.64	8.96	2.53	1.57	3.1	16.23	37.19	6.9	2.81	19.57	19.73	49.06	43.68	2.83	0.86	37.42	32	10.94	4.61	14.77	30.7	34.19	6	14.49	6.62	0.72	12.55	12.68	9.36	19.86	6.11	30.8	17.47	13.47	10.33	36.2	0.78	18.27	13.94	19.7	38.03	34.08	45.83	13.74	15.88
Chr3_138844224_139047137	FOXL2	13.08	28.51	15.57	15.36	8.36	1.64	0.54	2.11	13.3	34.14	8.23	2.36	18.72	22.06	42.57	42.26	1.46	0.6	37.76	31.86	12.85	5.2	15.75	32.8	26.58	6.59	11.48	6.1	0.57	12.63	13.34	9.68	17.87	6.18	32	16.51	11.24	13.27	35.17	0.57	19.03	14.73	14.29	33.85	35.3	29.32	13.57	15.95
Chr3_149062410_149321829	CP	11.87	26.12	0.52	14.46	8.88	4.52	3.02	4.09	16.08	38.83	8.47	3.35	20.7	20.39	46.26	44.72	4.71	1.57	40.12	33.03	10.56	4.69	14.89	31.46	37.64	6.44	15.5	5.51	0.76	13.47	13.83	9.78	20.33	5.85	31.67	17.48	13.15	11.68	42.46	0.95	19.28	13.69	16.03	35.27	36.03	37.63	13.37	16.92
Chr3_180883697_181089774	DNAJC19	13.13	21.17	0.45	15.03	8.08	1.54	0.76	2.15	17.23	38.06	9.07	2.59	22.18	20.34	46.1	45.58	2.37	0.61	40.21	32.39	11.18	5.33	13.79	31.96	36.4	6.09	14.89	6.74	0.61	12.62	13.52	10.06	19.91	5.46	30.97	17.36	14.2	14.29	37.13	0.63	19.79	14.81	20.35	37.98	36.96	43.16	12.88	16.77
Chr3_183597797_183912624	YEATS2	13.63	22.92	10.52	15.33	8.84	6.41	3.08	4.93	13.59	34.21	8.5	4.64	18.4	21.45	46.79	44.85	6.45	1.96	39.62	36.37	12.23	5.77	15.53	34.34	29.95	6.77	15.17	6.76	0.93	13.23	13.64	10.06	18.89	5.75	29.89	17.32	11.43	12.4	37.04	1.39	17.9	14.45	15.68	31.26	32.75	33.04	11.86	16.98
Chr3_184035038_184246127	EIF2B5	12.97	23.47	0.48	14.63	9.16	3.03	0.85	2.48	10.88	31.75	9.01	2.34	18.97	23.15	51.45	39.94	1.52	0.95	34.75	37.23	11.26	6.01	16.21	31.89	32.95	6.29	13.61	5.33	0.64	12.76	15.39	9.17	18.54	7.25	29.83	16.15	8.92	11.92	33.48	0.79	19.3	14.64	13.22	27.26	38.15	28.84	12.9	16.66
Chr3_184246185_184461650	CLCN2	10.57	23.68	0.45	13.03	8.15	1.84	0.81	2.39	8.04	25.65	7.9	2.23	17.49	21.28	43.29	42.26	2.09	0.67	32.31	30.99	10.13	4.12	12.98	27.69	25.77	5.4	10.94	6.48	0.58	10.75	12.14	8.99	16.22	5.7	25.87	14.46	6.82	11.58	29.27	0.64	15.47	11.67	10.29	26.21	31.19	23.31	11.27	14.92
Chr3_193493144_193797811	OPA1	11.64	23.79	0.49	14.93	8.46	5.58	3.44	4.93	15.36	35.64	8.41	4.48	18.29	21.22	51.99	44.7	6.14	1.59	39.77	35.49	9.13	5.39	14.48	30.78	38.48	5.83	15.46	6.05	0.95	12.76	12.53	9.58	19.63	5.87	30.48	16.43	12.72	11.72	42.19	1.59	18.97	13.6	18.61	35.85	38.24	37.35	13.64	17.37
Chr3_197568867_197849727	RUBCN	11.95	22.22	0.5	14.38	9.14	4.46	3.23	5.25	12.42	34.28	8.12	3.93	20.06	21.44	44.19	42.76	4.88	1.27	36.9	34.32	10.89	5.48	15.05	32.38	31.95	6.56	14.59	7.12	0.96	13.86	13.8	10.05	18.31	5.65	29.66	17	10.41	12.21	34.71	1.66	18.29	14.01	14.45	30.98	36.69	28.78	14.38	17.01
Chr3_42979229_43206085	POMGNT2	12.37	23.12	0.47	14.43	8.98	2.42	1.73	2.95	12.18	29.93	8.46	3.02	18.02	19.73	47.79	38.16	2.34	1.03	36.54	32.3	8.8	4.78	14.75	31.55	30.44	5.3	14.1	5.47	0.84	12.68	11.05	9.04	17.92	6.72	30.19	15.68	10.25	12.34	32.24	0.88	19.54	11.63	12.05	30.4	34.5	27.83	11.2	16.06
Chr3_43254859_43791594	ANO10	12.2	23.49	0.47	15.29	8.22	9.47	4.94	8.55	14.14	36.93	8.78	6.08	19.76	22.07	51.73	46.48	8.91	2.23	38.49	32.91	10.05	5.33	15.84	32.08	34.68	6.32	15.97	6.52	1.2	12.32	12.87	9.52	19.28	5.75	30.62	16.39	11.84	11.57	38.5	2.65	18.57	14.21	19	37.81	37.46	37.46	13.95	15.5
Chr3_4393345_4947506	ITPR1	12.04	22.07	0.51	15.29	8.35	7.72	5.11	7.34	12.88	34.71	8.04	6.34	17.89	22.06	49.7	45.91	9.17	2.59	38.02	34.51	10.81	5.64	14.69	30.52	34.97	6.75	14.41	6.38	1.36	11.9	12.36	9.03	18.85	5.7	31.28	16.6	10.8	10.4	40.56	2.79	18.75	13.07	18.4	35.81	37.32	34.1	12.52	16.02
Chr3_45288561_45654726	LARS2	13.26	26.9	0.46	16.27	9.25	7.03	3.6	5.84	12.07	31.14	8.41	4.78	17.65	23.4	44.25	42.75	7.2	1.92	39.15	33.71	11.25	4.74	16.59	31.01	29.59	5.41	13.03	6.41	1.12	12.01	13.24	9.57	19.34	6.23	28.78	16.16	9.96	11.95	38.26	1.95	17.83	14.49	17.06	32.58	36.14	34.83	13.13	16.14
Chr3_49368703_49823973	DAG1;GMPPB	12.5	21.67	0.54	13.86	9.02	3.37	1.5	3.2	10.53	28.96	9.19	3.49	18.8	23.37	50.25	48.11	3.08	1.13	36.21	34.28	12.14	5.07	13.79	29.7	29.65	6.3	12.4	5.06	0.87	12.82	13.54	9.21	17.95	6.61	28.58	16.35	8.73	11.52	31.73	0.79	18.16	13.88	13.57	27.12	36.86	29.89	13.8	15.3
Chr3_50262613_51484198	DOCK3;CACNA2D2	12.42	24.13	0.49	16.7	8.7	9.92	5.47	8.99	12.29	32.25	8.5	6.51	20.16	22.48	50.52	44.98	9.6	2.79	38.13	34.13	11.11	5.03	16.03	30.53	32.99	6.16	14.08	6.31	1.52	12.55	13.99	8.81	18.76	6.36	30.77	16.06	10.2	12.02	36.52	2.88	18.7	13.46	16.19	33.02	37.17	32.71	13.23	15.48
Chr3_63763155_64103462	ATXN7	12.81	23.84	10.43	14.63	9.13	7.23	3.29	5.58	15.16	37.94	8.59	4.51	19.13	22.49	54.58	44.76	7.03	1.86	41.6	34.21	11.56	5.14	13.7	32.06	35.68	6.52	15.25	5.96	1.22	11.84	12.65	9.42	19.73	5.72	31.41	16.71	12.86	12	39.87	1.68	18.62	13.9	17.92	35.25	35.92	39.29	14.7	17.4
Chr3_93880139_94155678	ARL13B	11.97	24.87	0.69	15.7	9.08	4.83	2.35	4.54	17.97	41.02	7.8	3.79	20.76	20.32	47.66	45.18	5.87	1.57	36.87	35.24	10.86	5.23	13.81	32.36	38.22	6.16	16.16	6.16	0.95	13.23	13.89	9.95	19.66	5.54	29.74	16.03	15.04	11.6	40.51	1.1	18.2	15.15	20.27	38.38	35.63	36.84	12.85	16.24
Chr4_107831549_108053461	CYP2U1	12.39	26.32	0.44	15.33	8.41	2.64	1.18	3.23	15.33	34.08	7.95	2.99	18.67	19.38	49.37	43.15	2.26	0.98	39.74	32.71	11.17	4.58	16.39	31.66	35.07	5.5	13.46	5.77	0.73	12.66	11.58	9.8	19.65	6.14	29.78	16.46	12.5	9.8	39.4	0.72	17.68	13.32	18.58	38.9	37.82	35.37	13.85	17.15
Chr4_1111445_1349953	CTBP1	11.67	21.67	0.54	16.14	8.71	2.77	1.04	3.77	10.09	31.85	8.62	3.14	17.79	21.97	45.13	43.68	2.87	1.13	36.07	38.1	10.37	5.26	12.02	28.39	28.27	6.45	10.89	5.23	1.05	12.31	13.47	8.28	16.56	6.65	29.41	16.1	8.17	12.74	29.47	0.91	17.65	14.75	11.15	27.25	34.59	20.57	12.85	16.1
Chr4_121774481_122052060	TRPC3	14.09	19.74	0.44	15.97	9.81	5.42	2.62	4.43	16.97	38.31	8.26	3.48	20.82	19.92	52.19	47.6	5.33	1.78	38.48	34.09	10.82	4.99	15.36	32.86	34.97	5.57	18.4	5.68	1.02	12.52	13.57	10.29	19.96	5.58	31.31	15.83	14.13	12.59	42.74	1.47	18.64	14.54	23.63	41.39	36.66	44.98	12.48	17.52
Chr4_15369865_15701552	CC2D2A	13.33	24.35	0.42	15.39	8.73	6.92	3.05	6.08	15.86	37.29	7.63	4.53	20.84	20.16	46.56	46.85	6.37	2.32	40.1	32.56	9.9	5.35	15.96	33.76	34.32	6.02	15.93	7.35	1.07	12.99	13.78	10.18	19.25	5.89	31.32	16.27	13.31	12.12	39.54	1.71	18.41	15.59	17.99	36.37	36.03	38.08	13.27	17.37
Chr4_159003013_159460174	RAPGEF2	13.31	24.03	7.17	14.74	8.9	7.35	4.45	6.5	17.74	39.66	9.42	5.4	22.38	22.06	49.32	46.36	10.51	2.25	38.65	34	10.36	5.11	15.58	33.52	36.77	6.88	15.44	5.78	1.62	12.71	13.46	9.94	20.17	5.86	31.74	17.18	14.76	11.44	43.93	2.3	18.66	15.06	19.23	40.64	35.12	39.26	14.01	18.48
Chr4_25020014_25260550	SEPSECS	13.31	20.51	0.49	14.82	7.75	3.41	1.89	3.16	12.96	33.46	7.85	3.19	17.34	21.42	48.12	44.23	3.37	1.03	40.95	34.23	10.52	4.5	14.86	31.13	35.55	6.3	17.32	7.14	0.68	12.3	12.97	9.11	18.89	5.92	28.68	16.04	11.03	11.57	36.23	0.84	17.7	14.35	19.14	35.61	41.65	36.2	13.19	15.27
Chr4_2941422_3343960	HTT	12.92	22.43	10.26	15.87	9.05	7.77	4.09	7.38	10.89	31.21	8.25	4.81	18.05	21.93	48.46	43.51	7.78	2.15	36.18	34.88	11.61	5.14	14	31.35	28.62	5.79	14.22	5.4	1.14	13.55	15.04	9.48	18.02	6.09	30.35	16.83	9.15	11.98	34.8	2.25	19.07	13.65	13.74	30.18	36.87	26.42	12.93	16.35
Chr4_39187456_39466375	RFC1	13.51	22.9	13.41	14.87	8.12	4.75	3.19	4.55	16.29	36.83	8.42	3.73	19.82	20.45	50.13	43.1	5.2	1.09	40.98	31.71	10.6	5.48	16.68	30.35	36.92	5.63	19.28	7.25	1.13	12.96	14.12	9.6	18.11	5.94	30.78	16.03	13.55	11.32	40.25	1.42	18.26	14.33	16.98	37.46	37.9	35.59	13.17	16.88
Chr4_41156413_41368455	UCHL1	12.59	21.84	0.47	16.62	8.38	1.51	0.93	2.45	14.2	38.35	8.41	2.84	20.69	19.84	44.13	40.1	2.31	0.64	36.67	33.41	12.2	5.31	13.02	32.39	28.27	6.67	13.38	6.07	0.54	14.21	12.96	9.46	17.98	5.82	29.93	15.8	12.03	12.08	37.43	0.78	19.26	13.38	19.23	33.46	33.22	34.35	15.26	15.27
Chr4_41644082_41848725	PHOX2B	12.87	22.74	17.37	15.55	8.51	1.07	0.78	2.06	14.94	37.28	9.47	2.38	18.71	23.41	46.59	40.23	1.47	0.59	36.57	32.47	10.06	4.87	14.26	29.58	30.94	5.53	16.6	5.03	0.64	12.27	13.63	9.35	18.68	5.28	31.26	16.24	12.43	12.16	39.88	0.51	18.52	13.5	18.62	31.49	34.05	34.91	13.24	16.04
Chr4_55246213_55473100	SRD5A3	13.27	23.15	0.47	13.96	7.79	2.73	1.16	3.07	15.51	36.37	7.95	2.75	20.26	21.27	49.05	44.17	2.42	0.94	41.61	37.1	10.74	4.78	17.03	32.95	33.58	6.93	15.01	7.26	0.61	11.6	14.29	9.94	19.01	6.07	28.14	16.15	12.8	11.82	39.22	1.06	17.28	14.63	21.11	38.48	39.74	35.87	13.76	15.63
Chr4_6169849_6403265	WFS1	11.32	23.32	0.66	15.97	9.01	3.06	1.3	3.23	7.24	24.64	8.16	3.3	17.69	23.47	48.16	38.94	2.82	1.11	36.84	34.15	11.77	5.21	14.12	28.7	24.09	6.64	11.59	4.98	0.57	12.07	13.63	8.96	17.26	6.39	28.59	15.63	6.03	11.36	31.45	0.94	18.71	11.94	10.03	27.16	36.73	23.17	12.44	15.55
Chr4_92203966_93910157	GRID2	13.27	23.53	0.46	15.4	8.03	12.95	6.67	10.17	17.81	41.65	7.46	7.33	22.45	20.72	52.88	47.4	12.09	2.98	38.45	34.36	10.65	4.41	15.3	30.64	42.25	5.82	17.64	7.33	1.77	11.96	13.3	9.24	19.97	5.56	30.82	15.95	14.76	11.68	44.48	3.14	18.35	15.32	22.71	42.89	36.36	47.59	13.29	15.84
Chr4_99464081_99723997	MTTP	12.22	22.38	0.47	15.38	9.14	4.42	2.54	4.41	16.01	38.31	8.37	3.42	21.47	20.45	49.14	48.01	4.87	1.15	38.58	32.6	10.74	4.93	14.36	32.02	36.1	5.53	14.34	4.72	0.79	13.44	12.44	9.94	19.56	5.74	28.88	16.71	13.07	10.85	42.11	0.87	17.74	13.61	19.08	36.94	35.65	38.6	12.86	15.96
Chr5_10253695_10540388	MARCHF6	12.88	24.82	10.78	14.22	8.97	5.31	2.63	4.47	11.77	31.09	9.46	4.12	19.04	22.21	49.91	44.85	5.03	1.71	39	32.99	11.5	5.29	15.69	31.87	33.16	5.91	13.99	5.66	0.79	12.86	12.75	9.38	18.89	6.11	32.03	16.31	9.92	12.49	35.82	1.84	18.25	13.34	17.38	32.51	37.66	31.49	12.08	16.05
Chr5_110638136_110865161	SLC25A46	12.51	20.88	0.5	14.41	8.28	2.81	1.65	2.93	16.43	40.79	8.03	2.66	16.87	20.46	49.28	42.41	3.29	1.19	40.53	29.63	10.94	4.16	14.98	31.41	38.16	6.2	15.27	5.91	0.7	12.92	14.33	8.71	19.42	5.8	29.31	16.56	13.58	10.15	41.05	0.91	19.49	14.85	23.78	39.45	36.67	38.04	12.85	14.72
Chr5_113955926_114596500	KCNN2	13.03	22.87	0.55	16.01	8.69	10.08	5.77	7.41	15.63	39.64	7.71	6.61	20.28	20.81	49.16	46.99	10.05	2.44	37.94	32.57	10.45	4.6	15.01	31.04	37.77	5.85	16	6.99	1.44	12.43	14.14	9.03	19.05	5.63	30.83	16.19	12.87	10.63	42.37	2.64	18.45	14.69	20.57	39.9	39.12	39.06	13.27	15.41
Chr5_1153147_1395068	TERT	10.04	21.75	0.45	14.56	6.97	2.8	1.91	3.57	6.3	19.41	6.33	2.64	15.12	19.21	37.01	34	2.68	0.83	27.96	25.93	10.01	4.16	11.6	23.78	22.13	4.79	9.56	4.11	0.44	10.41	11.48	7.36	13.91	5.83	24.44	12.59	5.35	9.46	23.8	1.14	15.59	10.03	8.7	18.55	28.34	20.08	10.78	12.95
Chr5_118303_357082	SDHA	11.95	21.47	0.53	14.69	9.51	3.15	2.58	2.91	9.48	26.94	7.48	3.47	16.81	21.84	47.16	43.75	2.96	1.12	37.13	31.21	9.1	4.87	14.28	28.99	28.82	5.63	12.01	3.93	0.92	12.18	12.82	8.16	17.58	6.43	29.78	16.03	8.01	12.03	32.15	0.89	17.22	14.49	13.16	30.5	34.37	28.81	11.67	15.51
Chr5_126676623_126937020	LMNB1	12.69	22.26	0.51	13.96	9.09	4.14	2.17	4.3	13.17	34.12	9.01	3.56	21.1	18.75	47.36	47.3	4.86	1.02	38.87	36.11	11.59	5.44	13.82	29.94	34.35	6.35	13.42	5.75	1.12	12.13	12.89	9.87	18.78	6.21	28.71	16.33	10.87	11.86	35.97	1.66	18.74	13.8	11.93	32.9	34.43	32.08	13.09	17.19
Chr5_134501149_134749271	SAR1B	14.19	22.34	0.58	12.84	8.14	3.31	2.13	4.22	13.5	33.95	9.15	3.3	20.05	20.13	43.88	47.56	4.57	1.22	35.3	35.17	10.64	5.74	16.4	31.06	29.83	6.34	13.95	6.18	0.94	13.54	13.39	9.95	18.6	6.31	30.07	16.91	10.92	11.74	36.42	1.05	19.27	15.25	14.15	30	37.29	26.59	14.17	15.05
Chr5_138846724_139393557	SIL1	13.05	25.65	0.57	14.98	8.69	8.9	4.83	7.73	12.86	34.19	8.79	5.96	19.5	22.49	49.42	47.5	9.12	2.66	38.58	34.89	11.88	5.33	16.02	32.16	33.98	6.22	14.45	5.85	1.6	12.8	13.87	9.61	18.26	5.96	30.49	15.65	10.63	13.13	40.83	2.51	18.19	14.32	16.52	33.66	37.61	31.02	13	16.23
Chr5_140573035_140791537	HARS1	13.31	21.96	0.49	15.68	8.81	2.29	1.21	3.28	12.81	37.61	9.02	2.54	21.05	20.8	51.11	40.37	2.7	0.9	34.9	32.72	10.45	4.77	16.65	29.64	30.13	6.95	12.92	5.68	0.62	12.49	11.94	9.85	20.15	6.71	28.45	17.32	10.58	10.91	37.22	0.71	19.68	13.77	17.11	34.69	38.79	37.57	12.17	14.36
Chr5_146480742_147184784	PPP2R2B	13.43	23.51	4.29	15.19	8.54	10.21	5.04	7.86	14.91	36.65	7.82	6.5	20.28	21.76	48.07	44.79	10.28	2.53	38.71	36.07	10.65	4.65	15.93	31.7	36.57	5.89	14.83	5.19	1.37	12.81	13.58	9.4	19.04	5.96	30	16.13	12.38	11.77	43.73	2.65	19.42	13.97	21.2	37.27	36.22	37.86	12.79	16.12
Chr5_149953291_150213372	CSF1R	12.88	25.73	0.43	14.45	9.31	4.5	2.08	3.97	9.83	30.04	8.4	3.64	18.58	22.1	48.46	42.79	4.69	1.49	40.06	36.08	10.41	4.98	15.87	32.27	31.11	5.45	14.27	7.56	0.94	11.83	12.41	8.73	17.69	6.54	29.6	16.79	8.16	10.93	32.38	1.01	18.62	13.05	13.37	30.37	33.78	27.67	13.83	16.46
Chr5_151404092_151691331	FAT2	11.73	22.57	0.45	14.49	8.58	4.11	2.18	4.89	9.87	32.47	9.06	3.94	17.93	23.41	50.47	42.66	4.35	1.63	36.49	36.31	11.46	5.03	13.93	30.06	27.63	5.58	14.37	6	1.08	14.07	14.52	9.06	19.49	6.08	31.84	16.27	8.11	12.11	36.07	1.42	16.72	13.6	14.39	32.62	36.66	29.41	12.8	16.37
Chr5_154787411_155038211	GEMIN5	12.05	22.26	0.43	13.44	8.84	3.91	1.65	3.65	12.26	35.18	9.13	3.45	20.51	19.82	45.76	42.58	3.3	1.01	38.02	34.93	10.59	4.89	14.19	30.92	33.47	6.43	14.45	6.26	0.99	11.7	12.92	9.72	18.6	5.77	30.84	16.45	10.15	10.79	32.44	0.76	16.18	13.52	14.5	34.81	36.37	32.33	13.17	17.59
Chr5_157631420_157841449	THG1L	12.68	24	0.51	12.98	7.22	1.58	1.09	2.55	14.52	40.99	7.53	2.41	16.77	21.29	36.78	42.9	2.11	0.72	38.96	31.34	10.92	5.27	16.45	33.71	32.77	6.49	11.91	5.07	0.62	11.7	13.83	10.04	19.11	5.69	30.18	16.06	11.62	11.18	39.62	0.61	18.76	14.39	15.93	35.11	34.56	30.87	12.69	16.95
Chr5_179706398_179938078	SQSTM1	12.87	27.36	0.52	15.36	9.02	2.33	1.14	3.28	11.46	30.14	8.54	3.17	21.3	23.84	44.96	45.45	2.9	0.84	35.13	36.08	12.25	4.69	12.7	30.43	28.36	6.25	11.72	5.7	0.7	12.39	14.05	9.23	17.28	5.82	25.74	17.39	9.53	12.69	33.33	0.91	17.68	13.61	11.35	29.23	35.54	24.81	14.14	17.47
Chr5_36496588_36788334	SLC1A3	13.07	21.71	0.51	14.3	9.55	4.27	1.85	4.52	13.87	35.98	8.16	3.92	19.21	21.71	50.96	46.6	5.51	1.72	37.7	30.46	12.59	4.69	16.31	31.97	28.33	6.45	14.4	5.28	1.09	12.95	12.94	9.55	20.03	5.89	29.55	15.91	11.8	11.54	38.22	1.55	19.24	13.11	16.77	34.58	34.39	37	13.34	16.4
Chr5_37006228_37349376	CPLANE1	12.99	23.57	0.51	15.35	8.33	6.23	4.06	5.41	16.92	37.68	8.22	4.29	21.67	20.33	45.89	47.08	6.26	1.58	40.01	31.14	11.5	4.98	16.52	33.4	36.58	6.06	14.62	5.74	1.03	12.97	14.24	10.09	20.01	5.74	31.15	17.21	14.09	12.57	43.38	1.34	18.96	15	18.85	36.29	35.68	36.96	13.6	16.4
Chr5_74540023_74822647	HEXB	11.94	23.24	0.47	13.88	9.71	4.21	3.02	4.35	14.93	36.81	7.91	3.97	18.56	19.84	46.08	43.95	4.49	1.35	38.63	36.37	9.78	5.14	15.75	31.75	34.22	6.07	14.1	7.07	1.19	12.85	14.39	9.82	19.4	5.94	29.3	17.2	12.49	11.48	38.83	2.04	17.13	13.61	17.12	36.3	41.26	37.11	12.96	16.58
Chr6_105945423_106425791	ATG5	14.13	22.46	0.46	14.91	8.4	8.46	4.29	7.56	15.71	39.07	9	6.11	20.39	22.53	51.48	44.32	9.48	2.17	39.58	32.62	10.78	5.15	15.6	33.05	34.72	6.24	15.57	7.95	1.43	12.57	14.53	9.86	20.28	5.9	28.67	16.05	12.86	12.2	39.34	2.26	18.66	13.23	17.41	36.96	38.4	38.02	12.64	16.84
Chr6_117575469_117810727	NUS1	13.38	24.42	0.56	13.93	10.11	3.02	1.44	3.09	15.86	35.88	8.29	3.32	22.34	20.8	50.53	42.38	3.33	1.12	40.98	36.03	10.07	4.72	15.58	30.46	35.44	6.14	16.12	6.57	0.66	12.12	13.66	10.56	18.88	5.92	29.17	17.31	13.43	11.73	37.19	0.95	17.03	13.86	19.33	36.83	35.13	37.8	11.88	16.09
Chr6_135183407_135598434	AHI1	13.49	23.38	0.64	15.13	8.63	8.31	3.61	6.48	17.47	40.06	7.41	5.12	21.68	21.3	50.83	46.06	8.24	2.44	39.76	35.61	11.73	4.95	15.28	33.79	36.91	6.42	15.93	5.85	1.13	12.21	13.42	9.64	19.75	5.78	30.96	16.26	14.26	11.42	42.03	2.43	19.2	14.14	19.46	38.46	35.32	40.86	12.76	16.53
Chr6_136722564_137013934	PEX7	12.08	23.87	0.42	15.19	7.56	4.95	2.67	5.15	15.94	37.64	7.12	4.2	18.86	21.53	47.61	48.91	5.3	1.22	36.28	32.65	11.33	5	14.62	33.38	33.7	6.3	15.38	5.63	0.95	12.32	13.05	10.17	19.33	5.7	29.62	16.6	13.23	11.93	40.24	1.12	17.95	14.9	19.25	38.45	37.32	35.27	13.4	17.16
Chr6_145282535_145836023	EPM2A	13.08	22.87	0.55	14.87	8.86	9.51	5.25	7.14	15.27	38.6	7.47	5.82	20.9	20.26	49.04	46.73	9.61	2.67	39.88	32.73	10.37	4.98	16.35	30.87	43.77	5.91	16.36	7.26	1.46	11.79	13.28	9.32	19.29	5.7	30.84	15.98	12.89	11.46	43.95	2.71	17.43	14.92	20.54	37.93	36.87	40.97	13.57	16.3
Chr6_145927646_146537601	GRM1	11.79	24.65	0.48	15.45	8.72	9.62	4.92	8.13	15.95	41.52	7.92	5.84	22.71	21	52.69	49.08	10.15	2.59	38.36	33.84	10.91	4.73	15.27	31.4	37.41	5.74	16.36	6.25	1.46	12.11	13.55	9.82	19.68	5.91	29.88	15.82	13.37	12.02	44.08	2.8	17.81	14.82	19.04	40.91	37.54	43.87	13.43	16.56
Chr6_152021687_152737801	SYNE1	13.85	23.01	0.48	14.31	8.43	10.32	5.26	8.37	16.19	39.13	7.69	6.24	19.39	20.56	52.13	45.17	11.13	2.43	37.98	34.06	11.38	4.77	14.43	32.61	36	6.09	16.08	6.3	1.68	12.39	14.19	9.57	20.13	5.81	30.9	16.65	13.51	11.84	41.31	2.9	17.74	13.93	20.68	36.57	36.9	38.91	13.92	16.58
Chr6_16199112_16861491	ATXN1	13.01	22.22	5.74	14.75	9.7	10.88	5.61	8.35	13.93	37.65	8.43	6.57	18.84	22.86	51.34	45.55	10.11	2.7	39.99	34.73	11.11	5.33	16.33	32.98	35.7	6.12	14.31	7.43	1.47	12.88	14.49	9.56	18.52	6.13	30.69	16.54	11.59	12.37	40.72	2.78	18.79	13.14	17.81	34.82	37.17	34.82	13.25	17.11
Chr6_170454302_170672870	TBP	8.3	15.24	13.88	11.05	5.95	1.92	0.78	2.09	9.03	23.56	5.02	2.16	14.11	15.17	34.31	29.97	1.62	0.46	26.25	17.97	5.54	2.71	10.5	18.18	24.01	4.45	10.49	2.51	0.39	7.28	7.88	5.71	12.83	3.82	19.46	10.02	7.57	8.56	27.46	0.4	11.73	9.33	10.36	22.51	22.69	23.7	9	11.38
Chr6_18020440_18222677	NHLRC1	12.86	23.17	0.52	14.33	8.56	1.09	0.45	2.07	13.48	33.49	9.14	2.48	19.77	22.31	42.63	41.57	1.24	0.56	37.55	35.9	10.5	5.51	15.88	32.75	32.22	6.23	13.81	6.23	0.56	11.53	15.45	9.38	19.94	6.29	28.96	16.47	11.18	11.7	39.88	0.57	17.42	12.74	15.37	32.5	36.94	30.43	12.73	17.39
Chr6_24394867_24766930	TDP2;ALDH5A1	12.27	23.82	0.47	14.79	8.83	2.93	1.81	3.06	14.33	38.87	8.74	3.36	19.07	20.37	52.71	46.4	3.29	0.98	38.26	34.99	10.67	5.34	13.82	32.19	32.31	5.47	14.78	6.25	0.83	11.68	14.04	10	18.93	6.05	30.23	16.88	11.87	12.28	35.81	0.82	20.47	14.98	18.41	36.6	38.12	36.79	13.7	16.79
Chr6_3123324_3331730	TUBB2B	13.94	24.7	0.62	15.08	8.18	1.57	0.89	2.07	9.2	26.97	8.97	2.38	18.1	22.94	47.52	44.62	1.58	0.68	35.97	31.72	10.91	5.25	14.09	31.2	25.65	5.88	12.83	5.63	0.58	12.99	15.03	9.3	19.05	5.68	29.29	15.92	7.56	13.05	33.72	0.54	19.07	12.76	11.4	29.26	34.35	28.84	13.73	16.34
Chr6_33319661_33553689	SYNGAP1	4.89	12.51	0.28	7.03	4.66	2.58	0.39	1.63	5.95	25.62	3.96	1.14	7.81	13.83	24.84	24.7	2.37	0.53	23.17	15.91	8.03	2.36	10.72	16.67	16.04	3.2	5.75	4.76	0.36	6.98	6.6	4.54	9.12	4.6	13.98	8.14	4.8	5.67	16.56	0.72	8.51	8.87	7.22	14.61	19.73	18.79	5.54	11.42
Chr6_42863865_43079181	PEX6	13.19	25.48	0.54	17.52	8.68	1.89	0.82	2.7	9.76	29.52	9.79	2.7	17.43	21.91	41.97	42.69	2.16	0.74	37.94	31.81	11.48	4.92	14.41	30.38	29.74	5.25	12.99	5.99	0.65	11.69	12.31	9.05	17.02	6.24	29.8	16.02	8.02	10.78	31.94	0.69	16.61	13.9	10.02	29.61	37.64	25.08	13.12	15.77
Chr6_45228157_45764349	RUNX2	12.24	23.5	6.58	14.8	8.94	9.34	4.81	7.47	15.17	36.34	7.96	5.84	21.27	21.59	48.3	45.88	9.47	2.7	39.39	32.57	10.66	5.06	15.65	31.79	36.87	5.8	15.19	5.7	1.42	12.83	13.64	9.45	19.94	5.7	29.89	16.62	12.31	11.01	41.74	2.54	16.62	14.2	21.07	37.31	37.54	40.28	12.97	16.22
Chr6_53167398_53449179	ELOVL5	13.23	24.28	0.5	15.74	7.65	3.84	2.58	5.17	13.49	35.74	7.64	3.92	20.96	23.03	52.37	47.39	5.01	1.41	39.74	33.95	11.28	4.83	13.92	32.88	35.03	6.26	13.87	6.54	0.93	11.85	12.24	9.43	19.33	5.67	30.89	16.13	10.94	12.43	37.32	1.32	19.57	14.47	17.09	35.02	38.87	31.48	12.74	16.94
Chr6_73493379_73753992	SLC17A5	14.38	23.38	0.54	13.91	9.48	3.96	2.32	3.93	15.84	35.79	8.22	3.52	19	23.18	41.72	45.29	4.67	1.34	38.68	31.91	10.29	5.41	16.12	32.71	30.04	6.13	13.5	5.73	0.85	13.46	13.61	9.42	19.36	6.13	29.32	17.34	13.24	12.18	34.46	1.16	18.35	15.11	14.95	33.81	35.8	38.05	13.51	18.2
Chr6_79814814_80446270	ELOVL4;BCKDHB	12.51	23.02	0.47	15.43	8.73	7.27	3.83	6.08	17.33	40.67	7.82	4.61	20.29	20.29	49.86	45.54	7.57	1.84	39.82	34.39	12.24	4.66	14.66	31.61	39.85	5.84	17.3	7.47	1.11	13.24	13.52	9.34	20.35	5.59	30.12	16.67	14.55	12.44	44.26	1.91	18.25	15.33	20.73	40.18	38.83	42.22	12.42	15.96
Chr6_85404776_85694156	SNX14	12.67	26.24	0.47	16.47	8.54	4.9	3.2	3.96	16.71	37.76	9.51	4.41	21.14	22.77	48.62	45.7	5.27	1.41	40.11	34.18	10.69	5.49	14.39	31.92	35.11	6.38	15.23	5.62	0.84	12.95	14.32	9.81	19.39	5.78	29.32	16.33	13.48	11.44	40.85	1.48	18.92	12.16	18.46	35.79	37.54	36.11	14.97	16.09
Chr6_87413459_87690028	RARS2	13.69	23.43	0.5	14.86	9.04	4.59	2.43	4.51	17.95	39.93	7.55	3.99	19.37	21.58	48.41	43.94	4.67	1.23	38.93	34.07	12.16	5.02	14.64	32.09	32.5	5.77	15.01	5.25	0.98	13.72	13.97	9.74	19.48	5.82	33.45	16.19	14.61	11.21	44.55	1.58	18.37	15.25	17.02	39.63	35.23	37.59	13.2	17.74
Chr6_98768535_99048006	FBXL4	13.61	19.9	0.49	14.42	8.36	5.32	2.86	4.1	16.5	36.35	7.77	3.91	19.61	19.77	46.37	47.48	4.93	1.67	39.99	31.99	11.68	4.74	14.04	31.4	32.26	6.4	17.25	6.01	1.02	13.13	12.9	9.8	19.51	6.03	30	15.86	13.78	12	39.75	1.94	17.29	13.83	19.34	36.49	36.58	37.94	12.66	15.95
Chr7_103197435_104089658	RELN;PMPCB	12.67	24.89	0.49	16.24	8.41	9.26	5.03	7.91	16.15	40.5	7.35	5.91	21.21	20.34	51	46.83	9.61	0	38.67	32.86	10.7	5.12	14.61	31.49	36.85	5.99	15.71	6.43	1.44	12.7	13.68	9.31	18.72	5.78	29.88	16.25	13.17	11.79	42.16	2.48	18.08	13.62	20.47	38.31	35.38	40.3	13.9	16.06
Chr7_107101372_107664261	COG5	14.34	24.89	0.46	15.51	8.87	9.46	5.48	8.18	17.87	42.38	8.49	6.68	22.18	18.96	49.46	50.22	10.71	0	38.48	34.1	10.72	5.12	15.98	32.43	37.41	6.41	16.15	7.66	1.15	12.74	14.23	9.66	19.32	5.55	30.52	16.2	14.8	12.09	41.97	2.35	18.98	15	17	38.92	37.97	40.4	14.46	16.51
Chr7_12111270_12343367	TMEM106B	13.34	21.84	0.44	15.41	8.51	2.92	1.72	3.02	18.05	39.67	7.34	3.15	21.53	19.54	42.81	46.75	2.65	0	36.18	35.64	11.41	4.47	15.66	30.76	35.69	5.39	18.23	6.48	0.76	10.91	14.05	10.06	19.31	5.91	30.78	15.97	14.99	12.65	40.54	1.04	17.04	14.41	22.71	41.29	34.4	38.48	14.15	17.98
Chr7_130293771_130542433	CEP41	11.74	19.3	0.5	14.35	7.96	4.09	2.18	3.44	11.29	32.68	8.02	3.09	17.25	23.04	45.9	41.79	5.18	0	36.65	34.25	10.58	5.39	16.04	30.3	33.27	6.92	13.03	6.5	0.83	11.68	13.52	8.79	19.12	6.13	28.5	16.15	9.34	12.9	39.23	1.05	18.29	12.28	17.67	33.14	39.99	33.11	11.71	13.84
Chr7_15987525_16602504	CRPPA	12.88	22.57	0.49	15.49	7.97	10.05	4.67	7.96	16.75	39.15	8.08	6.14	21.95	20.3	50.97	47.49	11.14	0	40.13	35.31	12	4.86	14.19	31.64	39.39	5.84	17.77	5.48	1.47	13.15	13.78	9.19	19.8	5.77	31.42	15.97	13.99	12.5	43.84	2.85	18.35	14.72	21.13	41.91	36.73	42.29	13.59	16.34
Chr7_2437810_2655694	BRAT1	12.52	20.61	0.51	14.36	7.53	2.58	1	2.77	8.13	25.24	7.87	2.86	16.5	22.89	40.18	43.07	2.61	0	33.61	32.97	11.22	4.28	13.95	27.53	21.88	5.61	11.63	3.79	0.63	12.62	13.97	9.16	15.91	6.1	26.52	15.5	6.32	11.27	25.02	1.08	17.31	13.1	8.47	23.45	36.78	21.01	13.7	14.48
Chr7_38622974_39032394	VPS41	12.42	24.22	0.49	15.63	8.69	8.58	3.98	6.85	15.69	38.93	8.03	5.61	19.34	22.21	54.72	45.31	9.39	0	40.6	32.04	10.59	4.85	14.63	31.11	35.9	6.05	15.53	6.03	1.16	13.46	14.56	9.64	19.43	5.72	29.82	16.4	13.09	12.05	45.22	2.49	18.18	13.79	19.91	38.54	35.64	40.24	12.72	17.52
Chr7_5520047_5881696	RNF216	13.39	25.28	0.49	13.38	9.19	5.92	3.86	5.98	11.39	29.84	8.69	5.29	17.95	22.18	50.64	41.6	6.86	0	35.96	33.27	10.83	5.21	15.98	30.82	30.16	7.16	12.3	6.89	1.3	13.96	14.25	9.5	17.94	6.13	30.3	16.62	9.28	10.82	33.43	2.05	19.3	13.06	15.33	28.59	39.87	26.42	13.07	16.06
Chr7_55787456_56042530	ZNF713	14.32	24.51	13.44	14.88	8.69	3.45	2.03	4.78	14.24	36.41	9.77	3.41	21.41	20.19	48.15	43.98	4	0	37.44	36.61	11.52	5.11	15.45	34.01	29.91	6.96	14.83	5.64	0.73	12.82	13.46	9.75	18.14	6.25	28.57	16.74	11.64	12.04	37.75	1.11	19	14.57	16.05	30.99	33.76	33.82	13.17	16.98
Chr7_93030056_93248385	SAMD9L	13.96	22.07	0.43	15.51	8.59	1.91	1.28	2.87	16.55	41.03	8.11	3.14	20.59	19.94	45.43	50.56	2.53	0	40.49	34.27	10.13	4.52	14.1	31.09	40.15	5.29	15.51	6.08	0.66	12.42	12.27	9.65	19.53	6.1	30.48	15.33	13.64	11.28	40.72	0.7	17.65	13.9	21.17	42.95	35	39.42	13.83	15.47
Chr8_104389231_104689024	LRP12	13.07	21.64	11.58	14.99	8.52	5.77	3.23	4.54	16.4	38.34	7.77	3.87	18.78	19.73	49.64	46	4.91	1.51	38.38	35.23	10.49	4.64	13.92	31.34	31.69	5.96	16.49	7.15	0.89	12.32	13.7	9.95	18.66	5.96	30.65	16.78	13.49	12.27	38.15	1.41	18.14	13.96	22.58	38.47	37.56	39.1	13.24	17.52
Chr8_118089455_118722112	SAMD12	12.33	23.98	5.8	15.03	8.45	9.38	5.03	8.58	13.41	37.86	7.74	5.89	20.29	21.91	54.01	43.77	10.1	2.31	37.16	33.4	11.41	4.76	15.97	31.44	34.67	6.24	14.63	6.25	1.56	12.35	13.09	8.95	19.89	5.61	31.11	16.1	11.19	11.82	41.94	2.39	17.91	13.82	19.25	35.65	37.06	40.5	13.98	16.96
Chr8_143982590_144186216	GPAA1	12.33	21.86	0.56	15.15	8.04	1.15	0.71	2.02	10.13	26.55	7.83	2.26	17.01	23.38	41.33	39.79	1.26	0.54	35.56	34.73	12.04	5.1	16.18	27.22	19.87	6.66	10.74	4.67	0.56	12.11	12.04	8.6	17.46	6.36	31.88	16.73	8.62	11.35	24.25	0.61	18.25	15.38	10.53	26.51	36.19	22.48	11.66	15.92
Chr8_144233957_144461286	SLC52A2	12.48	26.15	0.49	16.57	9.07	2.08	1.03	2.64	7.69	26.42	8.12	2.74	21.39	23.47	42.08	44.34	1.7	1.06	28.11	38.48	11.11	4.44	14.09	24.87	19.23	4.52	9.8	5.72	0.57	11.44	13.48	7.22	16.19	6.82	30.88	16.36	6.7	10.39	21.75	0.76	15.42	12.6	9.07	21.39	30.1	18.58	13.45	15.29
Chr8_38125218_38375558	DDHD2	11.94	25.75	0.48	15.01	8.14	3.57	1.84	3.94	15.73	39.18	8.16	3.45	19.91	21.87	54.14	42.65	4.22	1.22	37.57	34.89	11.78	5.14	16.91	33.09	27.95	6.91	15.04	6.42	0.86	12.69	11.4	9.81	19.31	5.88	30	16.75	12.53	12.11	36.27	1.34	18.84	15.42	15.93	33.97	35.13	37.93	12.31	16.85
Chr8_42749637_42997290	RNF170	15.04	23.57	0.54	13.91	8.25	3.12	1.66	3.88	14.37	35.49	9.54	3.29	21.16	22.27	48.83	42.7	3.67	1.02	40.4	36.35	10.45	5.53	15.87	33.17	31.47	6.57	14.87	6.46	0.72	12.99	13.49	9.76	19.07	6.09	29.6	16.24	11.83	11.63	39.13	0.88	18.45	13.91	15.48	35.05	34.92	30.78	12.9	16.58
Chr8_60085412_60381400	CA8	13.61	24.53	0.66	15.6	8.06	5.35	2.73	4.79	15.39	36.51	8	4.24	17.87	22.6	52.79	46.09	6.04	1.83	37.91	31.97	11.41	4.74	15.02	29.87	33.81	5.41	16.15	8.16	0.93	12.77	14.46	9.25	19.23	5.85	30.81	17.03	12.93	11.53	40.57	1.86	17.66	14.67	16.49	38.33	38.7	39.34	14.49	17.19
Chr8_62948553_63186053	TTPA	14.19	22.24	0.48	15.06	8.2	2.94	1.37	3.47	17.25	37.97	7.78	2.76	20.29	22.16	47.59	42.47	3.46	1.01	39	31.44	11.98	4.9	15.78	33.13	32.76	7.03	15.18	4.55	0.56	12.34	14.74	9.84	19.54	5.89	32.05	16.47	14.07	12.82	39.75	0.93	19.09	13.25	17.97	35.71	35.42	37.15	12.94	15.23
Chr8_93654844_93919234	TMEM67	13.1	23.41	0.5	15.11	8.6	4.21	2.31	4.43	16.45	36.2	8.78	3.53	20.41	21.61	46.94	46.35	4.63	1.01	39.72	33.18	10.89	4.86	13.93	33.62	33.12	7.34	15.51	5.82	0.8	12.86	12.57	9.58	19.82	5.58	29.97	16.71	13.65	11.04	39.3	1.88	18.1	14.97	17.64	37.94	33.63	37.47	13.41	15.86
Chr8_96139398_96361610	MTERF3	1.58	0.74	0.45	1.55	1.25	0.99	0.5	1.95	12.31	36.44	8.56	2.17	0.78	2.02	51.89	45.43	1.14	0.6	36.59	35.5	12.32	1.09	0.57	31.15	30.48	1.4	14.58	4.77	0.54	13.03	13.04	9.04	19.56	5.68	29.58	16.82	10.29	1.72	37.62	0.61	17.31	2.5	17.7	38.23	36.27	36.76	12.6	17.4
Chr9_105144622_105753820	SLC44A1;FKTN	12.9	21.85	0.49	15.67	8.93	7.16	4.08	5.66	16.17	39.21	8.65	5.3	21.45	21.71	48.96	46.17	7.89	1.86	39.22	34.46	11.29	5.12	13.44	32.89	35.66	6.22	16.05	6.83	1.31	12.66	14.25	9.51	20.11	5.93	31.11	16.4	13.39	11	43.23	2.03	19.03	14.53	18.14	37.83	37.49	37.17	13.71	17.31
Chr9_128222544_128434072	COQ4	12.74	22.73	0.52	14.33	8.7	1.67	1.02	2.52	9.15	25.94	8.7	2.65	17.64	23.76	48.46	42.9	1.84	0.8	34.21	36.6	10.15	4.9	12.1	29.53	22.91	5.29	10.17	6.52	0.64	11.95	16.07	8.74	17.23	6.65	29.91	16.36	7.6	10.72	33.38	0.64	17.01	14.47	12.71	24.01	34.83	24	13.23	14.19
Chr9_130564594_130782986	PRDM12	14.08	24.14	16.55	14.86	8.78	1.86	1.09	3.41	11.25	31.48	8.17	2.65	15.71	23.41	45.66	41	2.15	0.79	36.38	32.31	10.22	6.11	13.99	31.92	28.08	6.82	10.98	7.46	0.7	12.63	12.83	9.18	18.06	6.26	29.09	16.65	9.36	12.73	34.14	0.71	18.86	13.98	11.17	29.23	38.38	27.94	13.7	16.15
Chr9_131402789_131623806	POMT1	12.02	24.58	0.48	15.95	7.92	2.29	1.19	3.08	8.5	29.09	9.11	2.89	18.85	22.8	48.43	39.77	1.99	0.76	41.99	35.24	10.9	5.89	14.92	28.62	29.88	5.27	10.27	5.29	0.57	12.37	12.37	8.56	17.26	5.68	29.46	15.44	6.95	12.44	28.01	0.88	15.67	13.17	12.55	28.45	35.49	23.17	13.58	15.72
Chr9_132161356_132454986	SETX	13.69	23.88	0.47	16.1	8.12	3.97	2.26	5.2	11.92	32.65	9.22	4.15	20.76	22.17	48.57	42.07	5.45	1.21	36.57	35.05	11.64	4.62	16.53	32.14	27.35	6.33	11.35	5.22	1.03	12.8	13.98	9.72	19.12	5.89	29.97	16.39	10.1	11.24	32.04	1.51	16.88	13.97	17.95	37.44	33.38	27.68	13.08	15.78
Chr9_136310641_136539845	PMPCA;INPP5E	13.07	26.7	0.48	16.82	8.03	1.82	0.9	2.63	6.78	24.57	8.09	2.42	17.13	25.17	48.11	41.71	1.8	1.13	30.93	33.79	10.78	4.83	14.66	26.9	22.79	5.35	9.19	4.58	0.95	12.32	14.43	8.18	16.96	6.67	26.2	16.49	5.92	12.45	23.72	0.73	17.04	13.25	7.88	20.47	32.75	17.39	13.16	15.02
Chr9_136907234_137128915	ABCA2	11.61	21.99	0.57	14.5	7.93	2.43	1.39	2.42	7.59	24.11	8.23	3.04	16.19	23.01	46.68	41.92	1.87	0.7	32.33	35.12	11.8	4.79	13.94	27.04	25.94	5.66	11.23	5.76	0.61	12.33	14.21	7.96	15.8	6.98	27.43	17.2	6.06	10.61	26.09	0.8	17.25	13.59	10.01	21.42	33.97	15.3	12.62	15.38
Chr9_2521182_2760056	VLDLR	14	21.17	0.47	13.25	7.91	3.6	1.47	3.14	14.53	32.57	8.34	3.27	22.05	21.21	42.64	43.7	2.86	0.87	38.4	35.98	9.8	4.81	15.33	31.17	35.96	4.96	16.42	5.39	0.95	12.71	12.47	9.84	19.36	5.94	30	15.96	11.99	11.56	40.55	0.95	18.03	14.23	15.89	34.47	37.85	32.86	11.73	15.69
Chr9_27435640_27673866	C9orf72	12.81	27.49	15.88	15.04	8.29	2.67	1.81	3.86	14.85	37.95	9.05	3.4	18.31	20.4	52.08	45.35	2.58	0.86	39.68	33.15	11.5	4.66	16.9	31.32	37.79	6.23	15.72	5.33	0.92	12.73	12.38	9.25	19.3	5.79	31.17	16.46	12.55	11.39	33.8	1.1	19.27	15.1	17.49	36.56	32.55	41.65	13.85	16.53
Chr9_32786601_33125130	APTX	12.8	24.37	0.46	15.08	8.47	6.38	3.66	6.18	13.71	36.23	8.91	4.81	19.13	23.76	45.18	42.94	6.54	2.03	40.23	33.24	11.41	4.57	15.79	31.41	32.72	6.35	13.88	6.67	0.93	13.09	12.81	9.71	20.58	5.89	30.64	16.77	11.19	12.18	39.45	1.48	17.92	14.06	16.57	34.8	34.74	37.3	15.31	17.03
Chr9_35636866_35849228	GBA2	14.72	26.03	0.43	13.01	6.83	1.89	1.15	1.94	9.26	28.83	7.77	2.58	16.99	20.58	44.24	43.41	1.85	0.6	38.24	38.09	11.71	4.11	14	27.18	30.68	5.21	13.06	5.52	0.61	11.4	13.74	9.26	19	6.3	27.9	16.7	7.91	11.79	33.16	0.56	17.91	13.98	14.7	29.92	34.27	21.22	13.7	14.9
Chr9_37659234_37932117	EXOSC3	12.75	23.61	0.47	14.93	8.26	5.14	2.06	3.96	13.68	37.66	8.31	3.43	17.87	21.97	48.05	46.91	5.68	1.24	36.54	31.24	10.82	5.17	15.58	33.22	35.56	5.64	13.36	8.08	1.14	13.25	14.31	9.29	19.79	5.99	28.59	17.28	11.51	12.1	34.13	1.55	18.18	14.32	18.24	33.05	39.28	39.09	13.7	17.03
Chr9_68935751_69179076	FXN	11.46	23.21	13.65	14.74	7.94	3.11	1.5	3.14	11.96	34.67	9.07	3.33	18.99	20.48	51.02	44.05	2.93	1.09	38.51	33.38	10.34	5.11	13.15	33.94	27.67	6.1	14.58	5.31	0.8	13.04	12.95	9.66	18.83	6.19	29.7	16.32	9.94	11.47	36.23	1.08	17	15.44	13.03	32.32	34.31	33.29	12.5	17.45
ChrM_0_16569	MT-ATP6	0	0	0	0	0	0	0	0	0	0	0	0	0	0	0	0	0	0	0	0	0	0	0	0	0	0	0	0	0	0	0	0	0	0	0	0	0	0	0	0	0	0	0	0	0	0	0	0
ChrX_107528428_107751993	PRPS1	12.5	10.93	0.23	14.57	4.55	3.02	1.33	1.62	5.15	15.69	7.7	3.05	8.7	9.97	50.7	23.36	1.45	0.44	18.06	16.88	10.47	2.66	7.44	32.11	27.31	5.58	6.68	5.94	0.71	6.26	6.68	4.72	9.49	5.79	14.59	7.93	4.28	5.56	18.3	0.69	9.77	12.74	7.37	30.63	19.98	14.7	11.95	15.93
ChrX_135873841_136147269	SLC9A6	12.65	9.8	0.26	17.23	3.93	5.13	2.37	2.36	7.18	16.3	7.83	3.45	10.11	11.09	49.67	21.15	2.69	0.6	19.36	17.25	8.84	2.46	7.55	32.38	33.24	5.28	6.57	5.06	0.73	6.07	7.11	4.82	8.64	5.89	14.6	8.08	5.88	6.16	17.9	1.33	10.33	13.34	7.21	32.82	17.02	15.31	13.89	16.08
ChrX_13634743_13877955	OFD1	12.8	12.3	0.28	15.67	4.5	3.31	2.25	1.78	7.12	18.87	8.59	3.39	11.11	10.6	43.55	22.93	1.98	0.5	19.02	16.19	10.33	2.44	6.84	30.62	32.65	5.73	7.25	5.52	0.86	7.12	6.89	4.78	10.03	5.87	15.15	8.18	5.95	5.82	18.63	1.31	9.06	13.75	9.47	33.63	18.76	15.29	11.96	18.1
ChrX_137466127_137677691	ZIC3	11.91	11.32	8.54	16.08	3.95	1.76	1	1.07	7.01	16.66	7.95	2.59	9.95	10.29	44.61	22.85	0.99	0.32	21.31	15.97	10.54	2.03	7.21	29.52	28.93	5.67	8.98	4.37	0.58	5.19	6.11	4.63	9.33	5.99	14.08	8.03	5.84	5.56	19.69	0.51	8.64	13.06	6.71	37.28	17.68	19.04	12.99	15.12
ChrX_140402985_140605069	SOX3	11.7	8.41	8.14	15.58	3.91	1.12	0.53	1.09	6.82	16.41	7.45	2.57	9.72	9.49	42.36	23.25	0.68	0.42	19.34	17.57	10.98	2.49	6.05	30.83	33.04	5.81	6.57	5.85	0.5	6.24	6.97	4.5	9.84	6.53	15.21	7.63	5.76	5.06	20.81	0.5	7.29	12.58	7.92	35.77	20.29	20.43	12.07	16.53
ChrX_147811919_148051125	FMR1	13.33	9.59	7.58	16.4	4.16	2.99	1.51	1.51	7.39	17.47	7.98	3.43	13	10.46	45.82	22.05	1.76	0.49	18.97	18.32	10.54	2.01	8.89	31.89	39.84	6.36	6.78	6.47	0.9	5.94	6.95	4.61	9.88	5.63	15.75	8.79	6.15	6.42	19.08	1.08	9.09	13.2	8.53	37.03	20.59	19.64	14.69	15.2
ChrX_148400617_149100663	AFF2	12.86	10.76	2.29	14.6	4.06	9.31	6.14	4.53	7.5	19.27	7.51	6.46	10.05	10.85	49.7	21.26	5.18	1.42	21.01	16.74	11.05	2.5	6.93	31.44	33.92	6.06	7.01	7.11	1.53	6.28	6.63	4.71	9.76	5.66	15.77	7.98	6.29	6.14	19.35	2.75	9.18	13.75	10.37	37.08	18.86	19.68	13.39	16.8
ChrX_149496556_149731912	TMEM185A	14.23	11.64	6.93	16.85	4.23	2.93	1.45	1.46	5.62	13.24	7.44	3.63	9.02	11.85	44.74	19.96	1.15	0.47	19	16.43	9.88	2.72	7.17	28.3	26.65	6.04	6.19	4.95	0.7	6.2	6.19	4.47	8.62	5.89	13.71	7.26	4.64	5.79	17.87	1.34	8.07	14.37	6.31	28.37	17.2	14.93	12.05	16.03
ChrX_153417642_153844755	ABCD1;ATP2B3	11.94	14.49	0.27	14.44	4.88	3.56	2.15	1.7	3.94	11.37	8.1	3.34	9.48	11.89	51.56	24.02	1.5	0.62	17.15	19.38	10.98	2.25	7.29	27.8	26.94	5.26	5.31	5.33	0.83	5.84	6.7	4.17	8.19	7.03	13.91	8.42	3.32	5.97	14.09	0.91	9.22	11.92	4.6	25.19	17.75	10.76	12.83	16
ChrX_154662742_154877689	DKC1	14.14	11.73	0.22	16.66	3.54	2.37	0.74	1.73	7.6	18.67	8.11	2.7	8.72	11.28	48.65	19.8	1.03	0.53	19.07	17.14	12.57	2.89	7.35	30.63	31.44	6	7.68	6.89	0.56	6.56	6.96	4.84	9.58	5.93	15.63	7.89	6.47	5.59	20.05	0.75	8.8	13.4	10.17	34.98	18.49	17.64	13.1	15.97
ChrX_15725806_15954931	AP1S2	13.94	13.1	0.26	16.29	4.25	2.69	1.37	1.45	7.82	17.86	8.24	2.63	11.72	10.83	44.75	21.34	1.73	0.39	17.31	15.13	10.38	2.36	9.23	33.15	33.2	5.49	8.02	5.59	0.76	6.58	5.21	5	9.58	6.1	15.22	8.61	6.36	5.45	20.29	0.87	9.2	13.33	9.05	34.58	18.75	18.25	13.48	17.86
ChrX_24903694_25116420	ARX	11.59	10.69	7.65	15.71	5.2	1.82	1.02	1.11	7.25	16.36	9.2	2.6	10.1	10.63	47.54	22.75	0.73	0.35	19.62	15.96	8.76	2.4	7.73	29.64	28.74	5.39	8.03	4.89	0.54	6.48	8.29	4.82	9.16	5.81	15.16	7.6	6.08	6.15	20.08	0.88	8.86	13.59	8.38	35.48	16.74	15.6	12.7	17.38
ChrX_30997677_33439441	DMD	12.81	11.79	0.95	16.05	4.15	12.8	6.72	5.01	8.41	20.3	7.27	7.8	10.53	10.78	50.37	23.13	6.38	1.53	19	17.39	10.37	2.41	7.5	30.98	38.62	5.63	8.25	6.84	1.82	6.01	7.09	4.55	10.06	5.7	14.97	8.05	6.97	5.98	22.32	3.36	9.33	14.25	10.46	40.38	19.28	21.83	13.26	15.92
ChrX_41414934_42023554	CASK	13.02	10.62	0.25	14.41	4.03	10.33	4.93	4.56	8.07	19.82	7.87	5.99	10.73	10.97	50.3	23.48	4.72	1.28	20.09	18.02	10.98	2.68	7.12	31.81	35.54	5.95	7.68	6.9	1.44	6.06	7.24	4.81	9.27	5.49	15.62	8.26	6.66	5.6	22.23	3.05	9.49	13.73	9.92	37.65	16.99	19.66	13.15	16.68
ChrX_67444021_67830619	AR	12.52	11.82	4.04	17.88	4.18	6.87	3.5	3.2	6.95	16.78	7.19	5.1	10.15	11.64	57.69	22.53	3.8	1.03	20.17	18.23	11.78	2.06	7	30.44	34.45	5.82	8.03	6.15	1.33	6.51	6.22	4.39	9.73	5.54	15.99	7.72	5.71	6.13	23.2	1.94	8.49	13.59	9.5	38.44	17.19	21.13	13.77	15.34
ChrX_67849349_68533913	OPHN1	12.76	11.28	0.25	16.21	4.33	9.85	5.59	3.87	7.72	18.14	7.95	6.37	9.75	11.27	52.08	22.29	5.26	1.44	18.8	17.33	10.97	2.65	7.66	31.98	35.66	6.01	8.02	5.95	1.41	6.74	6.76	4.71	9.88	5.72	14.91	8.35	6.26	6	21.2	2.87	8.84	14.39	10	37.15	18.32	19.88	13.65	16.28
ChrX_71266264_71632374	TAF1	13.5	12.75	5.4	14.76	4.79	6.71	4.22	3.25	6.31	18.41	8.6	4.94	9.6	10.88	46.81	23.51	3.87	1.16	18.2	15.67	11.61	2.5	7.17	31.42	31.82	7.49	6.4	6.22	1.08	7.22	6.17	4.87	9.84	6.21	14.82	8.59	5.23	5.46	19	2.6	10.98	13.77	8.6	33.33	18.67	14.42	16.18	16.27
ChrX_74951048_75256732	ABCB7	14.25	12.54	0.22	15.17	4.31	5.3	2.22	2.19	7.62	20.5	8.01	4.88	10.04	11.33	47.14	22.78	3.3	1.03	19.89	17.89	10.87	2.41	7.68	32.69	35.03	6.58	7.97	4.97	1.09	6.84	6.61	4.68	10.13	5.85	14.45	7.94	6.22	5.74	19.7	1.65	8.97	13	10.21	38.64	17.83	19.24	14.21	16.58
ChrX_9686429_10049443	SHROOM2	1.35	0.41	0.25	1.41	0.68	1.2	0.6	1.07	1.52	13.36	2.37	2.18	0.35	1.01	47.4	20.02	0.62	0.29	18.38	15.71	1.27	0.57	0.3	30.88	24.87	1.41	0.59	0.59	0.52	1.08	1.02	1.83	3.49	1.55	14.93	8.66	1.18	0.91	17.22	0.52	1.38	2.43	0.48	4.27	18.31	2.09	2.38	2.92
[truncated: 62 more columns]
