# Supplementary material for: A prospective trial comparing programmable targeted long-read sequencing and short-read genome sequencing for genetic diagnosis of cerebellar ataxia
Source: HighWire-hosted journal article supplement (doi:10.1101/gr.279634.124), 2025-02-27
Supplement: Supplemental_Table_S6.docx [file Supplemental_Table_S6.docx]

**Supplemental Table S6**. Long-read adaptive sequencing validation of diagnostic testing for SCA1, 2, 3, 6 and 7

| **Individual ID** | **Gene** | **Disease** | **Diagnostic RE sizing***  **(Allele 1)** | **Vamos RE size**  **(Allele 1)** | **Straglr RE size**  **(Allele 1)** | Straglr RE size supporting reads | **Diagnostic RE sizing***  **(Allele 2)** | **Vamos RE size**  **(Allele 2)** | **Straglr RE size**  **(Allele 2)** | Straglr RE size supporting reads |
| --- | --- | --- | --- | --- | --- | --- | --- | --- | --- | --- |
| C001 | *ATXN1* | SCA1 | 52-54 | 29 | 48 | 14 | 36-38 | 28 | 29 | 12 |
| C002 | *ATXN2* | SCA2 | 42 | 21 | 43 | 8 | 21 | 19 | 19 | 11 |
| C003 | *ATXN3* | SCA3 | 66 | 13 | 61 | 14 | 18 | 12 | 14 | 15 |
| C004 | *CACNA1A* | SCA6 | 23 | 12 | 14# | 14 | 12 | No call | No call | No call |
| C005 | *ATXN7* | SCA7 | 39 | 10 | 37 | 2 | 13 | 9 | 8 | 5 |

RE, repeat expansion.

* clinical diagnostic PCR testing, +/- 2 repeats.

# Straglr only sized a single allele and did not call the allele as expanded, manual inspection in IGV showed 4 reads with CAG22-23 and 10 reads with CAG12.
