# Supplementary material for: A prospective trial comparing programmable targeted long-read sequencing and short-read genome sequencing for genetic diagnosis of cerebellar ataxia
Source: HighWire-hosted journal article supplement (doi:10.1101/gr.279634.124), 2025-02-27
Supplement: Supplemental_Table_S7.docx [file Supplemental_Table_S7.docx]

**Supplemental Table S7**. Comparison of Straglr and vamos calls for all individuals identified with a pathogenic repeat expansion.

|  | **Individual ID** | **Gene** | **Variant motif** | **Straglr RE size** | **Vamos RE size** |
| --- | --- | --- | --- | --- | --- |
| Pathogenic RE | P066 | *ATXN8/ATXN8OS* | (CAG)n/(CTG)n | 124 | 14 |
| P110 | *ATXN8/ATXN8OS* | (CAG)n/(CTG)n | 768 | 15 |
| P003^ | *FGF14* | (GAA)n | 288 | 52 |
| P004^ | *FGF14* | (GAA)n | 327 | 44 |
| P005^ | *FGF14* | (GAA)n | 328 | 60 |
| P013^ | *FGF14* | (GAA)n | 445 | 452 |
| P014^ | *FGF14* | (GAA)n | 260 | 320 |
| P022^ | *FGF14* | (GAA)n | 108 | 44 |
| P025 | *FGF14* | (GAA)n | 311 | 45 |
| P026^ | *FGF14* | (GAA)n | 16 | 44 |
| P038^ | *FGF14* | (GAA)n | 324 | 52 |
| P040^ | *FGF14* | (GAA)n | 126 | 51 |
| P042^ | *FGF14* | (GAA)n | 252 | 258 |
| P045 | *FGF14* | (GAA)n | 329 | 44 |
| P050^ | *FGF14* | (GAA)n | 270 | 44 |
| P052^ | *FGF14* | (GAA)n | 277 | 43 |
| P063 | *FGF14* | (GAA)n | 325 | 52 |
| P064 | *FGF14* | (GAA)n | 255 | 52 |
| P067 | *FGF14* | (GAA)n | 265 | 277 |
| P068 | *FGF14* | (GAA)n | 249 | 173 |
| P072 | *FGF14* | (GAA)n | 288 | 43 |
| P090 | *FGF14* | (GAA)n | 310 | 42 |
| P100 | *FGF14* | (GAA)n | 378 | 58 |
| P101 | *FGF14* | (GAA)n | 316 | 45 |
| P106 | *FGF14* | (GAA)n | 316 | 52 |
| P107 | *FGF14* | (GAA)n | 325 | 303 |
| P095 | *FXN* | (GAA)n | 947 295 | 6  6 |
| P023 | *NOP56* | (GGCCTG)n | 5 | - |
| P069 | *RFC1* | (AAGGG)n | -  - | 8  8 |
| P078 | *RFC1* | (AAGGG)n | 872  - | 1048  10 |
| P079 | *RFC1* | (AAGGG)n | 794  - | 842  9 |
| P093 | *RFC1* | (AAGGG)n | 944  - | 9  8 |
| P097 | *RFC1* | (AAGGG)n | -  - | 960  9 |
| Carriers of a pathogenic RE | P026 | *FXN* | (GAA)n | 14 | 5 |
| P073 | *FXN* | (GAA)n | 570 | 386 |
| P085 | *FXN* | (GAA)n | 629 | 6 |
| P109 | *FXN* | (GAA)n | 160 | 6 |
| P005 | *RFC1* | (AAGGG)n | 395 | 384 |
| P109 | *RFC1* | (AAGGG)n | 1109 | 105 |
| P014 | *RFC1* | (AAGGG)n^ | 758 | 767 |
| P047 | *RFC1* | (AAGGG)n | 167 | 174 |
| P090 | *RFC1* | (AAGGG)n^ | 640 | 10 |
| P106 | *RFC1* | (AAGGG)n^ | 793 | 270 |

^ motif incorrectly called by Straglr. Upon manual review and orthogonal testing, motif is AAGGG.
