# Supplementary material for: A prospective trial comparing programmable targeted long-read sequencing and short-read genome sequencing for genetic diagnosis of cerebellar ataxia
Source: HighWire-hosted journal article supplement (doi:10.1101/gr.279634.124), 2025-02-27
Supplement: Supplemental_Table_S8.docx [file Supplemental_Table_S8.docx]

**Supplemental Table S8**. Simplified motif catalog for analysis of 22 repeat expansions using vamos

| **Chromosome** | **Target loci** | **Genomic interval** | **Target motif** |
| --- | --- | --- | --- |
| Chr1 | *DAB1* | 57367043-57367118 | AAAAT,ATTTC |
| Chr3 | *ATXN7* | 63912685-63912716 | CAG |
| Chr3 | *CNBP* | 129172577-129172659 | CCTG |
| Chr4 | *HTT* | 3074877-3074940 | CAG |
| Chr4 | *RFC1* | 39348425-39348483 | TTCCC |
| Chr5 | *PPP2R2B* | 146878728-146878759 | CAG |
| Chr6 | *ATXN1* | 16327634-16327724 | CAG |
| Chr6 | *TBP* | 170561907-170562017 | CAG |
| Chr9 | *C9orf72* | 27573485-27573546 | GGGGCC |
| Chr9 | *FXN* | 69037285-69037304 | GAA |
| Chr12 | *ATN1* | 6936717-6936775 | CAG |
| Chr12 | *ATXN2* | 111598950-111599019 | CAG |
| Chr13 | *ATXN8/ATXN8OS* | 70139384-70139429 | CTG |
| Chr13 | *FGF14* | 102161575-102161726 | GAA |
| Chr14 | *ATXN3* | 92071011-92071052 | CAG |
| Chr16 | *BEAN1* | 66490398-66490453 | TGGAA,AAAAT |
| Chr19 | *CACNA1A* | 13207859-13207898 | CAG |
| Chr19 | *DMPK* | 45770205-45770266 | CTG |
| Chr20 | *NOP56* | 2652733-2652775 | GGCCTG |
| Chr22 | *ATXN10* | 45795355-45795424 | ATTCT |
| ChrX | *AR* | 67545317-67545419 | CAG |
| ChrX | *FMR1* | 147912037-147912111 | CGG |
